# Supplementary material
Source: publisher figshare collection journal article supplement (https://geolsoc.figshare.com/articles/dataset/_/3453860)
Supplement: Supplementary file 1 [file 1]

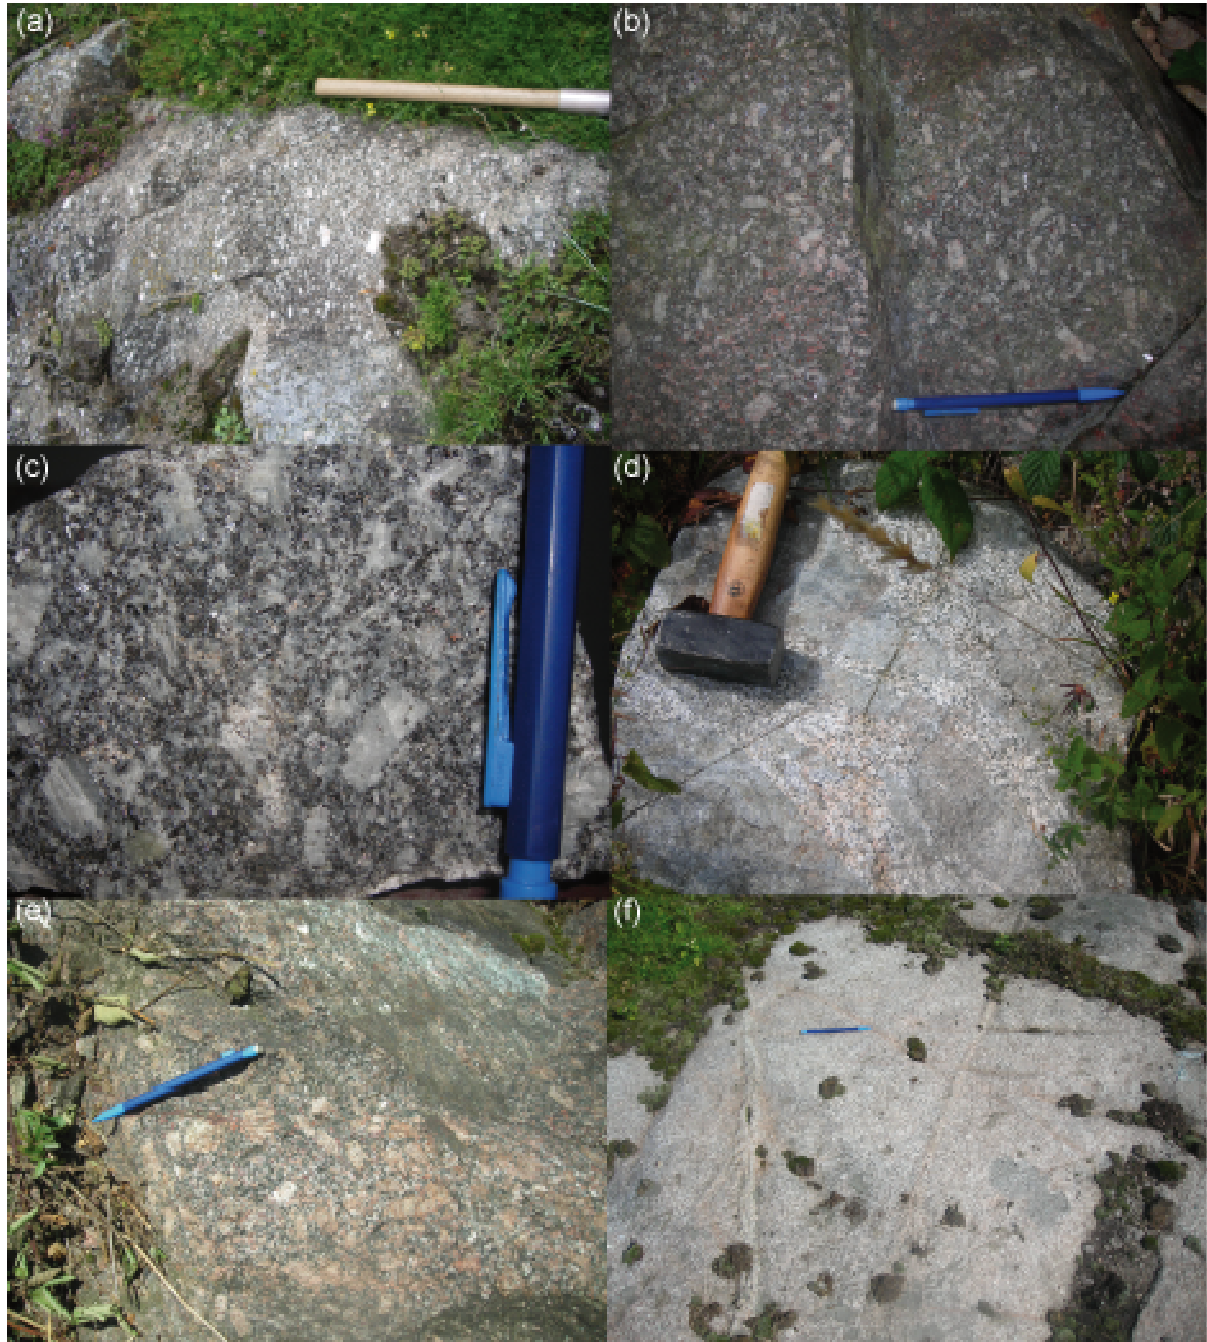

**Fig. 1:** Photographs illustrating the Vosgian granitoids of the two Mg–K associations. **(a)** – Basic rocks of CVMg–K. **(b)** – Dark facies of CVMg–K. **(c)** – Light facies of CVMg–K. **(d)** – Basic rocks of SVMg–K. **(e)** – Porphyritic facies of SVMg–K. **(f)** – Fine-grained granite of SVMg–K.

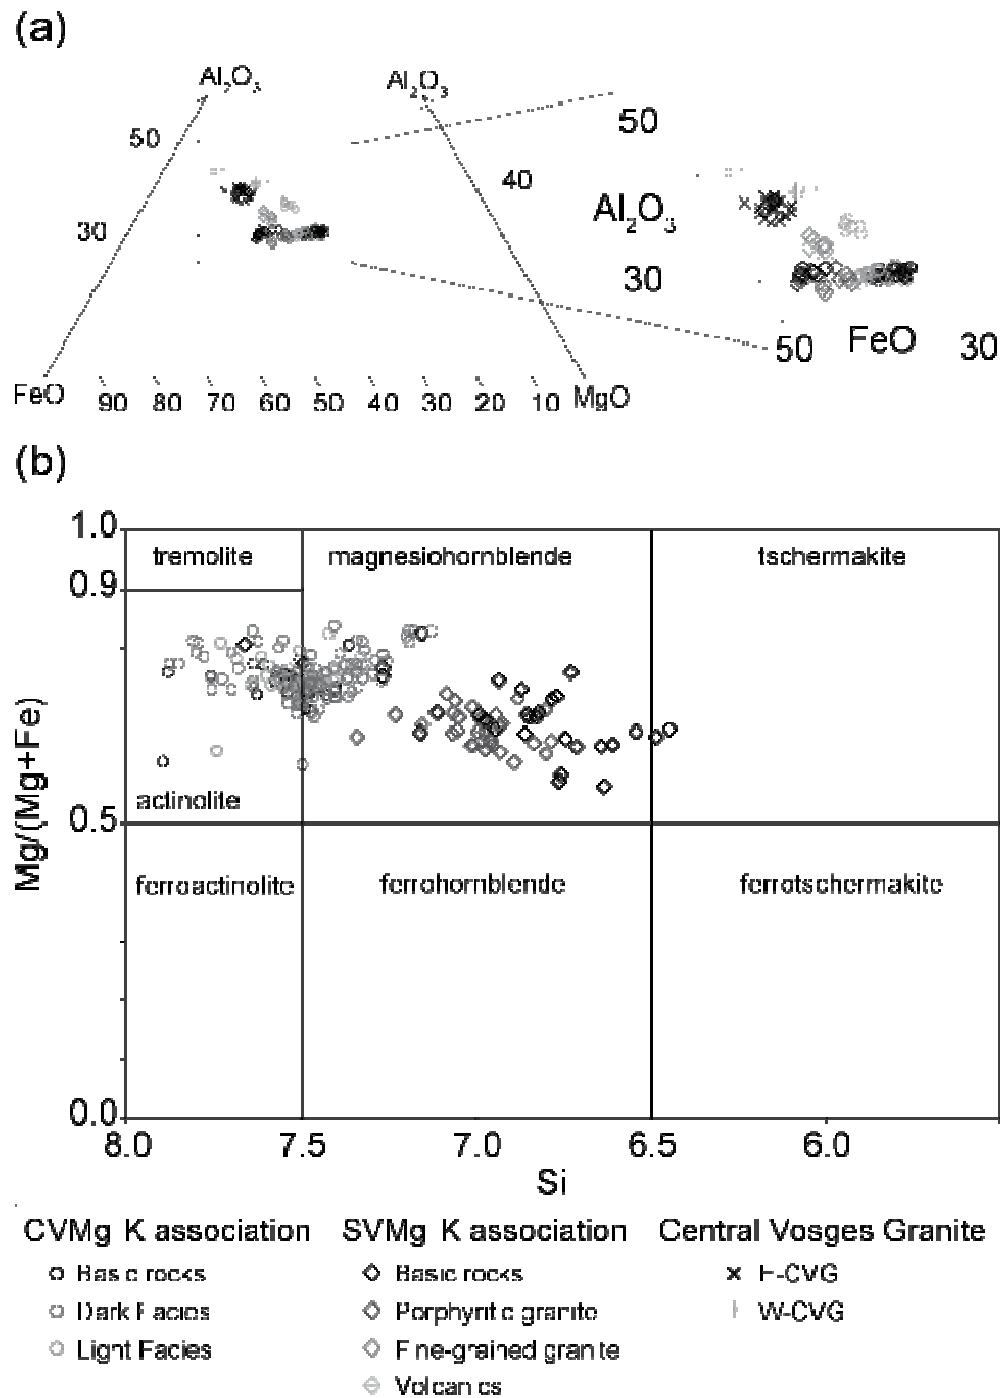

**Fig. 2:** (a) – Biotite compositions from CVMg–K, SVMg–K and CVG in  $\text{Al}_2\text{O}_3$ –FeO–MgO (wt. %) diagram; (b) – Amphibole compositions from CVMg–K and SVMg–K in  $X_{\text{Mg}}$  vs. Si (a.p.f.u.) diagram (after [Leake et al. 1997](#)).

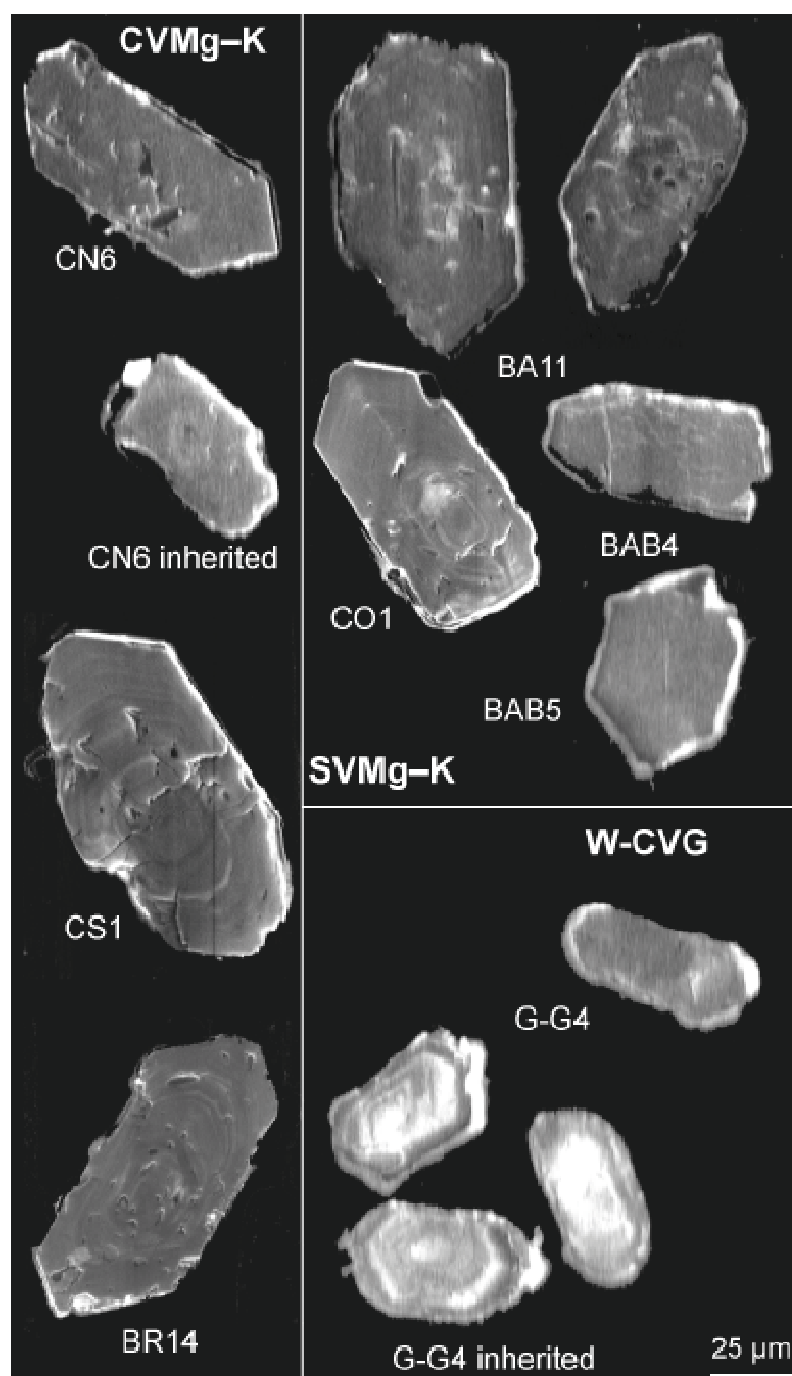

**Fig. 3:** Cathodoluminescence images of the typical dated zircon grains for CVMg-K (CN6, CS1 and BR14), SVMg-K (BA11, CO1, BAB4 and BAB5), W-CVG (G-G4 and G1-3).

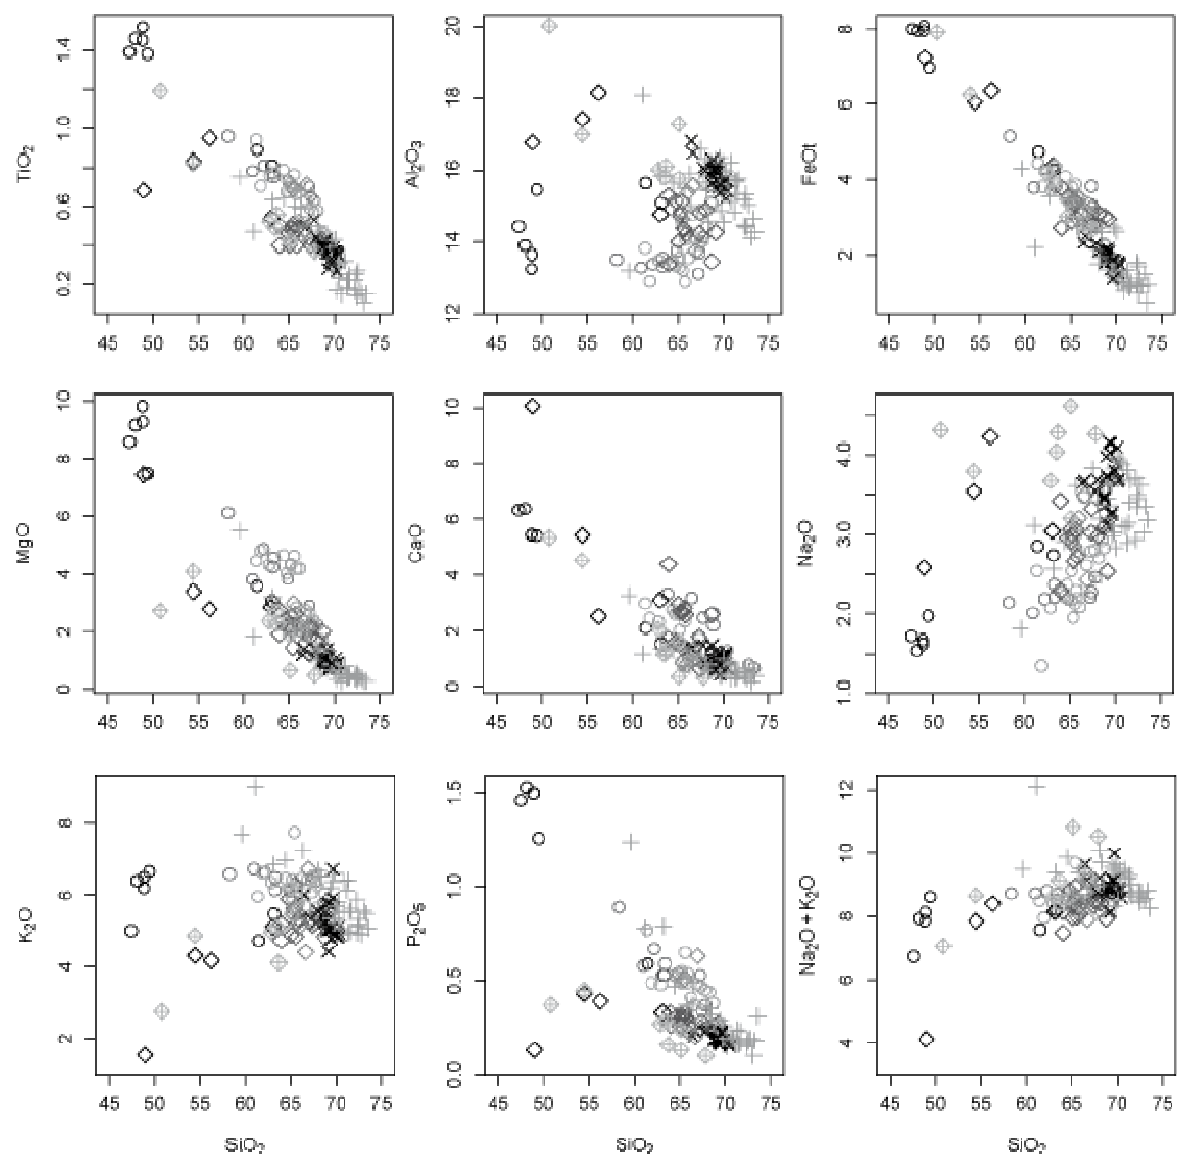

**Fig. 4:** Binary plots of silica vs. selected major- and minor-element oxides and total alkalis (wt. %) for whole-rock samples from CVMg-K, SVMg-K, E- and W-CVG. Same legend as in Fig. 2.

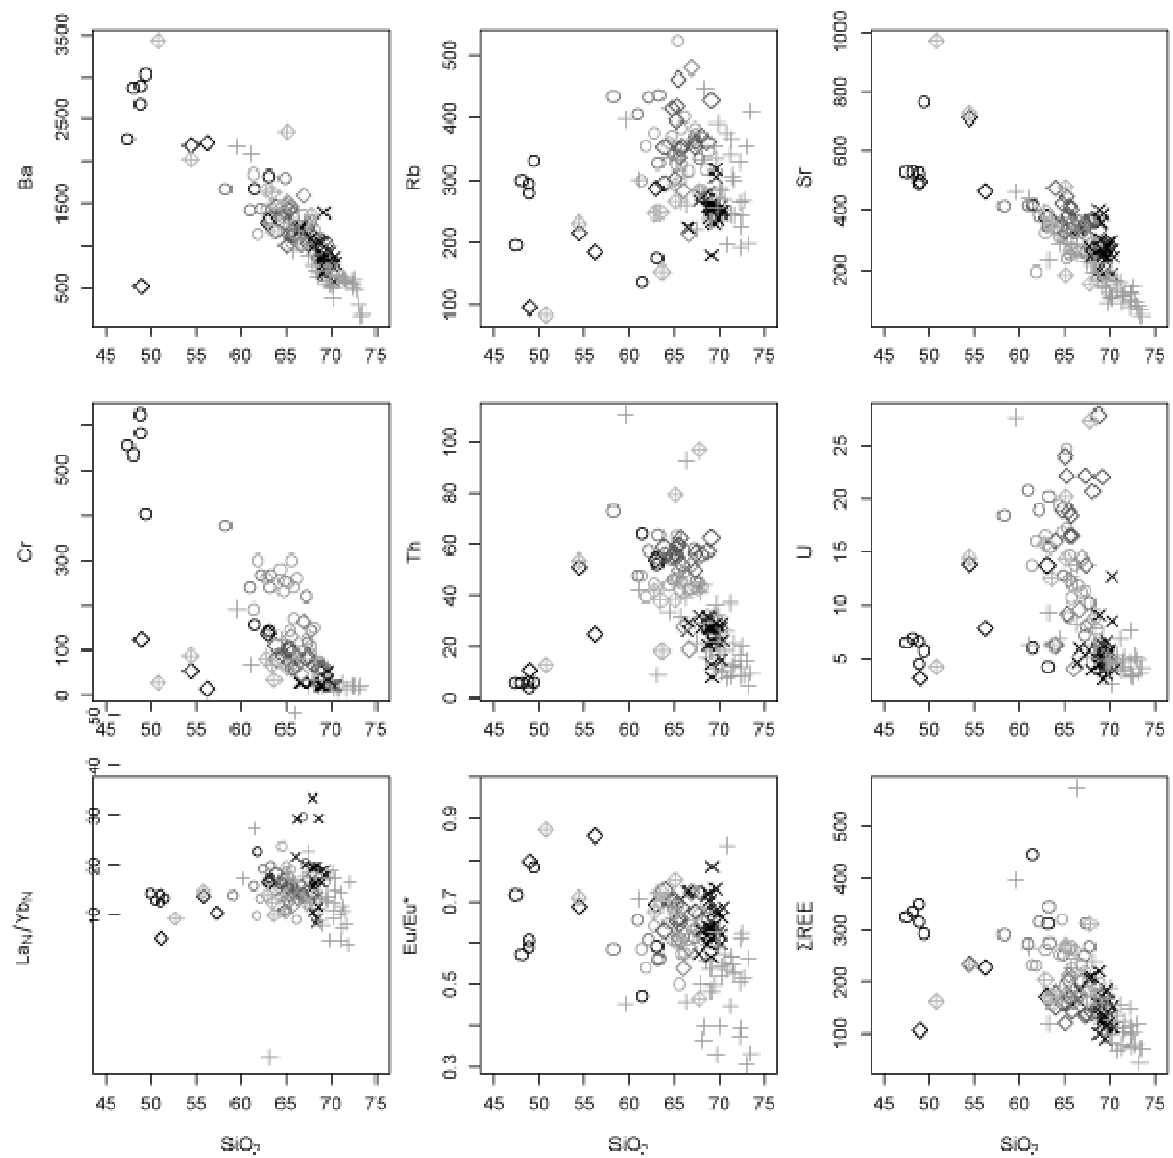

**Fig. 5:** Binary plots of silica vs. selected whole-rock trace-element contents (ppm),  $\text{La}_N/\text{Yb}_N$  ratios,  $\text{Eu}/\text{Eu}^*$  and  $\Sigma\text{REE}$ . Same legend as in Fig. 2.

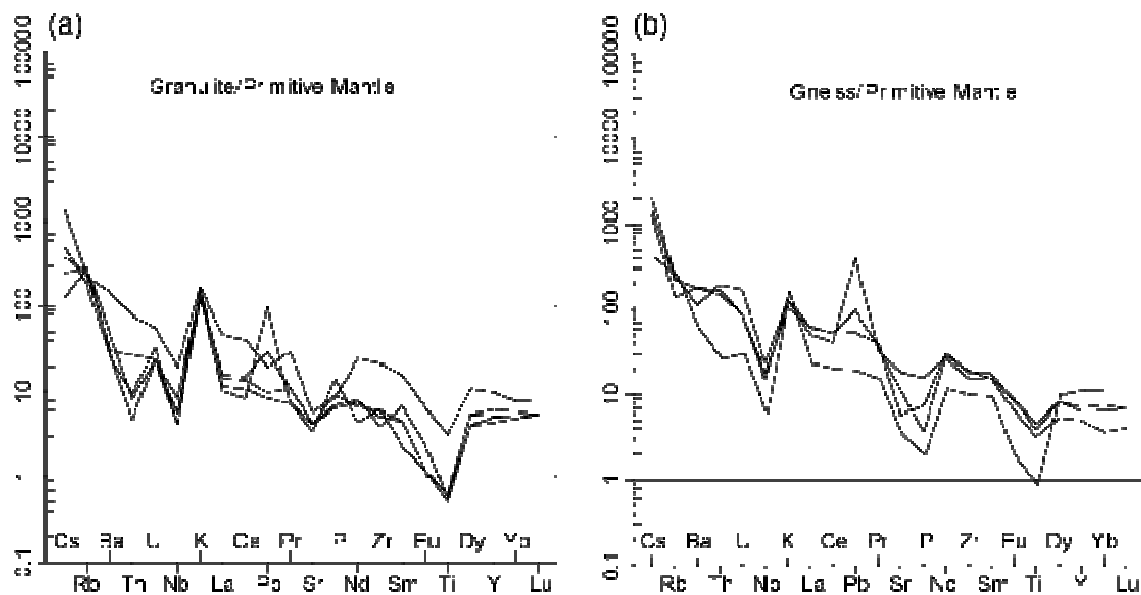

**Fig. 6:** Primitive mantle-normalized spider plots (after [Sun & McDonough 1989](#)) for (a) – Vosgian granulite and (b) – gneiss (data from [Skrzypek 2011](#)).

## References:

- Leake, B.E., Woolley, A.R., Arps, C.E.S., Birch, W.D., Gilbert, M.C., Grice, J.D., Hawthorne, F.C., Kato, A., Kisch, H.J., Krivovichev, V.G., Linthout, K., Laird, J., Mandarino, J.A., Maresch, W.V., Nickel, E.H., Rock, N.M.S., Schumacher, J.C., Smith, D.C., Stephenson, N.C.N., Ungaretti, L., Whittaker, E.J.W. & Youzhi, G. 1997. Nomenclature of amphiboles: Report of the Subcommittee on Amphiboles of the International Mineralogical Association, Commission on New Minerals and Mineral Names. *American Mineralogist*, **82**, 1019–1037.
- Skrzypek, E. 2011. *Contribution structurale, pétrologique et géochronologique à la tectonique intracontinentale de la chaîne hercynienne d'Europe (Sudètes, Vosges)*. Ph.D. thesis, University of Strasbourg.
- Sun, S.S. & McDonough, W.F. 1989. Chemical and isotopic systematics of oceanic basalts: implications for mantle composition and processes. In: Saunders, A.D. & Norry, M. (eds) *Magmatism in the Ocean Basins*. Geological Society of London, Special Publications, **42**, 313–345.
