# Supplementary material
Source: publisher figshare collection journal article supplement (https://geolsoc.figshare.com/articles/dataset/_/3453860)
Supplement: Supplementary file 2 [file 1]

Tab. 1: U–Pb zircons data from CVMg–K, SVMg–K and W-CVG samples.

| Analysis_# | zircon<br>shape/CL | Spot<br>location | Pb<br>(ppm) | Th<br>(ppm) | U<br>(ppm) | Th/U | <sup>207</sup> Pb/ <sup>235</sup> U | 2 σ   | <sup>206</sup> Pb/ <sup>238</sup> U | 2 σ    | Rho  |
|------------|--------------------|------------------|-------------|-------------|------------|------|-------------------------------------|-------|-------------------------------------|--------|------|
| <b>CN6</b> |                    |                  |             |             |            |      |                                     |       |                                     |        |      |
| 10180411e  | prism/uniform      | rim              | 53          | 239         | 994        | 0.24 | 0.407                               | 0.009 | 0.0537                              | 0.0010 | 0.86 |
| 11180411e  | prism/uniform      | rim              | 90          | 305         | 1715       | 0.18 | 0.418                               | 0.009 | 0.0537                              | 0.0010 | 0.90 |
| 12180411e  | prism/uniform      | core             | 101         | 402         | 1905       | 0.21 | 0.401                               | 0.009 | 0.0541                              | 0.0010 | 0.90 |
| 17180411e  | prism/uniform      | core             | 93          | 402         | 1735       | 0.23 | 0.401                               | 0.009 | 0.0539                              | 0.0010 | 0.88 |
| 18180411e  | prism/uniform      | rim              | 77          | 336         | 1432       | 0.23 | 0.409                               | 0.009 | 0.0540                              | 0.0010 | 0.87 |
| 20180411e  | prism/uniform      | rim              | 129         | 549         | 2413       | 0.23 | 0.427                               | 0.012 | 0.0541                              | 0.0010 | 0.71 |
| 21180411e  | prism/uniform      | rim              | 68          | 280         | 1274       | 0.22 | 0.438                               | 0.011 | 0.0537                              | 0.0010 | 0.79 |
| 22180411e  | prism/uniform      | core             | 94          | 475         | 1762       | 0.27 | 0.400                               | 0.009 | 0.0539                              | 0.0010 | 0.87 |
| 28180411e  | prism/uniform      | rim              | 60          | 248         | 1126       | 0.22 | 0.400                               | 0.009 | 0.0541                              | 0.0010 | 0.83 |
| 29180411e  | prism/uniform      | rim              | 63          | 261         | 1194       | 0.22 | 0.396                               | 0.009 | 0.0540                              | 0.0010 | 0.83 |
| 30180411e  | prism/uniform      | core             | 106         | 465         | 2015       | 0.23 | 0.398                               | 0.009 | 0.0537                              | 0.0010 | 0.84 |
| 31180411e  | prism/uniform      | rim              | 69          | 410         | 1267       | 0.32 | 0.397                               | 0.010 | 0.0538                              | 0.0010 | 0.79 |
| 09180411f  | prism/uniform      | core             | 73          | 303         | 1406       | 0.21 | 0.400                               | 0.009 | 0.0535                              | 0.0010 | 0.84 |
| 10180411f  | prism/uniform      | core             | 70          | 395         | 1290       | 0.31 | 0.436                               | 0.010 | 0.0535                              | 0.0010 | 0.83 |
| 12180411f  | prism/uniform      | rim              | 149         | 651         | 2855       | 0.23 | 0.396                               | 0.009 | 0.0533                              | 0.0010 | 0.84 |
| 16180411f  | prism/uniform      | core             | 98          | 447         | 1811       | 0.25 | 0.422                               | 0.010 | 0.0538                              | 0.0010 | 0.78 |
| 17180411f  | prism/uniform      | rim              | 83          | 481         | 1595       | 0.30 | 0.408                               | 0.010 | 0.0534                              | 0.0010 | 0.72 |
| 18180411f  | prism/uniform      | rim              | 96          | 435         | 1840       | 0.24 | 0.400                               | 0.010 | 0.0533                              | 0.0010 | 0.77 |
| 07190411a  | prism/uniform      | core             | 67          | 236         | 1265       | 0.19 | 0.405                               | 0.011 | 0.0536                              | 0.0014 | 0.96 |
| 08190411a  | prism/uniform      | rim              | 107         | 426         | 2014       | 0.21 | 0.394                               | 0.010 | 0.0536                              | 0.0014 | 0.96 |
| 09190411a  | prism/uniform      | core             | 85          | 331         | 1632       | 0.20 | 0.413                               | 0.011 | 0.0536                              | 0.0014 | 0.97 |
| 10190411a  | prism/uniform      | core             | 133         | 417         | 2587       | 0.16 | 0.412                               | 0.011 | 0.0536                              | 0.0014 | 0.98 |
| 12190411a  | prism/uniform      | core             | 973         | 12424       | 15797      | 0.79 | 0.396                               | 0.010 | 0.0534                              | 0.0013 | 0.99 |
| 16190411a  | prism/uniform      | core             | 130         | 986         | 2248       | 0.44 | 0.464                               | 0.012 | 0.0542                              | 0.0013 | 0.96 |
| 19190411a  | prism/uniform      | rim              | 64          | 292         | 1220       | 0.24 | 0.412                               | 0.011 | 0.0536                              | 0.0013 | 0.93 |
| 20190411a  | prism/uniform      | rim              | 112         | 535         | 2090       | 0.26 | 0.440                               | 0.012 | 0.0537                              | 0.0013 | 0.93 |
| 19180411e  | round/zoned        | rim              | 93          | 358         | 1654       | 0.22 | 0.446                               | 0.013 | 0.0578                              | 0.0011 | 0.69 |
| 05190411a  | round/uniform      | rim              | 104         | 514         | 1824       | 0.28 | 0.422                               | 0.011 | 0.0569                              | 0.0015 | 0.97 |
| 06190411a  | round/uniform      | core             | 82          | 382         | 1451       | 0.26 | 0.432                               | 0.011 | 0.0557                              | 0.0014 | 0.97 |
| 11190411a  | round/uniform      | core             | 82          | 407         | 1488       | 0.27 | 0.416                               | 0.011 | 0.0563                              | 0.0014 | 0.96 |
| 17190411a  | round/uniform      | core             | 94          | 400         | 1670       | 0.24 | 0.425                               | 0.011 | 0.0561                              | 0.0014 | 0.95 |
| 18190411a  | round/uniform      | core             | 135         | 864         | 2313       | 0.37 | 0.421                               | 0.011 | 0.0560                              | 0.0014 | 0.95 |
| 21190411a  | round/uniform      | core             | 79          | 318         | 1458       | 0.22 | 0.414                               | 0.011 | 0.0558                              | 0.0014 | 0.93 |
| 22190411a  | round/uniform      | rim              | 108         | 411         | 1974       | 0.21 | 0.427                               | 0.012 | 0.0558                              | 0.0014 | 0.90 |
| <b>CS1</b> |                    |                  |             |             |            |      |                                     |       |                                     |        |      |
| 05190411b  | prism/uniform      | rim              | 98          | 430         | 1833       | 0.23 | 0.398                               | 0.010 | 0.0537                              | 0.0013 | 0.97 |
| 08190411b  | prism/uniform      | rim              | 113         | 552         | 2103       | 0.26 | 0.392                               | 0.010 | 0.0536                              | 0.0013 | 0.96 |
| 09190411b  | prism/uniform      | rim              | 133         | 717         | 2497       | 0.29 | 0.393                               | 0.010 | 0.0539                              | 0.0013 | 0.96 |
| 10190411b  | prism/uniform      | core             | 121         | 592         | 2311       | 0.26 | 0.394                               | 0.010 | 0.0535                              | 0.0013 | 0.96 |
| 11190411b  | prism/uniform      | rim              | 108         | 472         | 2060       | 0.23 | 0.409                               | 0.010 | 0.0535                              | 0.0013 | 0.96 |
| 15190411b  | prism/uniform      | core             | 189         | 1094        | 3447       | 0.32 | 0.431                               | 0.010 | 0.0536                              | 0.0013 | 0.97 |
| 17190411b  | prism/uniform      | rim              | 108         | 565         | 2000       | 0.28 | 0.419                               | 0.010 | 0.0537                              | 0.0013 | 0.95 |
| 18190411b  | prism/uniform      | rim              | 102         | 552         | 1918       | 0.29 | 0.400                               | 0.010 | 0.0533                              | 0.0012 | 0.92 |
| 19190411b  | prism/uniform      | rim              | 106         | 451         | 2017       | 0.22 | 0.394                               | 0.010 | 0.0536                              | 0.0012 | 0.93 |
| 20190411b  | prism/uniform      | core             | 95          | 432         | 1806       | 0.24 | 0.392                               | 0.010 | 0.0535                              | 0.0012 | 0.92 |
| 22190411b  | round/uniform      | rim              | 151         | 763         | 2838       | 0.27 | 0.400                               | 0.010 | 0.0535                              | 0.0012 | 0.93 |
| 26190411b  | prism/uniform      | rim              | 137         | 514         | 2601       | 0.20 | 0.401                               | 0.010 | 0.0536                              | 0.0012 | 0.93 |
| 27190411b  | prism/uniform      | core             | 115         | 452         | 2176       | 0.21 | 0.406                               | 0.010 | 0.0536                              | 0.0012 | 0.90 |
| 28190411b  | prism/uniform      | rim              | 100         | 438         | 1878       | 0.23 | 0.404                               | 0.010 | 0.0537                              | 0.0012 | 0.91 |
| 29190411b  | prism/uniform      | core             | 94          | 511         | 1730       | 0.29 | 0.409                               | 0.010 | 0.0536                              | 0.0012 | 0.91 |
| 30190411b  | prism/uniform      | core             | 138         | 677         | 2524       | 0.27 | 0.447                               | 0.011 | 0.0537                              | 0.0012 | 0.91 |
| 05190411c  | prism/uniform      | core             | 83          | 343         | 1585       | 0.22 | 0.401                               | 0.010 | 0.0536                              | 0.0012 | 0.94 |
| 06190411c  | round/uniform      | rim              | 124         | 552         | 2343       | 0.24 | 0.396                               | 0.009 | 0.0536                              | 0.0012 | 0.96 |
| 08190411c  | prism/uniform      | rim              | 358         | 4870        | 6900       | 0.71 | 0.488                               | 0.012 | 0.0538                              | 0.0012 | 0.94 |
| 12190411c  | prism/uniform      | core             | 72          | 274         | 1372       | 0.20 | 0.410                               | 0.010 | 0.0538                              | 0.0012 | 0.90 |
| 19190411c  | prism/uniform      | rim              | 108         | 576         | 1998       | 0.29 | 0.437                               | 0.012 | 0.0538                              | 0.0012 | 0.84 |
| 20190411c  | prism/uniform      | core             | 101         | 506         | 1853       | 0.27 | 0.445                               | 0.011 | 0.0535                              | 0.0012 | 0.93 |
| 21190411c  | prism/uniform      | rim              | 107         | 418         | 2020       | 0.21 | 0.415                               | 0.011 | 0.0537                              | 0.0012 | 0.87 |
| 22190411c  | prism/uniform      | core             | 110         | 485         | 2022       | 0.24 | 0.444                               | 0.012 | 0.0537                              | 0.0012 | 0.86 |
| 25190411c  | prism/uniform      | rim              | 107         | 536         | 2022       | 0.27 | 0.404                               | 0.010 | 0.0532                              | 0.0012 | 0.91 |
| 26190411c  | prism/uniform      | rim              | 89          | 393         | 1645       | 0.24 | 0.431                               | 0.011 | 0.0538                              | 0.0012 | 0.90 |
| 29190411c  | prism/uniform      | core             | 109         | 485         | 2059       | 0.24 | 0.409                               | 0.010 | 0.0537                              | 0.0012 | 0.90 |

|             |                 |      |     |      |      |      |       |       |        |        |      |
|-------------|-----------------|------|-----|------|------|------|-------|-------|--------|--------|------|
| 30190411c   | prism/uniform   | core | 108 | 447  | 2054 | 0.22 | 0.402 | 0.010 | 0.0538 | 0.0012 | 0.89 |
| 31190411c   | prism/uniform   | core | 132 | 545  | 2532 | 0.22 | 0.401 | 0.010 | 0.0535 | 0.0012 | 0.89 |
| 32190411c   | prism/uniform   | core | 78  | 335  | 1486 | 0.23 | 0.417 | 0.011 | 0.0535 | 0.0012 | 0.88 |
| 21190411b   | round/uniform   | core | 109 | 535  | 1949 | 0.27 | 0.410 | 0.010 | 0.0562 | 0.0013 | 0.93 |
| 32190411b   | round/uniform   | rim  | 228 | 1734 | 3801 | 0.46 | 0.430 | 0.011 | 0.0559 | 0.0013 | 0.91 |
| 17190411c   | round/uniform   | rim  | 90  | 388  | 1505 | 0.26 | 0.473 | 0.012 | 0.0604 | 0.0014 | 0.93 |
| 18190411c   | round/uniform   | rim  | 76  | 326  | 1254 | 0.26 | 0.479 | 0.012 | 0.0606 | 0.0014 | 0.92 |
| <b>BR14</b> |                 |      |     |      |      |      |       |       |        |        |      |
| 06180411b   | prism/uniform   | core | 47  | 302  | 847  | 0.36 | 0.397 | 0.010 | 0.0539 | 0.0012 | 0.90 |
| 08180411b   | prism/uniform   | core | 68  | 380  | 1206 | 0.32 | 0.420 | 0.012 | 0.0542 | 0.0013 | 0.79 |
| 12180411b   | prism/uniform   | rim  | 96  | 558  | 1735 | 0.32 | 0.437 | 0.013 | 0.0540 | 0.0012 | 0.77 |
| 15180411b   | prism/uniform   | core | 87  | 455  | 1405 | 0.32 | 0.647 | 0.015 | 0.0557 | 0.0012 | 0.94 |
| 21180411b   | prism/uniform   | core | 65  | 316  | 1192 | 0.26 | 0.444 | 0.012 | 0.0542 | 0.0012 | 0.84 |
| 22180411b   | prism/uniform   | core | 58  | 389  | 1048 | 0.37 | 0.400 | 0.010 | 0.0542 | 0.0012 | 0.84 |
| 25180411b   | prism/uniform   | core | 119 | 527  | 1858 | 0.28 | 0.790 | 0.019 | 0.0544 | 0.0012 | 0.92 |
| 27180411b   | prism/uniform   | rim  | 36  | 293  | 579  | 0.51 | 0.567 | 0.019 | 0.0542 | 0.0012 | 0.66 |
| 09180411c   | prism/uniform   | rim  | 131 | 577  | 2449 | 0.24 | 0.433 | 0.009 | 0.0538 | 0.0011 | 0.92 |
| 11180411c   | prism/uniform   | core | 44  | 237  | 815  | 0.29 | 0.390 | 0.009 | 0.0534 | 0.0011 | 0.87 |
| 15180411c   | prism/uniform   | rim  | 55  | 253  | 1026 | 0.25 | 0.410 | 0.009 | 0.0538 | 0.0011 | 0.87 |
| 16180411c   | prism/uniform   | rim  | 43  | 114  | 842  | 0.14 | 0.407 | 0.011 | 0.0535 | 0.0011 | 0.76 |
| 19180411c   | prism/uniform   | rim  | 131 | 583  | 2429 | 0.24 | 0.433 | 0.010 | 0.0544 | 0.0011 | 0.90 |
| 21180411c   | prism/uniform   | core | 32  | 131  | 614  | 0.21 | 0.400 | 0.010 | 0.0533 | 0.0011 | 0.82 |
| 31180411c   | prism/uniform   | core | 38  | 217  | 706  | 0.31 | 0.405 | 0.014 | 0.0531 | 0.0011 | 0.60 |
| <b>BA11</b> |                 |      |     |      |      |      |       |       |        |        |      |
| 05180411a   | prism/uniform   | core | 78  | 472  | 1404 | 0.34 | 0.402 | 0.012 | 0.0537 | 0.0015 | 0.97 |
| 07180411a   | prism/uniform   | core | 73  | 449  | 1293 | 0.35 | 0.404 | 0.011 | 0.0536 | 0.0015 | 0.99 |
| 08180411a   | prism/uniform   | core | 64  | 363  | 1138 | 0.32 | 0.435 | 0.012 | 0.0536 | 0.0015 | 0.98 |
| 12180411a   | prism/uniform   | rim  | 70  | 405  | 1298 | 0.31 | 0.393 | 0.011 | 0.0535 | 0.0014 | 0.96 |
| 15180411a   | prism/uniform   | core | 75  | 516  | 1328 | 0.39 | 0.397 | 0.011 | 0.0535 | 0.0014 | 0.97 |
| 16180411a   | prism/uniform   | core | 62  | 378  | 1116 | 0.34 | 0.409 | 0.011 | 0.0534 | 0.0014 | 0.95 |
| 21180411a   | prism/uniform   | core | 87  | 499  | 1625 | 0.31 | 0.397 | 0.011 | 0.0536 | 0.0014 | 0.94 |
| 26180411a   | prism/uniform   | core | 59  | 340  | 1060 | 0.32 | 0.413 | 0.011 | 0.0537 | 0.0013 | 0.93 |
| 27180411a   | prism/uniform   | core | 60  | 303  | 1058 | 0.29 | 0.478 | 0.013 | 0.0535 | 0.0013 | 0.89 |
| 30180411b   | prism/uniform   | rim  | 78  | 473  | 1395 | 0.34 | 0.457 | 0.011 | 0.0541 | 0.0011 | 0.88 |
| 31180411b   | prism/uniform   | rim  | 73  | 437  | 1332 | 0.33 | 0.426 | 0.010 | 0.0539 | 0.0011 | 0.87 |
| 37180411b   | prism/uniform   | rim  | 95  | 569  | 1788 | 0.32 | 0.421 | 0.012 | 0.0525 | 0.0011 | 0.72 |
| 38180411b   | prism/uniform   | core | 50  | 256  | 929  | 0.28 | 0.420 | 0.010 | 0.0540 | 0.0011 | 0.83 |
| <b>CO1</b>  |                 |      |     |      |      |      |       |       |        |        |      |
| 05180411e   | prism/uniform   | core | 67  | 402  | 1233 | 0.33 | 0.395 | 0.008 | 0.0539 | 0.0010 | 0.90 |
| 08180411e   | prism/uniform   | core | 35  | 210  | 619  | 0.34 | 0.463 | 0.011 | 0.0540 | 0.0010 | 0.83 |
| 09180411e   | prism/uniform   | core | 74  | 473  | 1323 | 0.36 | 0.430 | 0.010 | 0.0540 | 0.0010 | 0.86 |
| 25180411e   | prism/uniform   | core | 35  | 233  | 627  | 0.37 | 0.451 | 0.011 | 0.0534 | 0.0010 | 0.80 |
| 26180411e   | prism/uniform   | core | 75  | 473  | 1345 | 0.35 | 0.418 | 0.013 | 0.0541 | 0.0011 | 0.65 |
| <b>BAB4</b> |                 |      |     |      |      |      |       |       |        |        |      |
| 05190411e   | prism/uniform   | core | 87  | 802  | 1443 | 0.56 | 0.405 | 0.011 | 0.0553 | 0.0014 | 0.95 |
| 06190411e   | prism/uniform   | core | 71  | 846  | 1118 | 0.76 | 0.406 | 0.011 | 0.0550 | 0.0014 | 0.93 |
| 08190411e   | prism/uniform   | rim  | 47  | 428  | 771  | 0.56 | 0.409 | 0.011 | 0.0550 | 0.0014 | 0.93 |
| 09190411e   | prism/uniform   | rim  | 34  | 293  | 578  | 0.51 | 0.415 | 0.012 | 0.0551 | 0.0014 | 0.91 |
| 10190411e   | prism/uniform   | core | 32  | 263  | 556  | 0.47 | 0.417 | 0.012 | 0.0549 | 0.0014 | 0.91 |
| 12190411e   | prism/uniform   | core | 45  | 405  | 770  | 0.53 | 0.407 | 0.011 | 0.0549 | 0.0014 | 0.92 |
| 17190411e   | prism/uniform   | core | 44  | 432  | 718  | 0.60 | 0.406 | 0.011 | 0.0551 | 0.0014 | 0.91 |
| 20190411e   | prism/uniform   | core | 60  | 492  | 1034 | 0.48 | 0.449 | 0.012 | 0.0550 | 0.0014 | 0.89 |
| 21190411e   | prism/uniform   | rim  | 95  | 824  | 1654 | 0.50 | 0.403 | 0.011 | 0.0547 | 0.0013 | 0.93 |
| 22190411e   | prism/uniform   | rim  | 90  | 772  | 1538 | 0.50 | 0.407 | 0.011 | 0.0550 | 0.0013 | 0.93 |
| 26190411e   | prism/uniform   | rim  | 43  | 397  | 714  | 0.56 | 0.409 | 0.012 | 0.0551 | 0.0013 | 0.84 |
| 27190411e   | prism/uniform   | rim  | 61  | 526  | 1044 | 0.50 | 0.406 | 0.011 | 0.0549 | 0.0013 | 0.90 |
| 30190411e   | prism/uniform   | rim  | 83  | 766  | 1407 | 0.54 | 0.417 | 0.011 | 0.0551 | 0.0013 | 0.91 |
| 31190411e   | prism/uniform   | core | 107 | 947  | 1800 | 0.53 | 0.408 | 0.011 | 0.0553 | 0.0013 | 0.91 |
| <b>BAB5</b> |                 |      |     |      |      |      |       |       |        |        |      |
| 05190411f   | euهدral/uniform | core | 57  | 475  | 992  | 0.48 | 0.400 | 0.010 | 0.0544 | 0.0013 | 0.92 |
| 07190411f   | euهدral/uniform | core | 85  | 641  | 1484 | 0.43 | 0.401 | 0.010 | 0.0544 | 0.0013 | 0.94 |
| 08190411f   | euهدral/uniform | core | 94  | 606  | 1644 | 0.37 | 0.426 | 0.012 | 0.0548 | 0.0013 | 0.80 |
| 09190411f   | euهدral/uniform | core | 97  | 713  | 1707 | 0.42 | 0.426 | 0.011 | 0.0548 | 0.0013 | 0.93 |
| 10190411f   | euهدral/uniform | rim  | 61  | 462  | 1055 | 0.44 | 0.425 | 0.011 | 0.0553 | 0.0013 | 0.91 |
| 11190411f   | euهدral/uniform | core | 63  | 340  | 1161 | 0.29 | 0.412 | 0.010 | 0.0546 | 0.0013 | 0.92 |
| 12190411f   | euهدral/uniform | rim  | 64  | 347  | 1162 | 0.30 | 0.409 | 0.010 | 0.0548 | 0.0013 | 0.90 |
| 15190411f   | euهدral/uniform | rim  | 74  | 546  | 1291 | 0.42 | 0.403 | 0.010 | 0.0550 | 0.0013 | 0.91 |

|            |                 |      |     |     |      |      |       |       |        |        |      |
|------------|-----------------|------|-----|-----|------|------|-------|-------|--------|--------|------|
| 16190411f  | euهدral/uniform | core | 69  | 504 | 1201 | 0.42 | 0.409 | 0.010 | 0.0548 | 0.0013 | 0.92 |
| 17190411f  | euهدral/uniform | core | 43  | 342 | 746  | 0.46 | 0.409 | 0.012 | 0.0550 | 0.0013 | 0.79 |
| 18190411f  | euهدral/uniform | rim  | 81  | 616 | 1414 | 0.44 | 0.409 | 0.010 | 0.0547 | 0.0012 | 0.90 |
| 19190411f  | euهدral/uniform | core | 71  | 539 | 1226 | 0.44 | 0.441 | 0.016 | 0.0547 | 0.0013 | 0.65 |
| 20190411f  | euهدral/uniform | core | 111 | 932 | 1853 | 0.50 | 0.422 | 0.011 | 0.0551 | 0.0013 | 0.89 |
| 22190411f  | euهدral/uniform | core | 88  | 684 | 1523 | 0.45 | 0.418 | 0.011 | 0.0546 | 0.0012 | 0.89 |
| 28190411f  | euهدral/uniform | rim  | 48  | 332 | 827  | 0.40 | 0.436 | 0.012 | 0.0548 | 0.0012 | 0.85 |
| 31190411f  | euهدral/uniform | rim  | 60  | 433 | 1065 | 0.41 | 0.404 | 0.011 | 0.0545 | 0.0012 | 0.83 |
| 32190411f  | euهدral/uniform | rim  | 84  | 601 | 1479 | 0.41 | 0.411 | 0.011 | 0.0547 | 0.0012 | 0.85 |
| 05200411c  | euهدral/zoned   | core | 84  | 617 | 1434 | 0.43 | 0.426 | 0.014 | 0.0555 | 0.0018 | 0.97 |
| 07200411c  | euهدral/uniform | core | 59  | 464 | 991  | 0.47 | 0.421 | 0.014 | 0.0557 | 0.0018 | 0.97 |
| 08200411c  | euهدral/uniform | rim  | 71  | 534 | 1201 | 0.45 | 0.413 | 0.014 | 0.0559 | 0.0018 | 0.97 |
| 10200411c  | euهدral/uniform | rim  | 74  | 577 | 1261 | 0.46 | 0.422 | 0.015 | 0.0558 | 0.0018 | 0.93 |
| 11200411c  | euهدral/uniform | core | 76  | 617 | 1306 | 0.47 | 0.408 | 0.015 | 0.0557 | 0.0018 | 0.89 |
| 12200411c  | euهدral/uniform | core | 91  | 693 | 1565 | 0.44 | 0.409 | 0.014 | 0.0554 | 0.0018 | 0.97 |
| 16200411c  | euهدral/zoned   | rim  | 49  | 328 | 837  | 0.39 | 0.425 | 0.015 | 0.0559 | 0.0018 | 0.94 |
| 17200411c  | euهدral/uniform | rim  | 41  | 309 | 699  | 0.44 | 0.421 | 0.015 | 0.0552 | 0.0018 | 0.92 |
| 18200411c  | euهدral/zoned   | core | 74  | 576 | 1226 | 0.47 | 0.423 | 0.014 | 0.0564 | 0.0018 | 0.95 |
| 19200411c  | euهدral/zoned   | core | 64  | 472 | 1086 | 0.43 | 0.431 | 0.014 | 0.0559 | 0.0018 | 0.95 |
| 20200411c  | euهدral/uniform | core | 62  | 524 | 1041 | 0.50 | 0.409 | 0.014 | 0.0553 | 0.0018 | 0.94 |
| 21200411c  | euهدral/zoned   | core | 67  | 479 | 1111 | 0.43 | 0.439 | 0.015 | 0.0565 | 0.0018 | 0.94 |
| 22200411c  | euهدral/uniform | core | 124 | 849 | 2163 | 0.39 | 0.412 | 0.014 | 0.0556 | 0.0018 | 0.93 |
| 26200411c  | euهدral/uniform | core | 71  | 513 | 1192 | 0.43 | 0.428 | 0.015 | 0.0555 | 0.0018 | 0.93 |
| 27200411c  | euهدral/uniform | core | 61  | 449 | 1038 | 0.43 | 0.431 | 0.015 | 0.0555 | 0.0018 | 0.93 |
| 28200411c  | euهدral/zoned   | core | 88  | 646 | 1480 | 0.44 | 0.431 | 0.015 | 0.0559 | 0.0018 | 0.94 |
| 29200411c  | euهدral/uniform | rim  | 66  | 502 | 1143 | 0.44 | 0.409 | 0.014 | 0.0554 | 0.0018 | 0.93 |
| 30200411c  | euهدral/uniform | core | 80  | 587 | 1398 | 0.42 | 0.411 | 0.014 | 0.0556 | 0.0018 | 0.92 |
| 31200411c  | euهدral/uniform | core | 82  | 620 | 1409 | 0.44 | 0.421 | 0.015 | 0.0551 | 0.0018 | 0.92 |
| <b>GG4</b> |                 |      |     |     |      |      |       |       |        |        |      |
| 06200411a  | round/uniform   | rim  | 64  | 274 | 1107 | 0.25 | 0.571 | 0.019 | 0.0537 | 0.0017 | 0.98 |
| 07190411g  |                 | core | 91  | 138 | 1453 | 0.10 | 0.911 | 0.022 | 0.0549 | 0.0012 | 0.91 |
| 10200411a  | prism/uniform   | core | 93  | 360 | 1775 | 0.20 | 0.519 | 0.017 | 0.0530 | 0.0017 | 0.96 |
| 11200411a  | prism/uniform   | core | 88  | 686 | 1244 | 0.55 | 0.537 | 0.019 | 0.0519 | 0.0017 | 0.93 |
| 19200411b  | prism/uniform   | core | 107 | 85  | 2297 | 0.04 | 0.377 | 0.013 | 0.0505 | 0.0016 | 0.96 |
| 25200411b  | prism/uniform   | core | 45  | 254 | 788  | 0.32 | 0.416 | 0.015 | 0.0524 | 0.0017 | 0.89 |
| 28200411b  | prism/uniform   | rim  | 74  | 98  | 1535 | 0.06 | 0.393 | 0.014 | 0.0514 | 0.0017 | 0.91 |
| 36200411b  |                 | core | 106 | 155 | 2207 | 0.07 | 0.379 | 0.013 | 0.0512 | 0.0016 | 0.93 |
| 38200411b  | prism/uniform   | core | 78  | 161 | 1556 | 0.10 | 0.419 | 0.014 | 0.0520 | 0.0017 | 0.95 |
| 41200411b  | prism/uniform   | core | 41  | 37  | 883  | 0.04 | 0.379 | 0.015 | 0.0509 | 0.0017 | 0.84 |
| 10190411g  | prism/uniform   | core | 93  | 360 | 1775 | 0.20 | 0.467 | 0.012 | 0.0514 | 0.0012 | 0.87 |
| 12190411g  | prism/zoned     | rim  | 11  | 15  | 54   | 0.27 | 5.489 | 0.158 | 0.0907 | 0.0022 | 0.84 |
| 05200411a  | round/uniform   | rim  | 155 | 343 | 2083 | 0.16 | 0.508 | 0.016 | 0.0570 | 0.0018 | 0.99 |
| 09200411a  | round/uniform   | core | 71  | 183 | 1042 | 0.17 | 0.485 | 0.017 | 0.0567 | 0.0018 | 0.93 |
| 07200411b  | round/uniform   | rim  | 88  | 89  | 1673 | 0.05 | 0.446 | 0.015 | 0.0559 | 0.0018 | 0.98 |
| 10200411b  | round/uniform   | core | 74  | 117 | 1333 | 0.09 | 0.499 | 0.017 | 0.0575 | 0.0018 | 0.95 |
| 31200411b  | round/uniform   | core | 55  | 55  | 1084 | 0.05 | 0.412 | 0.014 | 0.0549 | 0.0018 | 0.92 |
| 32200411b  | round/uniform   | core | 218 | 399 | 4185 | 0.09 | 0.406 | 0.013 | 0.0551 | 0.0018 | 0.96 |
| 42200411b  | round/uniform   | core | 63  | 70  | 1136 | 0.06 | 0.495 | 0.017 | 0.0583 | 0.0019 | 0.92 |
| 08190411g  | round/uniform   | rim  | 60  | 92  | 1112 | 0.08 | 0.498 | 0.013 | 0.0567 | 0.0013 | 0.88 |
| 07200411a  | prism/zoned     | core | 91  | 138 | 1453 | 0.09 | 0.526 | 0.017 | 0.0665 | 0.0021 | 0.97 |
| 08200411a  | prism/zoned     | core | 60  | 92  | 1112 | 0.08 | 0.547 | 0.019 | 0.0669 | 0.0021 | 0.92 |
| 12200411a  | prism/zoned     | core | 11  | 15  | 54   | 0.27 | 0.494 | 0.017 | 0.0631 | 0.0020 | 0.94 |
| 05200411b  | prism/zoned     | core | 31  | 45  | 449  | 0.10 | 0.570 | 0.019 | 0.0726 | 0.0023 | 0.95 |
| 06200411b  | prism/zoned     | core | 31  | 88  | 461  | 0.19 | 0.559 | 0.020 | 0.0682 | 0.0022 | 0.92 |
| 08200411b  | prism/zoned     | core | 18  | 61  | 262  | 0.23 | 0.565 | 0.023 | 0.0679 | 0.0022 | 0.79 |
| 09200411b  | prism/zoned     | core | 24  | 57  | 356  | 0.16 | 0.528 | 0.019 | 0.0688 | 0.0022 | 0.89 |
| 12200411b  | round/uniform   | rim  | 105 | 88  | 1597 | 0.06 | 0.550 | 0.018 | 0.0700 | 0.0022 | 0.97 |
| 15200411b  | prism/zoned     | core | 25  | 73  | 348  | 0.21 | 0.574 | 0.020 | 0.0738 | 0.0024 | 0.93 |
| 26200411b  | prism/zoned     | core | 27  | 36  | 380  | 0.10 | 0.581 | 0.020 | 0.0750 | 0.0024 | 0.92 |
| 27200411b  | round/uniform   | core | 35  | 47  | 512  | 0.09 | 0.581 | 0.020 | 0.0725 | 0.0023 | 0.93 |
| 30200411b  | prism/zoned     | core | 16  | 33  | 229  | 0.15 | 0.582 | 0.022 | 0.0736 | 0.0024 | 0.87 |
| 40200411b  | prism/zoned     | core | 37  | 35  | 552  | 0.06 | 0.564 | 0.020 | 0.0716 | 0.0023 | 0.91 |
| 35200411b  | prism/zoned     | core | 16  | 47  | 262  | 0.18 | 0.494 | 0.018 | 0.0635 | 0.0021 | 0.87 |
| 39200411b  | prism/zoned     | core | 23  | 62  | 372  | 0.17 | 0.495 | 0.019 | 0.0636 | 0.0021 | 0.84 |
| 18200411b  | prism/zoned     | core | 159 | 392 | 2610 | 0.15 | 0.575 | 0.019 | 0.0605 | 0.0019 | 0.96 |
| 06190411g  | round/uniform   | rim  | 64  | 274 | 1107 | 0.25 | 0.570 | 0.014 | 0.0559 | 0.0012 | 0.91 |

|                  |               |      |    |     |      |      |       |       |        |        |      |
|------------------|---------------|------|----|-----|------|------|-------|-------|--------|--------|------|
| <i>09190411g</i> | round/uniform | core | 71 | 183 | 1042 | 0.18 | 0.631 | 0.016 | 0.0653 | 0.0015 | 0.87 |
|------------------|---------------|------|----|-----|------|------|-------|-------|--------|--------|------|

In italic, analysis of inherited zircons.

| Age (Ma)                            |     |                                      | Isotopic ratios |                                     |         |                                     |         |                                      |         |
|-------------------------------------|-----|--------------------------------------|-----------------|-------------------------------------|---------|-------------------------------------|---------|--------------------------------------|---------|
| <sup>206</sup> Pb/ <sup>238</sup> U | 2 σ | <sup>207</sup> Pb/ <sup>206</sup> Pb | 1 σ             | <sup>206</sup> Pb/ <sup>238</sup> U | 1 σ     | <sup>207</sup> Pb/ <sup>235</sup> U | 1 σ     | <sup>208</sup> Pb/ <sup>232</sup> Th | 1 σ     |
| 336.9                               | 6.3 | 0.05504                              | 0.00064         | 0.05365                             | 0.00051 | 0.40727                             | 0.00452 | 0.01594                              | 0.00020 |
| 337.4                               | 6.3 | 0.05646                              | 0.00063         | 0.05374                             | 0.00051 | 0.41839                             | 0.00443 | 0.01703                              | 0.00021 |
| 339.7                               | 6.3 | 0.05372                              | 0.00060         | 0.05411                             | 0.00052 | 0.40092                             | 0.00426 | 0.01687                              | 0.00021 |
| 338.3                               | 6.2 | 0.05397                              | 0.00061         | 0.05387                             | 0.00051 | 0.40097                             | 0.00430 | 0.01648                              | 0.00022 |
| 338.9                               | 6.3 | 0.05489                              | 0.00063         | 0.05397                             | 0.00051 | 0.40851                             | 0.00446 | 0.01663                              | 0.00023 |
| 339.4                               | 6.4 | 0.05734                              | 0.00081         | 0.05406                             | 0.00052 | 0.42743                             | 0.00576 | 0.01860                              | 0.00028 |
| 337.3                               | 6.3 | 0.05907                              | 0.00075         | 0.05371                             | 0.00051 | 0.43757                             | 0.00526 | 0.01937                              | 0.00029 |
| 338.3                               | 6.2 | 0.05378                              | 0.00062         | 0.05388                             | 0.00051 | 0.39962                             | 0.00436 | 0.01586                              | 0.00023 |
| 339.8                               | 6.2 | 0.05360                              | 0.00065         | 0.05412                             | 0.00051 | 0.40003                             | 0.00456 | 0.01698                              | 0.00027 |
| 339.0                               | 6.2 | 0.05315                              | 0.00064         | 0.05400                             | 0.00051 | 0.39578                             | 0.00451 | 0.01699                              | 0.00028 |
| 337.2                               | 6.2 | 0.05370                              | 0.00064         | 0.05371                             | 0.00050 | 0.39771                             | 0.00441 | 0.01706                              | 0.00028 |
| 337.8                               | 6.2 | 0.05347                              | 0.00068         | 0.05380                             | 0.00051 | 0.39668                             | 0.00476 | 0.01703                              | 0.00029 |
| 335.8                               | 6.1 | 0.05419                              | 0.00065         | 0.05348                             | 0.00050 | 0.39960                             | 0.00445 | 0.01722                              | 0.00026 |
| 336.2                               | 6.1 | 0.05912                              | 0.00072         | 0.05353                             | 0.00050 | 0.43646                             | 0.00492 | 0.01778                              | 0.00028 |
| 334.4                               | 6.0 | 0.05390                              | 0.00064         | 0.05325                             | 0.00049 | 0.39579                             | 0.00436 | 0.01683                              | 0.00028 |
| 338.0                               | 6.1 | 0.05682                              | 0.00073         | 0.05384                             | 0.00050 | 0.42187                             | 0.00503 | 0.01904                              | 0.00036 |
| 335.4                               | 6.0 | 0.05542                              | 0.00076         | 0.05340                             | 0.00049 | 0.40813                             | 0.00517 | 0.01325                              | 0.00026 |
| 334.7                               | 6.0 | 0.05445                              | 0.00070         | 0.05330                             | 0.00049 | 0.40020                             | 0.00476 | 0.01719                              | 0.00034 |
| 336.8                               | 8.4 | 0.05475                              | 0.00060         | 0.05364                             | 0.00068 | 0.40501                             | 0.00537 | 0.01725                              | 0.00023 |
| 336.4                               | 8.3 | 0.05330                              | 0.00058         | 0.05357                             | 0.00068 | 0.39376                             | 0.00520 | 0.01575                              | 0.00021 |
| 336.5                               | 8.3 | 0.05587                              | 0.00061         | 0.05358                             | 0.00068 | 0.41291                             | 0.00543 | 0.01766                              | 0.00023 |
| 336.6                               | 8.3 | 0.05569                              | 0.00060         | 0.05361                             | 0.00068 | 0.41178                             | 0.00534 | 0.01774                              | 0.00024 |
| 335.2                               | 8.2 | 0.05373                              | 0.00056         | 0.05338                             | 0.00067 | 0.39561                             | 0.00502 | 0.01583                              | 0.00021 |
| 340.1                               | 8.2 | 0.06204                              | 0.00068         | 0.05417                             | 0.00067 | 0.46353                             | 0.00599 | 0.01618                              | 0.00023 |
| 336.5                               | 8.1 | 0.05579                              | 0.00064         | 0.05358                             | 0.00066 | 0.41226                             | 0.00546 | 0.01697                              | 0.00025 |
| 337.0                               | 8.0 | 0.05945                              | 0.00069         | 0.05367                             | 0.00066 | 0.44007                             | 0.00583 | 0.01899                              | 0.00029 |
| 362.0                               | 6.8 | 0.05601                              | 0.00082         | 0.05777                             | 0.00056 | 0.44614                             | 0.00627 | 0.01841                              | 0.00029 |
| 357.0                               | 8.9 | 0.05370                              | 0.00058         | 0.05694                             | 0.00073 | 0.42172                             | 0.00555 | 0.01765                              | 0.00023 |
| 349.5                               | 8.7 | 0.05628                              | 0.00060         | 0.05572                             | 0.00071 | 0.43249                             | 0.00566 | 0.01839                              | 0.00024 |
| 353.3                               | 8.6 | 0.05357                              | 0.00059         | 0.05633                             | 0.00071 | 0.41619                             | 0.00545 | 0.01585                              | 0.00021 |
| 351.7                               | 8.4 | 0.05493                              | 0.00061         | 0.05608                             | 0.00069 | 0.42484                             | 0.00552 | 0.01801                              | 0.00026 |
| 351.1                               | 8.4 | 0.05457                              | 0.00060         | 0.05597                             | 0.00069 | 0.42129                             | 0.00545 | 0.01710                              | 0.00025 |
| 350.0                               | 8.3 | 0.05379                              | 0.00062         | 0.05579                             | 0.00068 | 0.41390                             | 0.00545 | 0.01731                              | 0.00027 |
| 350.2                               | 8.3 | 0.05548                              | 0.00066         | 0.05583                             | 0.00068 | 0.42717                             | 0.00578 | 0.01830                              | 0.00029 |
| 337.4                               | 7.8 | 0.05375                              | 0.00058         | 0.05373                             | 0.00064 | 0.39830                             | 0.00490 | 0.01697                              | 0.00021 |
| 336.8                               | 7.7 | 0.05294                              | 0.00057         | 0.05363                             | 0.00063 | 0.39160                             | 0.00481 | 0.01663                              | 0.00021 |
| 338.3                               | 7.8 | 0.05294                              | 0.00057         | 0.05388                             | 0.00063 | 0.39332                             | 0.00481 | 0.01648                              | 0.00021 |
| 336.1                               | 7.7 | 0.05334                              | 0.00057         | 0.05351                             | 0.00063 | 0.39366                             | 0.00482 | 0.01642                              | 0.00021 |
| 336.0                               | 7.7 | 0.05540                              | 0.00060         | 0.05350                             | 0.00063 | 0.40875                             | 0.00503 | 0.01806                              | 0.00023 |
| 336.5                               | 7.7 | 0.05826                              | 0.00063         | 0.05358                             | 0.00063 | 0.43051                             | 0.00524 | 0.01845                              | 0.00024 |
| 337.2                               | 7.7 | 0.05658                              | 0.00062         | 0.05370                             | 0.00063 | 0.41902                             | 0.00518 | 0.01800                              | 0.00024 |
| 335.0                               | 7.6 | 0.05440                              | 0.00062         | 0.05334                             | 0.00062 | 0.40022                             | 0.00508 | 0.01648                              | 0.00023 |
| 336.8                               | 7.6 | 0.05330                              | 0.00059         | 0.05363                             | 0.00062 | 0.39422                             | 0.00489 | 0.01708                              | 0.00024 |
| 336.1                               | 7.6 | 0.05317                              | 0.0006          | 0.05352                             | 0.00062 | 0.39249                             | 0.00492 | 0.01633                              | 0.00023 |
| 336.2                               | 7.6 | 0.05419                              | 0.00060         | 0.05354                             | 0.00062 | 0.40012                             | 0.00496 | 0.01594                              | 0.00023 |
| 336.3                               | 7.6 | 0.05435                              | 0.00061         | 0.05356                             | 0.00062 | 0.40147                             | 0.00502 | 0.01813                              | 0.00027 |
| 336.3                               | 7.6 | 0.05493                              | 0.00064         | 0.05356                             | 0.00062 | 0.40568                             | 0.00520 | 0.01830                              | 0.00028 |
| 337.5                               | 7.6 | 0.05449                              | 0.00063         | 0.05374                             | 0.00062 | 0.40386                             | 0.00511 | 0.01702                              | 0.00026 |
| 336.4                               | 7.6 | 0.05537                              | 0.00064         | 0.05357                             | 0.00062 | 0.40905                             | 0.00519 | 0.01831                              | 0.00028 |
| 337.4                               | 7.6 | 0.06037                              | 0.00070         | 0.05374                             | 0.00062 | 0.44739                             | 0.00565 | 0.02022                              | 0.00032 |
| 336.6                               | 7.4 | 0.05432                              | 0.00060         | 0.05360                             | 0.00061 | 0.40147                             | 0.00488 | 0.01660                              | 0.00020 |
| 336.8                               | 7.4 | 0.05348                              | 0.00058         | 0.05364                             | 0.00061 | 0.39560                             | 0.00471 | 0.01594                              | 0.00019 |
| 337.8                               | 7.5 | 0.06580                              | 0.00072         | 0.05379                             | 0.00061 | 0.48813                             | 0.00589 | 0.01850                              | 0.00023 |
| 337.9                               | 7.5 | 0.05529                              | 0.00064         | 0.05381                             | 0.00061 | 0.41023                             | 0.00518 | 0.01648                              | 0.00022 |
| 337.5                               | 7.5 | 0.05902                              | 0.00075         | 0.05375                             | 0.00062 | 0.43744                             | 0.00598 | 0.01429                              | 0.00021 |
| 336.2                               | 7.5 | 0.06028                              | 0.00067         | 0.05354                             | 0.00061 | 0.44507                             | 0.00547 | 0.01795                              | 0.00025 |
| 337.0                               | 7.5 | 0.05614                              | 0.00067         | 0.05366                             | 0.00061 | 0.41545                             | 0.00540 | 0.01699                              | 0.00025 |
| 337.2                               | 7.5 | 0.05999                              | 0.00074         | 0.05370                             | 0.00062 | 0.44424                             | 0.00593 | 0.01838                              | 0.00027 |
| 334.2                               | 7.4 | 0.05502                              | 0.00063         | 0.05321                             | 0.00061 | 0.40372                             | 0.00506 | 0.01406                              | 0.00021 |
| 337.5                               | 7.5 | 0.05808                              | 0.00067         | 0.05375                             | 0.00061 | 0.43050                             | 0.00543 | 0.01904                              | 0.00029 |
| 337.2                               | 7.5 | 0.05528                              | 0.00064         | 0.05371                             | 0.00061 | 0.40940                             | 0.00518 | 0.01715                              | 0.00027 |

|       |     |         |         |         |         |         |         |         |         |
|-------|-----|---------|---------|---------|---------|---------|---------|---------|---------|
| 338.0 | 7.6 | 0.05420 | 0.00064 | 0.05384 | 0.00062 | 0.40240 | 0.00519 | 0.01650 | 0.00027 |
| 335.8 | 7.5 | 0.05441 | 0.00064 | 0.05347 | 0.00061 | 0.40120 | 0.00514 | 0.01621 | 0.00027 |
| 336.1 | 7.5 | 0.05652 | 0.00067 | 0.05352 | 0.00061 | 0.41714 | 0.00540 | 0.01717 | 0.00029 |
| 352.2 | 8.0 | 0.0530  | 0.00059 | 0.05616 | 0.00065 | 0.41047 | 0.00512 | 0.01677 | 0.00024 |
| 350.7 | 7.8 | 0.05573 | 0.00064 | 0.05590 | 0.00064 | 0.42965 | 0.00542 | 0.01938 | 0.00031 |
| 377.7 | 8.3 | 0.05685 | 0.00064 | 0.06035 | 0.00069 | 0.47313 | 0.00584 | 0.01773 | 0.00024 |
| 379.3 | 8.4 | 0.05729 | 0.00065 | 0.06060 | 0.00069 | 0.47880 | 0.00595 | 0.01907 | 0.00026 |
| 338.2 | 7.6 | 0.05346 | 0.00062 | 0.05386 | 0.00062 | 0.39702 | 0.00505 | 0.01661 | 0.00022 |
| 340.4 | 7.7 | 0.05621 | 0.00078 | 0.05423 | 0.00063 | 0.42036 | 0.00619 | 0.01768 | 0.00025 |
| 339.3 | 7.6 | 0.05869 | 0.00083 | 0.05404 | 0.00062 | 0.43745 | 0.00648 | 0.01850 | 0.00027 |
| 349.5 | 7.6 | 0.08412 | 0.00093 | 0.05572 | 0.00062 | 0.64652 | 0.00768 | 0.02925 | 0.00039 |
| 340.2 | 7.3 | 0.05938 | 0.00074 | 0.05419 | 0.00059 | 0.44390 | 0.00576 | 0.01994 | 0.00029 |
| 340.0 | 7.2 | 0.05360 | 0.00067 | 0.05415 | 0.00059 | 0.40044 | 0.00521 | 0.01703 | 0.00025 |
| 341.6 | 7.2 | 0.10526 | 0.00119 | 0.05442 | 0.00059 | 0.79020 | 0.00930 | 0.03948 | 0.00057 |
| 340.1 | 7.5 | 0.07592 | 0.00131 | 0.05417 | 0.00061 | 0.56735 | 0.00974 | 0.02119 | 0.00034 |
| 337.5 | 6.6 | 0.05848 | 0.00064 | 0.05375 | 0.00054 | 0.43348 | 0.00472 | 0.01869 | 0.00024 |
| 335.0 | 6.6 | 0.05302 | 0.00062 | 0.05335 | 0.00054 | 0.39005 | 0.00454 | 0.01590 | 0.00022 |
| 337.5 | 6.6 | 0.05529 | 0.00065 | 0.05375 | 0.00054 | 0.40984 | 0.00471 | 0.01559 | 0.00022 |
| 335.8 | 6.6 | 0.05515 | 0.00075 | 0.05346 | 0.00054 | 0.40661 | 0.00541 | 0.01642 | 0.00026 |
| 341.7 | 6.6 | 0.05773 | 0.00065 | 0.05444 | 0.00054 | 0.43338 | 0.00480 | 0.01853 | 0.00026 |
| 334.9 | 6.5 | 0.05440 | 0.00068 | 0.05333 | 0.00053 | 0.40003 | 0.00485 | 0.01728 | 0.00026 |
| 333.2 | 6.7 | 0.05531 | 0.00097 | 0.05305 | 0.00054 | 0.40457 | 0.00691 | 0.01715 | 0.00032 |
| 337.4 | 9.3 | 0.05432 | 0.00060 | 0.05373 | 0.00076 | 0.40247 | 0.00585 | 0.01609 | 0.00022 |
| 336.3 | 9.1 | 0.05472 | 0.00059 | 0.05355 | 0.00075 | 0.40413 | 0.00573 | 0.01640 | 0.00022 |
| 336.6 | 9.1 | 0.05883 | 0.00063 | 0.05359 | 0.00074 | 0.43492 | 0.00614 | 0.01740 | 0.00024 |
| 336.0 | 8.8 | 0.05320 | 0.00059 | 0.05351 | 0.00072 | 0.39270 | 0.00548 | 0.01601 | 0.00022 |
| 336.2 | 8.7 | 0.05370 | 0.00059 | 0.05354 | 0.00071 | 0.39673 | 0.00543 | 0.01638 | 0.00023 |
| 335.0 | 8.6 | 0.05550 | 0.00063 | 0.05335 | 0.00070 | 0.40855 | 0.00567 | 0.01613 | 0.00023 |
| 336.3 | 8.4 | 0.05367 | 0.00062 | 0.05355 | 0.00069 | 0.39660 | 0.00544 | 0.01594 | 0.00023 |
| 337.4 | 8.2 | 0.05569 | 0.00065 | 0.05373 | 0.00067 | 0.41280 | 0.00555 | 0.01746 | 0.00027 |
| 336.0 | 8.1 | 0.06474 | 0.00080 | 0.05351 | 0.00067 | 0.47788 | 0.00669 | 0.01994 | 0.00031 |
| 339.9 | 7.0 | 0.06119 | 0.00071 | 0.05414 | 0.00057 | 0.45703 | 0.00544 | 0.01981 | 0.00030 |
| 338.4 | 7.0 | 0.05733 | 0.00068 | 0.05390 | 0.00057 | 0.42621 | 0.00516 | 0.01713 | 0.00026 |
| 329.7 | 6.8 | 0.05816 | 0.00086 | 0.05247 | 0.00055 | 0.42085 | 0.00611 | 0.01793 | 0.00031 |
| 338.8 | 6.8 | 0.05650 | 0.00071 | 0.05397 | 0.00056 | 0.42046 | 0.00524 | 0.01814 | 0.00030 |
| 338.3 | 6.3 | 0.05317 | 0.00060 | 0.05388 | 0.00052 | 0.39511 | 0.00424 | 0.01529 | 0.00018 |
| 339.2 | 6.4 | 0.06215 | 0.00075 | 0.05403 | 0.00052 | 0.46313 | 0.00534 | 0.01851 | 0.00023 |
| 339.1 | 6.3 | 0.05775 | 0.00068 | 0.05402 | 0.00052 | 0.43017 | 0.00484 | 0.01631 | 0.00020 |
| 335.4 | 6.2 | 0.06129 | 0.00078 | 0.05340 | 0.00051 | 0.45139 | 0.00540 | 0.01975 | 0.00030 |
| 339.7 | 6.4 | 0.05607 | 0.00088 | 0.05411 | 0.00053 | 0.41835 | 0.00627 | 0.01742 | 0.00029 |
| 347.0 | 8.6 | 0.05312 | 0.00058 | 0.05530 | 0.00070 | 0.40513 | 0.00541 | 0.01504 | 0.00018 |
| 345.2 | 8.5 | 0.05348 | 0.00062 | 0.05501 | 0.00070 | 0.40569 | 0.00558 | 0.01485 | 0.00018 |
| 344.9 | 8.5 | 0.05396 | 0.00061 | 0.05496 | 0.00069 | 0.40891 | 0.00554 | 0.01617 | 0.00019 |
| 345.5 | 8.5 | 0.05460 | 0.00065 | 0.05506 | 00.0007 | 0.41462 | 0.00582 | 0.01586 | 0.00019 |
| 344.2 | 8.4 | 0.05517 | 0.00065 | 0.05485 | 0.00069 | 0.41731 | 0.00578 | 0.01626 | 0.00020 |
| 344.2 | 8.4 | 0.05375 | 0.00062 | 0.05485 | 0.00069 | 0.40657 | 0.00556 | 0.01554 | 0.00019 |
| 345.8 | 8.3 | 0.05347 | 0.00062 | 0.05511 | 0.00068 | 0.40638 | 0.00551 | 0.01597 | 0.00020 |
| 345.4 | 8.3 | 0.05916 | 0.00072 | 0.05504 | 0.00068 | 0.44903 | 0.00620 | 0.01667 | 0.00022 |
| 343.1 | 8.2 | 0.05344 | 0.00061 | 0.05466 | 0.00067 | 0.40287 | 0.00533 | 0.01558 | 0.00021 |
| 345.1 | 8.2 | 0.05372 | 0.00061 | 0.05500 | 0.00067 | 0.40747 | 0.00535 | 0.01611 | 0.00022 |
| 345.5 | 8.2 | 0.05389 | 0.00070 | 0.05507 | 0.00067 | 0.40920 | 0.00590 | 0.01631 | 0.00023 |
| 344.7 | 8.1 | 0.05354 | 0.00063 | 0.05492 | 0.00066 | 0.40553 | 0.00542 | 0.01560 | 0.00022 |
| 345.5 | 8.1 | 0.05494 | 0.00064 | 0.05506 | 0.00066 | 0.41709 | 0.00549 | 0.01596 | 0.00024 |
| 347.0 | 8.1 | 0.05344 | 0.00062 | 0.05530 | 0.00066 | 0.40752 | 0.00532 | 0.01674 | 0.00025 |
| 341.7 | 7.7 | 0.05331 | 0.0006  | 0.05444 | 0.00063 | 0.40019 | 0.00505 | 0.01705 | 0.00022 |
| 341.1 | 7.7 | 0.05355 | 0.00059 | 0.05435 | 0.00063 | 0.40134 | 0.00495 | 0.01721 | 0.00022 |
| 344.1 | 7.8 | 0.05634 | 0.00077 | 0.05482 | 0.00064 | 0.42593 | 0.00620 | 0.01892 | 0.00026 |
| 343.7 | 7.7 | 0.05644 | 0.00062 | 0.05476 | 0.00063 | 0.42620 | 0.00525 | 0.01780 | 0.00023 |
| 347.2 | 7.8 | 0.0557  | 0.00064 | 0.05533 | 0.00064 | 0.42495 | 0.00538 | 0.01792 | 0.00024 |
| 342.6 | 7.7 | 0.05476 | 0.00062 | 0.05458 | 0.00063 | 0.41216 | 0.00516 | 0.01817 | 0.00024 |
| 343.7 | 7.7 | 0.0542  | 0.00063 | 0.05476 | 0.00063 | 0.40927 | 0.00524 | 0.01801 | 0.00025 |
| 344.9 | 7.7 | 0.05316 | 0.00061 | 0.05497 | 0.00063 | 0.40297 | 0.00509 | 0.01692 | 0.00023 |

|       |      |         |         |         |         |         |         |         |         |
|-------|------|---------|---------|---------|---------|---------|---------|---------|---------|
| 343.8 | 7.7  | 0.05411 | 0.00062 | 0.05477 | 0.00063 | 0.40869 | 0.00513 | 0.01755 | 0.00024 |
| 345.1 | 7.8  | 0.05395 | 0.00075 | 0.05500 | 0.00064 | 0.40915 | 0.00602 | 0.01746 | 0.00026 |
| 343.3 | 7.6  | 0.0542  | 0.00062 | 0.05469 | 0.00062 | 0.40878 | 0.00514 | 0.01649 | 0.00023 |
| 343.4 | 7.9  | 0.0585  | 0.00104 | 0.05472 | 0.00065 | 0.44142 | 0.00806 | 0.01753 | 0.00029 |
| 345.9 | 7.7  | 0.05546 | 0.00066 | 0.05513 | 0.00063 | 0.42158 | 0.00543 | 0.01851 | 0.00027 |
| 342.7 | 7.6  | 0.05556 | 0.00065 | 0.05460 | 0.00062 | 0.41829 | 0.00531 | 0.01698 | 0.00025 |
| 344.1 | 7.6  | 0.0576  | 0.00073 | 0.05484 | 0.00062 | 0.43559 | 0.00582 | 0.01791 | 0.00029 |
| 342.2 | 7.5  | 0.05379 | 0.00069 | 0.05451 | 0.00061 | 0.40440 | 0.00547 | 0.01728 | 0.00029 |
| 343.5 | 7.5  | 0.05449 | 0.00068 | 0.05473 | 0.00062 | 0.41128 | 0.00545 | 0.01732 | 0.00029 |
| 348.1 | 10.9 | 0.05565 | 0.00062 | 0.05549 | 0.00089 | 0.42584 | 0.00701 | 0.01730 | 0.00027 |
| 349.5 | 11.0 | 0.05482 | 0.00063 | 0.05571 | 0.00090 | 0.42117 | 0.00703 | 0.01663 | 0.00026 |
| 350.6 | 11.0 | 0.05358 | 0.00061 | 0.05589 | 0.00090 | 0.41297 | 0.00683 | 0.01675 | 0.00026 |
| 350.0 | 11.0 | 0.05486 | 0.00069 | 0.05580 | 0.00090 | 0.42218 | 0.00735 | 0.01603 | 0.00026 |
| 349.2 | 11.0 | 0.05315 | 0.00073 | 0.05566 | 0.00090 | 0.40802 | 0.00742 | 0.01555 | 0.00025 |
| 347.7 | 10.9 | 0.05355 | 0.00062 | 0.05541 | 0.00089 | 0.40920 | 0.00680 | 0.01581 | 0.00025 |
| 350.4 | 10.9 | 0.05515 | 0.00067 | 0.05586 | 0.00090 | 0.42484 | 0.00726 | 0.01742 | 0.00029 |
| 346.2 | 10.8 | 0.05536 | 0.0007  | 0.05517 | 0.00088 | 0.42119 | 0.00732 | 0.01691 | 0.00028 |
| 353.4 | 11.0 | 0.05443 | 0.00064 | 0.05635 | 0.00090 | 0.42299 | 0.00708 | 0.01703 | 0.00028 |
| 350.5 | 10.9 | 0.05595 | 0.00066 | 0.05588 | 0.00089 | 0.43122 | 0.00723 | 0.01722 | 0.00029 |
| 346.8 | 10.8 | 0.05368 | 0.00065 | 0.05527 | 0.00088 | 0.40917 | 0.00693 | 0.01627 | 0.00028 |
| 354.2 | 11.0 | 0.05635 | 0.00068 | 0.05649 | 0.00090 | 0.43897 | 0.00741 | 0.01734 | 0.00030 |
| 349.1 | 10.9 | 0.05368 | 0.00066 | 0.05564 | 0.00089 | 0.41195 | 0.00706 | 0.01543 | 0.00027 |
| 348.5 | 10.8 | 0.05585 | 0.00068 | 0.05554 | 0.00088 | 0.42784 | 0.00728 | 0.01774 | 0.00032 |
| 348.2 | 10.8 | 0.05625 | 0.0007  | 0.05550 | 0.00088 | 0.43053 | 0.00736 | 0.01707 | 0.00031 |
| 350.4 | 10.8 | 0.05595 | 0.00068 | 0.05586 | 0.00089 | 0.43103 | 0.00729 | 0.01721 | 0.00032 |
| 347.6 | 10.8 | 0.05359 | 0.00066 | 0.05539 | 0.00088 | 0.40939 | 0.00700 | 0.01631 | 0.00031 |
| 348.6 | 10.8 | 0.05361 | 0.00068 | 0.05557 | 0.00088 | 0.41079 | 0.00709 | 0.01573 | 0.00030 |
| 346.0 | 10.7 | 0.05538 | 0.00071 | 0.05513 | 0.00088 | 0.42108 | 0.00732 | 0.01733 | 0.00033 |
|       |      |         |         |         |         |         |         |         |         |
| 337.1 | 10.5 | 0.07714 | 0.00088 | 0.05368 | 0.00086 | 0.57105 | 0.00937 | 0.02900 | 0.00048 |
| 344.4 | 7.4  | 0.12043 | 0.00138 | 0.05487 | 0.00061 | 0.91128 | 0.01114 | 0.10056 | 0.00154 |
| 333.1 | 10.4 | 0.07096 | 0.00084 | 0.05303 | 0.00085 | 0.51894 | 0.00870 | 0.02489 | 0.00048 |
| 326.0 | 10.2 | 0.07507 | 0.00096 | 0.05187 | 0.00084 | 0.53703 | 0.00934 | 0.03809 | 0.00078 |
| 317.5 | 9.9  | 0.05415 | 0.00063 | 0.05049 | 0.00081 | 0.37700 | 0.00629 | 0.01674 | 0.00029 |
| 329.0 | 10.3 | 0.05759 | 0.00078 | 0.05236 | 0.00084 | 0.41578 | 0.00748 | 0.02422 | 0.00041 |
| 323.0 | 10.2 | 0.05548 | 0.00073 | 0.05139 | 0.00083 | 0.39312 | 0.00699 | 0.01792 | 0.00036 |
| 322.1 | 10.1 | 0.05368 | 0.00067 | 0.05124 | 0.00082 | 0.37926 | 0.00653 | 0.01537 | 0.00031 |
| 326.9 | 10.3 | 0.05845 | 0.00071 | 0.05202 | 0.00084 | 0.41930 | 0.00716 | 0.02102 | 0.00042 |
| 320.0 | 10.1 | 0.05399 | 0.00084 | 0.05089 | 0.00083 | 0.37885 | 0.00738 | 0.01656 | 0.00045 |
| 323.4 | 7.1  | 0.06588 | 0.0008  | 0.05144 | 0.00058 | 0.46734 | 0.00606 | 0.02061 | 0.00037 |
| 559.5 | 12.9 | 0.439   | 0.00614 | 0.09067 | 0.00109 | 5.48871 | 0.07892 | 0.30929 | 0.00626 |
| 357.6 | 11.1 | 0.06452 | 0.00071 | 0.05704 | 0.00091 | 0.50753 | 0.00822 | 0.02173 | 0.00035 |
| 355.7 | 11.1 | 0.06204 | 0.00078 | 0.05673 | 0.00091 | 0.48534 | 0.00834 | 0.01970 | 0.00038 |
| 350.4 | 10.9 | 0.05784 | 0.00064 | 0.05586 | 0.00089 | 0.44557 | 0.00728 | 0.02494 | 0.00038 |
| 360.5 | 11.2 | 0.06289 | 0.00075 | 0.05752 | 0.00092 | 0.49883 | 0.00839 | 0.02664 | 0.00042 |
| 344.4 | 10.8 | 0.05442 | 0.00068 | 0.05488 | 0.00088 | 0.41189 | 0.00715 | 0.01863 | 0.00037 |
| 345.9 | 10.8 | 0.05338 | 0.00061 | 0.05513 | 0.00088 | 0.40584 | 0.00674 | 0.01664 | 0.00030 |
| 365.5 | 11.4 | 0.06151 | 0.00078 | 0.05833 | 0.00094 | 0.49485 | 0.00865 | 0.03527 | 0.00075 |
| 355.3 | 7.7  | 0.06368 | 0.00075 | 0.05667 | 0.00063 | 0.49760 | 0.00629 | 0.02972 | 0.00049 |
| 414.9 | 12.8 | 0.0574  | 0.00065 | 0.06648 | 0.00106 | 0.52626 | 0.00864 | 0.02077 | 0.00036 |
| 417.5 | 13.0 | 0.05928 | 0.00076 | 0.06691 | 0.00107 | 0.54694 | 0.00952 | 0.02278 | 0.00042 |
| 394.7 | 12.3 | 0.0567  | 0.00071 | 0.06314 | 0.00102 | 0.49370 | 0.00849 | 0.02159 | 0.00046 |
| 451.9 | 14.0 | 0.05695 | 0.00069 | 0.07262 | 0.00117 | 0.57036 | 0.00971 | 0.02341 | 0.00037 |
| 425.4 | 13.2 | 0.05942 | 0.00076 | 0.06822 | 0.00110 | 0.55896 | 0.00978 | 0.02306 | 0.00036 |
| 423.5 | 13.4 | 0.06029 | 0.00104 | 0.06790 | 0.00111 | 0.56459 | 0.01173 | 0.02379 | 0.00042 |
| 428.8 | 13.4 | 0.05565 | 0.00077 | 0.06877 | 0.00111 | 0.52780 | 0.00961 | 0.01888 | 0.00032 |
| 436.1 | 13.5 | 0.05695 | 0.00064 | 0.07000 | 0.00112 | 0.54972 | 0.00904 | 0.02121 | 0.00034 |
| 459.0 | 14.2 | 0.05638 | 0.0007  | 0.07380 | 0.00119 | 0.57375 | 0.00991 | 0.01992 | 0.00032 |
| 466.1 | 14.5 | 0.05623 | 0.00072 | 0.07498 | 0.00121 | 0.58133 | 0.01017 | 0.02060 | 0.00039 |
| 451.1 | 14.0 | 0.05815 | 0.00072 | 0.07249 | 0.00117 | 0.58132 | 0.01004 | 0.02406 | 0.00044 |
| 457.6 | 14.3 | 0.05741 | 0.00082 | 0.07357 | 0.00119 | 0.58249 | 0.01079 | 0.02117 | 0.00042 |
| 445.8 | 13.9 | 0.05715 | 0.00074 | 0.07160 | 0.00115 | 0.56431 | 0.00994 | 0.02209 | 0.00048 |
| 396.9 | 12.5 | 0.05636 | 0.00081 | 0.06350 | 0.00103 | 0.49352 | 0.00920 | 0.02065 | 0.00042 |
| 397.7 | 12.5 | 0.05641 | 0.00086 | 0.06364 | 0.00103 | 0.49503 | 0.00952 | 0.01935 | 0.00042 |
| 378.5 | 11.8 | 0.06892 | 0.00081 | 0.06047 | 0.00097 | 0.57478 | 0.00964 | 0.02820 | 0.00045 |
| 350.5 | 7.5  | 0.0739  | 0.00085 | 0.05588 | 0.00062 | 0.56954 | 0.00698 | 0.02543 | 0.00037 |

|       |     |         |         |         |         |         |         |         |         |
|-------|-----|---------|---------|---------|---------|---------|---------|---------|---------|
| 407.6 | 8.9 | 0.07009 | 0.00084 | 0.06528 | 0.00073 | 0.63086 | 0.00811 | 0.03668 | 0.00062 |
|-------|-----|---------|---------|---------|---------|---------|---------|---------|---------|

---



**Tab. 2:** U–Th–Pb monazites analyses from sample G1-3 (W-CVG).

| Analysis_#  | Pb    | Th    | U     | Th/U | Age (Ma)                             |            | Pb <sup>206</sup> /U <sup>238</sup> | 2 $\sigma$ | Rho | Pb <sup>208</sup> /Th <sup>232</sup> |            | 2 $\sigma$ |
|-------------|-------|-------|-------|------|--------------------------------------|------------|-------------------------------------|------------|-----|--------------------------------------|------------|------------|
|             | (ppm) | (ppm) | (ppm) |      | Pb <sup>208</sup> /Th <sup>232</sup> | 2 $\sigma$ |                                     |            |     | Pb <sup>208</sup> /Th <sup>232</sup> | 2 $\sigma$ |            |
| <b>G1-3</b> |       |       |       |      |                                      |            |                                     |            |     |                                      |            |            |
| 05200411d   | 641   | 39291 | 1383  | 28.4 | 0.0161                               | 0.0005     | 0.0536                              | 0.0020     | 0.5 | 322.9                                | 9.8        |            |
| 07200411d   | 596   | 36715 | 1003  | 36.6 | 0.0165                               | 0.0005     | 0.0570                              | 0.0022     | 0.5 | 330.3                                | 10.1       |            |
| 08200411d   | 639   | 40289 | 1169  | 34.5 | 0.0161                               | 0.0005     | 0.0555                              | 0.0021     | 0.5 | 322.1                                | 9.9        |            |
| 09200411d   | 1234  | 71665 | 3502  | 20.5 | 0.0162                               | 0.0005     | 0.0543                              | 0.0021     | 0.5 | 325.1                                | 10.0       |            |
| 10200411d   | 1201  | 55089 | 8253  | 6.7  | 0.0161                               | 0.0005     | 0.0555                              | 0.0021     | 0.5 | 322.3                                | 10.0       |            |
| 11200411d   | 1299  | 70036 | 6000  | 11.7 | 0.0161                               | 0.0005     | 0.0520                              | 0.0020     | 0.5 | 323.5                                | 10.0       |            |
| 12200411d   | 1522  | 81380 | 7137  | 11.4 | 0.0161                               | 0.0005     | 0.0540                              | 0.0021     | 0.5 | 323.4                                | 10.1       |            |

**Tab. 3:** Representative whole-rock major-element analyses from CVMg–K, SVMg–K and CVG samples (wt. %).

|                                    | <b>EV 381N</b> | <b>EV 382O</b> | <b>EV 382N</b> | <b>EV 382M</b> | <b>EV 381M</b> | <b>EV 380M</b> |
|------------------------------------|----------------|----------------|----------------|----------------|----------------|----------------|
| Groups                             | CVMg_K         | CVMg_K         | CVMg_K         | CVMg_K         | CVMg_K         | CVMg_K         |
| Type                               | Basic rocks    |
| SiO <sub>2</sub>                   | 47.45          | 48.08          | 48.81          | 48.84          | 49.4           | 61.48          |
| TiO <sub>2</sub>                   | 1.39           | 1.46           | 1.45           | 1.52           | 1.38           | 0.89           |
| Al <sub>2</sub> O <sub>3</sub>     | 14.42          | 13.9           | 13.25          | 13.64          | 15.45          | 15.63          |
| FeOt                               | 8              | 7.95           | 7.95           | 8.07           | 6.99           | 4.74           |
| MnO                                | 0.14           | 0.13           | 0.14           | 0.13           | 0.11           | 0.06           |
| MgO                                | 8.59           | 9.16           | 9.84           | 9.27           | 7.47           | 3.59           |
| CaO                                | 6.33           | 6.38           | 5.44           | 5.46           | 5.42           | 2.1            |
| Na <sub>2</sub> O                  | 1.72           | 1.54           | 1.67           | 1.62           | 1.97           | 2.85           |
| K <sub>2</sub> O                   | 5.01           | 6.39           | 6.19           | 6.5            | 6.65           | 4.73           |
| P <sub>2</sub> O <sub>5</sub>      | 1.46           | 1.53           | 1.5            | 1.5            | 1.26           | 0.59           |
| LOI                                | 3.9            | 1.8            | 2.1            | 1.7            | 2.3            | 2.3            |
| Total                              | 98.41          | 98.32          | 98.34          | 98.25          | 98.4           | 98.96          |
| K <sub>2</sub> O/Na <sub>2</sub> O | 2.91           | 4.15           | 3.71           | 4.01           | 3.38           | 1.66           |
| A/CNK                              | 0.73           | 0.66           | 0.69           | 0.69           | 0.76           | 1.15           |
| mg                                 | 65.69          | 67.24          | 68.8           | 67.18          | 65.57          | 57.44          |

LOI: lost of Ignition; A/CNK=Al<sub>2</sub>O<sub>3</sub>/(CaO+Na<sub>2</sub>O+K<sub>2</sub>O); mg=Mg/(Mg+Fe)\*100 (molar percent)

|                                    | <b>CN1</b>  | <b>CN5</b>  | <b>CN7</b>  | <b>BR 14</b> | <b>CS-36A</b> | <b>CS-3B</b> |
|------------------------------------|-------------|-------------|-------------|--------------|---------------|--------------|
| Groups                             | CVMg_K      | CVMg_K      | CVMg_K      | CVMg_K       | CVMg_K        | CVMg_K       |
| Type                               | Dark facies | Dark facies | Dark facies | Light facies | Light facies  | Light facies |
| SiO <sub>2</sub>                   | 63.29       | 63.36       | 64.85       | 61.41        | 61.9          | 64.4         |
| TiO <sub>2</sub>                   | 0.77        | 0.75        | 0.73        | 0.94         | 0.7           | 0.79         |
| Al <sub>2</sub> O <sub>3</sub>     | 13.31       | 13.54       | 13.74       | 13.83        | 12.9          | 13.43        |
| FeOt                               | 3.91        | 3.82        | 3.4         | 4.44         | 3.81          | 4.09         |
| MnO                                | 0.06        | 0.07        | 0.06        | 0.08         | 0.07          | 0.07         |
| MgO                                | 4.23        | 4.56        | 3.82        | 4.46         | 4.82          | 4.66         |
| CaO                                | 2.64        | 2.21        | 1.29        | 2.99         | 2.45          | 2.75         |
| Na <sub>2</sub> O                  | 2.37        | 2.21        | 2.19        | 2.54         | 1.34          | 2.22         |
| K <sub>2</sub> O                   | 6.14        | 6.49        | 6.11        | 5.95         | 6.62          | 6.46         |
| P <sub>2</sub> O <sub>5</sub>      | 0.53        | 0.59        | 0.54        | 0.77         | 0.49          | 0.53         |
| LOI                                | 1.9         | 1.6         | 2.4         | 1.6          | 3.51          | 0.9          |
| Total                              | 99.15       | 99.2        | 99.13       | 99.01        | 98.61         | 100.3        |
| K <sub>2</sub> O/Na <sub>2</sub> O | 2.59        | 2.94        | 2.79        | 2.34         | 4.94          | 2.91         |
| A/CNK                              | 0.87        | 0.92        | 1.09        | 0.86         | 0.93          | 0.86         |
| mg                                 | 65.83       | 68.06       | 66.69       | 64.19        | 69.26         | 67.01        |

|                                    | <b>CS-20A</b> | <b>ME5</b>   | <b>CS-19B</b> | <b>BR 15</b> | <b>ME1</b>   | <b>CN3</b>   |
|------------------------------------|---------------|--------------|---------------|--------------|--------------|--------------|
| Groups                             | CVMg_K        | CVMg_K       | CVMg_K        | CVMg_K       | CVMg_K       | CVMg_K       |
| Type                               | Light facies  | Light facies | Light facies  | Light facies | Light facies | Light facies |
| SiO <sub>2</sub>                   | 65.8          | 65.85        | 66.2          | 66.62        | 66.93        | 67.3         |
| TiO <sub>2</sub>                   | 0.66          | 0.66         | 0.67          | 0.52         | 0.63         | 0.7          |
| Al <sub>2</sub> O <sub>3</sub>     | 12.88         | 14.06        | 13.55         | 14.76        | 14.08        | 13.11        |
| FeOt                               | 3.55          | 3.18         | 3.11          | 2.54         | 2.84         | 3.82         |
| MnO                                | 0.06          | 0.05         | 0.06          | 0.05         | 0.05         | 0.04         |
| MgO                                | 4.18          | 2.84         | 4.17          | 2.16         | 2.73         | 2.9          |
| CaO                                | 2.34          | 1.44         | 1.01          | 1.17         | 1.26         | 0.78         |
| Na <sub>2</sub> O                  | 2.29          | 2.79         | 2.08          | 3.47         | 2.61         | 2.21         |
| K <sub>2</sub> O                   | 6.24          | 5.76         | 6.45          | 5.68         | 6.43         | 6.41         |
| P <sub>2</sub> O <sub>5</sub>      | 0.49          | 0.54         | 0.41          | 0.37         | 0.48         | 0.53         |
| LOI                                | 1.17          | 2.2          | 2.02          | 2.1          | 1.3          | 1.5          |
| Total                              | 99.66         | 99.37        | 99.73         | 99.44        | 99.34        | 99.3         |
| K <sub>2</sub> O/Na <sub>2</sub> O | 2.72          | 2.06         | 3.1           | 1.64         | 2.46         | 2.9          |
| A/CNK                              | 0.87          | 1.05         | 1.11          | 1.06         | 1.04         | 1.09         |

|    |      |       |       |       |       |       |
|----|------|-------|-------|-------|-------|-------|
| mg | 67.7 | 61.45 | 70.51 | 60.28 | 63.12 | 57.48 |
|----|------|-------|-------|-------|-------|-------|

  

|                                    | <b>GO2</b>   | <b>GO3</b>   | <b>BAB4</b> | <b>BA11</b> | <b>BAB3</b> | <b>BAB5</b> |
|------------------------------------|--------------|--------------|-------------|-------------|-------------|-------------|
| Groups                             | CVMg_K       | CVMg_K       | SVMg_K      | SVMg_K      | SVMg_K      | SVMg_K      |
| Type                               | Light facies | Light facies | Basic rocks | Basic rocks | Basic rocks | Basic rocks |
| SiO <sub>2</sub>                   | 68.64        | 68.81        | 48.93       | 54.44       | 56.27       | 63.09       |
| TiO <sub>2</sub>                   | 0.43         | 0.46         | 0.68        | 0.83        | 0.95        | 0.54        |
| Al <sub>2</sub> O <sub>3</sub>     | 15.1         | 15.04        | 16.76       | 17.42       | 18.13       | 14.77       |
| FeOt                               | 2.3          | 2.26         | 7.23        | 6.05        | 6.35        | 4.38        |
| MnO                                | 0.05         | 0.04         | 0.16        | 0.13        | 0.1         | 0.1         |
| MgO                                | 1.68         | 1.45         | 7.44        | 3.39        | 2.78        | 2.85        |
| CaO                                | 1.22         | 1.18         | 10.07       | 5.42        | 2.52        | 3.11        |
| Na <sub>2</sub> O                  | 2.93         | 2.83         | 2.58        | 3.54        | 4.23        | 3.04        |
| K <sub>2</sub> O                   | 5.76         | 6.03         | 1.54        | 4.31        | 4.17        | 5.11        |
| P <sub>2</sub> O <sub>5</sub>      | 0.38         | 0.27         | 0.13        | 0.43        | 0.39        | 0.33        |
| LOI                                | 1            | 1.1          | 3.3         | 2.9         | 2.9         | 1.9         |
| Total                              | 99.49        | 99.47        | 98.82       | 98.86       | 98.79       | 99.22       |
| K <sub>2</sub> O/Na <sub>2</sub> O | 1.97         | 2.13         | 0.6         | 1.22        | 0.99        | 1.68        |
| A/CNK                              | 1.14         | 1.13         | 0.69        | 0.86        | 1.13        | 0.91        |
| mg                                 | 56.52        | 53.37        | 64.7        | 49.98       | 43.82       | 53.69       |

  

|                                    | <b>VOS5</b>    | <b>VOS8</b>    | <b>VOS3</b>    | <b>BA5</b>      | <b>BA13</b>     | <b>BA14</b>     |
|------------------------------------|----------------|----------------|----------------|-----------------|-----------------|-----------------|
| Groups                             | SVMg_K         | SVMg_K         | SVMg_K         | SVMg_K          | SVMg_K          | SVMg_K          |
| Type                               | Volcanic rocks | Volcanic rocks | Volcanic rocks | Porphy. granite | Porphy. granite | Porphy. granite |
| SiO <sub>2</sub>                   | 65.12          | 65.12          | 67.89          | 63.95           | 63.97           | 64.74           |
| TiO <sub>2</sub>                   | 0.41           | 0.43           | 0.37           | 0.5             | 0.4             | 0.47            |
| Al <sub>2</sub> O <sub>3</sub>     | 17.28          | 15.75          | 15.66          | 15.28           | 13.38           | 15.13           |
| FeOt                               | 3.03           | 3.46           | 2.66           | 3.78            | 2.72            | 3.56            |
| MnO                                | 0.08           | 0.07           | 0.05           | 0.07            | 0.07            | 0.05            |
| MgO                                | 0.64           | 1.87           | 0.48           | 2.74            | 1.91            | 2.16            |
| CaO                                | 0.35           | 1.61           | 0.33           | 1.71            | 4.39            | 1.59            |
| Na <sub>2</sub> O                  | 4.62           | 3.2            | 4.26           | 3.42            | 2.29            | 2.95            |
| K <sub>2</sub> O                   | 6.2            | 5.47           | 6.27           | 4.73            | 5.19            | 5.89            |
| P <sub>2</sub> O <sub>5</sub>      | 0.13           | 0.24           | 0.1            | 0.33            | 0.26            | 0.31            |
| LOI                                | 1.4            | 2.1            | 1.4            | 2.7             | 4.9             | 2.3             |
| Total                              | 99.26          | 99.32          | 99.47          | 99.21           | 99.48           | 99.15           |
| K <sub>2</sub> O/Na <sub>2</sub> O | 1.34           | 1.71           | 1.47           | 1.38            | 2.27            | 2               |
| A/CNK                              | 1.16           | 1.12           | 1.09           | 1.1             | 0.77            | 1.07            |
| mg                                 | 27.34          | 49.04          | 24.31          | 56.38           | 55.61           | 51.94           |

  

|                                    | <b>BA17</b>     | <b>BA6</b>      | <b>BA15</b>     | <b>BA9</b>      | <b>BA12</b>     | <b>BA16</b>     |
|------------------------------------|-----------------|-----------------|-----------------|-----------------|-----------------|-----------------|
| Groups                             | SVMg_K          | SVMg_K          | SVMg_K          | SVMg_K          | SVMg_K          | SVMg_K          |
| Type                               | Porphy. granite |
| SiO <sub>2</sub>                   | 65.75           | 65.88           | 67.39           | 67.46           | 68.15           | 68.76           |
| TiO <sub>2</sub>                   | 0.48            | 0.4             | 0.4             | 0.43            | 0.4             | 0.43            |
| Al <sub>2</sub> O <sub>3</sub>     | 14.34           | 14.2            | 14.23           | 14.81           | 14.89           | 13.45           |
| FeOt                               | 3.38            | 2.95            | 2.8             | 3.26            | 3.1             | 3.02            |
| MnO                                | 0.08            | 0.05            | 0.06            | 0.06            | 0.05            | 0.07            |
| MgO                                | 2.6             | 1.86            | 1.81            | 2.12            | 1.7             | 2               |
| CaO                                | 2.81            | 2.57            | 1.79            | 0.64            | 0.8             | 2.58            |
| Na <sub>2</sub> O                  | 3.06            | 2.73            | 3.02            | 3.32            | 2.98            | 3.08            |
| K <sub>2</sub> O                   | 5.24            | 5.34            | 5.32            | 5.16            | 5.43            | 4.84            |
| P <sub>2</sub> O <sub>5</sub>      | 0.3             | 0.26            | 0.25            | 0.28            | 0.25            | 0.25            |
| LOI                                | 1.3             | 3.2             | 2.4             | 1.9             | 1.7             | 1               |
| Total                              | 99.34           | 99.44           | 99.47           | 99.44           | 99.45           | 99.48           |
| K <sub>2</sub> O/Na <sub>2</sub> O | 1.71            | 1.96            | 1.76            | 1.55            | 1.82            | 1.57            |
| A/CNK                              | 0.91            | 0.95            | 1.02            | 1.21            | 1.22            | 0.9             |
| mg                                 | 57.8            | 52.91           | 53.55           | 53.71           | 49.47           | 54.11           |

|                                    | <b>TF5</b> | <b>OR 8</b> | <b>TF4</b> | <b>BR 1</b> | <b>PA2</b> | <b>LV8</b> |
|------------------------------------|------------|-------------|------------|-------------|------------|------------|
| Groups                             | E_CVG      | E_CVG       | E_CVG      | E_CVG       | E_CVG      | E_CVG      |
| Type                               | granite    | granite     | granite    | granite     | granite    | granite    |
| SiO <sub>2</sub>                   | 66.5       | 66.69       | 67.83      | 68.05       | 68.83      | 68.85      |
| TiO <sub>2</sub>                   | 0.5        | 0.51        | 0.53       | 0.44        | 0.39       | 0.42       |
| Al <sub>2</sub> O <sub>3</sub>     | 16.8       | 16.46       | 16.06      | 15.99       | 15.62      | 15.97      |
| FeOt                               | 2.31       | 2.5         | 2.3        | 2.09        | 2.13       | 1.83       |
| MnO                                | 0.03       | 0.04        | 0.04       | 0.04        | 0.04       | 0.03       |
| MgO                                | 1.18       | 1.4         | 1.14       | 1.34        | 1.06       | 0.92       |
| CaO                                | 1.37       | 1.42        | 1.49       | 0.82        | 1.5        | 1          |
| Na <sub>2</sub> O                  | 3.64       | 3.67        | 3.54       | 3.68        | 3.45       | 3.48       |
| K <sub>2</sub> O                   | 6          | 5.48        | 5.21       | 5.54        | 5.23       | 5.37       |
| P <sub>2</sub> O <sub>5</sub>      | 0.2        | 0.23        | 0.23       | 0.24        | 0.18       | 0.19       |
| LOI                                | 1          | 1.1         | 1.1        | 1.3         | 1.1        | 1.5        |
| Total                              | 99.53      | 99.5        | 99.47      | 99.53       | 99.53      | 99.56      |
| K <sub>2</sub> O/Na <sub>2</sub> O | 1.65       | 1.49        | 1.47       | 1.51        | 1.52       | 1.54       |
| A/CNK                              | 1.12       | 1.13        | 1.13       | 1.18        | 1.11       | 1.2        |
| mg                                 | 47.63      | 49.94       | 46.87      | 53.36       | 46.98      | 47.31      |

|                                    | <b>BR 8</b> | <b>OR 6</b> | <b>WI 10</b> | <b>TF10</b> | <b>LV2</b> | <b>PA3</b> |
|------------------------------------|-------------|-------------|--------------|-------------|------------|------------|
| Groups                             | E_CVG       | E_CVG       | E_CVG        | E_CVG       | E_CVG      | E_CVG      |
| Type                               | granite     | granite     | granite      | granite     | granite    | granite    |
| SiO <sub>2</sub>                   | 69.2        | 69.25       | 69.39        | 69.45       | 69.49      | 69.62      |
| TiO <sub>2</sub>                   | 0.36        | 0.38        | 0.28         | 0.39        | 0.36       | 0.33       |
| Al <sub>2</sub> O <sub>3</sub>     | 15.97       | 15.7        | 16.18        | 15.95       | 15.51      | 15.36      |
| FeOt                               | 2.08        | 1.91        | 1.61         | 1.84        | 1.87       | 1.88       |
| MnO                                | 0.04        | 0.03        | 0.03         | 0.03        | 0.04       | 0.02       |
| MgO                                | 1.4         | 1.07        | 0.66         | 0.89        | 0.77       | 0.92       |
| CaO                                | 0.97        | 0.97        | 1.18         | 0.67        | 0.76       | 0.41       |
| Na <sub>2</sub> O                  | 3.72        | 3.09        | 4.16         | 4.03        | 4.14       | 3.24       |
| K <sub>2</sub> O                   | 4.42        | 5.79        | 5.02         | 5.09        | 4.77       | 5.91       |
| P <sub>2</sub> O <sub>5</sub>      | 0.18        | 0.17        | 0.16         | 0.17        | 0.17       | 0.23       |
| LOI                                | 1.3         | 1.2         | 1            | 1.1         | 1.8        | 1.7        |
| Total                              | 99.64       | 99.56       | 99.67        | 99.61       | 99.68      | 99.62      |
| K <sub>2</sub> O/Na <sub>2</sub> O | 1.19        | 1.87        | 1.21         | 1.26        | 1.15       | 1.82       |
| A/CNK                              | 1.26        | 1.2         | 1.12         | 1.19        | 1.16       | 1.23       |
| mg                                 | 54.56       | 50          | 42.21        | 46.24       | 42.31      | 46.58      |

|                                    | <b>LV10</b> | <b>BR 5</b> | <b>GG10A</b> | <b>GG10C</b> | <b>OR 4</b> | <b>HO 2</b> |
|------------------------------------|-------------|-------------|--------------|--------------|-------------|-------------|
| Groups                             | E_CVG       | E_CVG       | W_CVG        | W_CVG        | W_CVG       | W_CVG       |
| Type                               | granite     | granite     | granite      | granite      | granite     | granite     |
| SiO <sub>2</sub>                   | 70.37       | 70.48       | 59.58        | 61.13        | 63.22       | 64.41       |
| TiO <sub>2</sub>                   | 0.36        | 0.35        | 0.75         | 0.47         | 0.63        | 0.64        |
| Al <sub>2</sub> O <sub>3</sub>     | 15.45       | 15.4        | 13.19        | 18.07        | 15.83       | 15.63       |
| FeOt                               | 1.8         | 1.75        | 4.29         | 2.2          | 3.57        | 2.88        |
| MnO                                | 0.04        | 0.03        | 0.07         | 0.02         | 0.06        | 0.05        |
| MgO                                | 0.88        | 0.93        | 5.5          | 1.82         | 3.19        | 2.33        |
| CaO                                | 1.22        | 0.66        | 3.27         | 1.19         | 1.37        | 1.3         |
| Na <sub>2</sub> O                  | 3.66        | 3.69        | 1.81         | 3.11         | 2.56        | 2.91        |
| K <sub>2</sub> O                   | 5.14        | 4.89        | 7.69         | 9.01         | 6.84        | 6.96        |
| P <sub>2</sub> O <sub>5</sub>      | 0.17        | 0.15        | 1.24         | 0.78         | 0.79        | 0.47        |
| LOI                                | 0.6         | 1.3         | 1.6          | 1.5          | 1.2         | 1.8         |
| Total                              | 99.69       | 99.63       | 98.99        | 99.3         | 99.26       | 99.38       |
| K <sub>2</sub> O/Na <sub>2</sub> O | 1.4         | 1.33        | 4.25         | 2.9          | 2.67        | 2.39        |
| A/CNK                              | 1.12        | 1.23        | 0.76         | 1.06         | 1.12        | 1.06        |
| mg                                 | 46.57       | 48.71       | 69.55        | 59.54        | 61.42       | 59.06       |

|                                    | <b>GG6</b> | <b>PA1</b> | <b>FU 4</b> | <b>FU 6</b> | <b>LV5</b> | <b>G1 5</b> |
|------------------------------------|------------|------------|-------------|-------------|------------|-------------|
| Groups                             | W_CVG      | W_CVG      | W_CVG       | W_CVG       | W_CVG      | W_CVG       |
| Type                               | granite    | granite    | granite     | granite     | granite    | granite     |
| SiO <sub>2</sub>                   | 68.27      | 68.45      | 68.69       | 69.14       | 69.16      | 69.43       |
| TiO <sub>2</sub>                   | 0.5        | 0.47       | 0.44        | 0.42        | 0.37       | 0.39        |
| Al <sub>2</sub> O <sub>3</sub>     | 15.42      | 14.56      | 16.19       | 16.25       | 15.58      | 15.61       |
| FeOt                               | 1.95       | 2.6        | 1.94        | 1.61        | 2.02       | 1.75        |
| MnO                                | 0.03       | 0.03       | 0.03        | 0.02        | 0.04       | 0.03        |
| MgO                                | 1.31       | 1.4        | 1           | 0.73        | 1.04       | 1.01        |
| CaO                                | 0.81       | 0.58       | 0.98        | 1.01        | 0.81       | 0.58        |
| Na <sub>2</sub> O                  | 3.19       | 2.48       | 3.62        | 3.63        | 3.45       | 3.36        |
| K <sub>2</sub> O                   | 6.52       | 6.51       | 5.2         | 5.21        | 5.48       | 6.2         |
| P <sub>2</sub> O <sub>5</sub>      | 0.35       | 0.32       | 0.21        | 0.22        | 0.2        | 0.29        |
| LOI                                | 1.2        | 2.1        | 1.3         | 1.4         | 1.5        | 1           |
| Total                              | 99.55      | 99.5       | 99.6        | 99.64       | 99.65      | 99.65       |
| K <sub>2</sub> O/Na <sub>2</sub> O | 2.04       | 2.62       | 1.44        | 1.44        | 1.59       | 1.85        |
| A/CNK                              | 1.12       | 1.2        | 1.21        | 1.21        | 1.19       | 1.17        |
| mg                                 | 54.46      | 48.97      | 47.84       | 44.69       | 47.8       | 50.77       |

|                                    | <b>PA5</b> | <b>HO 4</b> | <b>HO 3</b> | <b>RE 2</b> | <b>BR 11</b> | <b>RE 5</b> |
|------------------------------------|------------|-------------|-------------|-------------|--------------|-------------|
| Groups                             | W_CVG      | W_CVG       | W_CVG       | W_CVG       | W_CVG        | W_CVG       |
| Type                               | granite    | granite     | granite     | granite     | granite      | granite     |
| SiO <sub>2</sub>                   | 70.07      | 70.22       | 70.23       | 70.56       | 70.58        | 70.84       |
| TiO <sub>2</sub>                   | 0.43       | 0.29        | 0.17        | 0.23        | 0.31         | 0.32        |
| Al <sub>2</sub> O <sub>3</sub>     | 14.54      | 15.91       | 15.97       | 15.52       | 15.83        | 15.12       |
| FeOt                               | 2.63       | 1.53        | 1.3         | 1.26        | 1.5          | 1.41        |
| MnO                                | 0.04       | 0.02        | 0.04        | 0.02        | 0.03         | 0.01        |
| MgO                                | 0.8        | 0.55        | 0.33        | 0.51        | 0.66         | 0.25        |
| CaO                                | 0.98       | 0.8         | 0.48        | 0.9         | 0.76         | 0.29        |
| Na <sub>2</sub> O                  | 2.83       | 3.97        | 3.69        | 3.9         | 3.94         | 3.1         |
| K <sub>2</sub> O                   | 5.68       | 5.27        | 5.78        | 4.9         | 5.04         | 6.39        |
| P <sub>2</sub> O <sub>5</sub>      | 0.2        | 0.15        | 0.21        | 0.19        | 0.19         | 0.18        |
| LOI                                | 1.4        | 1           | 1.6         | 1.8         | 0.9          | 1.8         |
| Total                              | 99.6       | 99.71       | 99.8        | 99.79       | 99.74        | 99.71       |
| K <sub>2</sub> O/Na <sub>2</sub> O | 2.01       | 1.33        | 1.57        | 1.26        | 1.28         | 2.06        |
| A/CNK                              | 1.16       | 1.16        | 1.21        | 1.16        | 1.19         | 1.21        |
| mg                                 | 35.18      | 39.06       | 31.22       | 41.92       | 43.91        | 23.98       |

|                                    | <b>GG2</b> | <b>RE 11</b> | <b>L3</b> | <b>RE 4</b> | <b>GG4</b> | <b>GG5</b> |
|------------------------------------|------------|--------------|-----------|-------------|------------|------------|
| Groups                             | W_CVG      | W_CVG        | W_CVG     | W_CVG       | W_CVG      | W_CVG      |
| Type                               | granite    | granite      | granite   | granite     | granite    | granite    |
| SiO <sub>2</sub>                   | 71.67      | 71.69        | 72.36     | 72.39       | 72.47      | 72.52      |
| TiO <sub>2</sub>                   | 0.25       | 0.22         | 0.17      | 0.22        | 0.25       | 0.14       |
| Al <sub>2</sub> O <sub>3</sub>     | 15.34      | 15.74        | 14.45     | 15.14       | 14.41      | 15.33      |
| FeOt                               | 1.21       | 1.27         | 1.82      | 1.22        | 1.73       | 1          |
| MnO                                | 0.02       | 0.02         | 0.04      | 0.02        | 0.02       | 0.02       |
| MgO                                | 0.52       | 0.42         | 0.37      | 0.48        | 0.54       | 0.32       |
| CaO                                | 0.54       | 0.48         | 0.48      | 0.51        | 0.65       | 0.4        |
| Na <sub>2</sub> O                  | 3.4        | 3.67         | 2.93      | 3.7         | 3.34       | 3.49       |
| K <sub>2</sub> O                   | 5.6        | 4.98         | 5.87      | 4.94        | 5.11       | 5.18       |
| P <sub>2</sub> O <sub>5</sub>      | 0.23       | 0.17         | 0.15      | 0.16        | 0.19       | 0.17       |
| LOI                                | 1          | 1.1          | 1.1       | 1           | 1          | 1.2        |
| Total                              | 99.78      | 99.76        | 99.74     | 99.78       | 99.71      | 99.77      |
| K <sub>2</sub> O/Na <sub>2</sub> O | 1.65       | 1.36         | 2         | 1.34        | 1.53       | 1.48       |
| A/CNK                              | 1.21       | 1.28         | 1.2       | 1.22        | 1.18       | 1.27       |
| mg                                 | 43.46      | 37.11        | 26.63     | 41.15       | 35.78      | 36.35      |

| <b>EV 380N</b> | <b>CN2</b>  | <b>CN8</b>  | <b>CN6</b>  | <b>CS-12A</b> |
|----------------|-------------|-------------|-------------|---------------|
| CVMg_K         | CVMg_K      | CVMg_K      | CVMg_K      | CVMg_K        |
| Basic rocks    | Dark facies | Dark facies | Dark facies | Dark facies   |
| 63.19          | 58.29       | 60.99       | 62.24       | 62.9          |
| 0.81           | 0.96        | 0.78        | 0.81        | 0.76          |
| 15.07          | 13.51       | 13.28       | 13.37       | 13.49         |
| 4.27           | 5.15        | 3.79        | 4.27        | 3.74          |
| 0.05           | 0.09        | 0.08        | 0.07        | 0.06          |
| 3.07           | 6.13        | 3.8         | 4.88        | 4.31          |
| 1.55           | 3.33        | 3.18        | 2.47        | 2.32          |
| 2.74           | 2.14        | 2.01        | 2.19        | 2.07          |
| 5.47           | 6.58        | 6.72        | 6.63        | 6.34          |
| 0.53           | 0.89        | 0.58        | 0.67        | 0.48          |
| 2.3            | 1.9         | 4           | 1.5         | 2.12          |
| 99.05          | 98.97       | 99.21       | 99.1        | 98.59         |
| 2              | 3.07        | 3.34        | 3.03        | 3.06          |
| 1.14           | 0.81        | 0.81        | 0.88        | 0.93          |
| 56.2           | 67.98       | 64.13       | 67.05       | 67.27         |

| <b>CS-10B</b> | <b>CS-16A</b> | <b>CS-45A</b> | <b>BR 13</b> | <b>CS-21A</b> |
|---------------|---------------|---------------|--------------|---------------|
| CVMg_K        | CVMg_K        | CVMg_K        | CVMg_K       | CVMg_K        |
| Light facies  | Light facies  | Light facies  | Light facies | Light facies  |
| 64.7          | 65.2          | 65.2          | 65.4         | 65.6          |
| 0.68          | 0.7           | 0.72          | 0.7          | 0.76          |
| 13.33         | 13.27         | 13.56         | 14.57        | 13.2          |
| 3.52          | 3.57          | 3.8           | 3.39         | 3.87          |
| 0.06          | 0.06          | 0.07          | 0.05         | 0.07          |
| 4.01          | 4.36          | 4.29          | 2.55         | 4.63          |
| 2.6           | 2.03          | 2.58          | 0.89         | 2.69          |
| 2.37          | 2.54          | 2.18          | 1.95         | 2.12          |
| 6.18          | 5.87          | 6.43          | 7.74         | 6.1           |
| 0.52          | 0.49          | 0.55          | 0.5          | 0.65          |
| 0.71          | 1.84          | 0.9           | 1.5          | 0.89          |
| 98.68         | 99.93         | 100.28        | 99.24        | 100.58        |
| 2.61          | 2.31          | 2.95          | 3.97         | 2.88          |
| 0.87          | 0.93          | 0.89          | 1.1          | 0.88          |
| 67.04         | 68.54         | 66.84         | 57.26        | 68.07         |

| <b>ME3</b>   | <b>CN11</b>  | <b>GO4</b>   | <b>CN10</b>  | <b>GO1</b>   |
|--------------|--------------|--------------|--------------|--------------|
| CVMg_K       | CVMg_K       | CVMg_K       | CVMg_K       | CVMg_K       |
| Light facies |
| 67.37        | 67.44        | 67.81        | 67.84        | 68.22        |
| 0.59         | 0.65         | 0.57         | 0.63         | 0.58         |
| 13.94        | 13.7         | 14           | 14.12        | 14.4         |
| 2.93         | 3.13         | 2.83         | 2.49         | 2.82         |
| 0.06         | 0.05         | 0.05         | 0.05         | 0.05         |
| 2.64         | 2.27         | 2.37         | 2.15         | 2.23         |
| 1.72         | 0.45         | 0.93         | 0.67         | 0.76         |
| 2.79         | 2.27         | 2.8          | 2.46         | 2.7          |
| 6.07         | 6.51         | 5.62         | 6.38         | 5.45         |
| 0.47         | 0.34         | 0.45         | 0.37         | 0.44         |
| 0.8          | 2.5          | 2            | 2.2          | 1.8          |
| 99.38        | 99.31        | 99.43        | 99.36        | 99.45        |
| 2.18         | 2.87         | 2.01         | 2.59         | 2.02         |
| 0.98         | 1.18         | 1.13         | 1.16         | 1.23         |

|      |       |       |       |       |
|------|-------|-------|-------|-------|
| 61.6 | 56.37 | 59.85 | 60.59 | 58.53 |
|------|-------|-------|-------|-------|

  

| <b>VOS4</b>    | <b>VOS6</b>    | <b>VOS2</b>    | <b>VOS7</b>    | <b>VOS1</b>    |
|----------------|----------------|----------------|----------------|----------------|
| SVMg_K         | SVMg_K         | SVMg_K         | SVMg_K         | SVMg_K         |
| Volcanic rocks |
| 50.81          | 54.41          | 62.9           | 63.53          | 63.7           |
| 1.19           | 0.82           | 0.52           | 0.49           | 0.56           |
| 20.01          | 16.98          | 16.01          | 15.8           | 16.1           |
| 7.92           | 6.24           | 4.18           | 3.97           | 4.35           |
| 0.18           | 0.14           | 0.08           | 0.08           | 0.08           |
| 2.72           | 4.08           | 2.36           | 2.7            | 2.27           |
| 5.34           | 4.53           | 2.06           | 1.16           | 1.29           |
| 4.31           | 3.79           | 3.67           | 4.04           | 4.28           |
| 2.75           | 4.87           | 4.97           | 5.1            | 4.11           |
| 0.37           | 0.45           | 0.27           | 0.28           | 0.16           |
| 2.9            | 2.5            | 2.2            | 2.1            | 2.4            |
| 98.5           | 98.81          | 99.22          | 99.25          | 99.3           |
| 0.64           | 1.28           | 1.35           | 1.26           | 0.96           |
| 1.01           | 0.86           | 1.06           | 1.11           | 1.16           |
| 37.98          | 53.8           | 50.19          | 54.81          | 48.22          |

  

| <b>BA11</b>     | <b>BA7</b>      | <b>BA2</b>      | <b>BA1</b>      | <b>BA8</b>      |
|-----------------|-----------------|-----------------|-----------------|-----------------|
| SVMg_K          | SVMg_K          | SVMg_K          | SVMg_K          | SVMg_K          |
| Porphy. granite |
| 65.07           | 65.23           | 65.32           | 65.46           | 65.59           |
| 0.4             | 0.48            | 0.49            | 0.51            | 0.46            |
| 14              | 14.75           | 14.84           | 15.13           | 14.37           |
| 2.89            | 3.29            | 3.37            | 3.46            | 3.01            |
| 0.05            | 0.05            | 0.06            | 0.07            | 0.05            |
| 2.23            | 2.51            | 2.1             | 1.45            | 2.22            |
| 2.97            | 2.69            | 1.55            | 1.41            | 2.68            |
| 3.06            | 2.91            | 2.98            | 2.66            | 3.14            |
| 4.89            | 5.47            | 5.6             | 6.29            | 4.84            |
| 0.26            | 0.3             | 0.31            | 0.33            | 0.3             |
| 3.6             | 1.6             | 2.7             | 2.5             | 2.7             |
| 99.42           | 99.28           | 99.32           | 99.27           | 99.36           |
| 1.6             | 1.88            | 1.88            | 2.36            | 1.54            |
| 0.89            | 0.95            | 1.08            | 1.1             | 0.94            |
| 57.92           | 57.6            | 52.59           | 42.79           | 56.84           |

  

| <b>BA10</b>     | <b>CO4</b> | <b>CO2A</b> | <b>CO1</b> | <b>CO3</b> |
|-----------------|------------|-------------|------------|------------|
| SVMg_K          | SVMg_K     | SVMg_K      | SVMg_K     | SVMg_K     |
| Porphy. granite | FG granite | FG granite  | FG granite | FG granite |
| 69.17           | 65.53      | 66.06       | 66.7       | 66.99      |
| 0.41            | 0.69       | 0.52        | 0.48       | 0.71       |
| 14.26           | 14.64      | 15.37       | 15.56      | 13.74      |
| 2.95            | 3.46       | 3.51        | 3.18       | 3.33       |
| 0.06            | 0.06       | 0.07        | 0.05       | 0.09       |
| 1.33            | 2.98       | 2.25        | 1.94       | 2.11       |
| 0.94            | 0.84       | 0.8         | 1.31       | 1          |
| 2.53            | 2.85       | 3.2         | 3.49       | 2.43       |
| 5.84            | 5.67       | 5.15        | 4.41       | 6.72       |
| 0.27            | 0.51       | 0.22        | 0.2        | 0.63       |
| 1.7             | 2.1        | 2.2         | 2.1        | 1.6        |
| 99.46           | 99.33      | 99.35       | 99.42      | 99.35      |
| 2.31            | 1.99       | 1.61        | 1.26       | 2.77       |
| 1.17            | 1.19       | 1.25        | 1.21       | 1.05       |
| 44.55           | 60.59      | 53.33       | 52.12      | 53.05      |

| <b>WI 4</b> | <b>TF1</b> | <b>BR 12</b> | <b>TF9</b> | <b>HO 5</b> |
|-------------|------------|--------------|------------|-------------|
| E_CVG       | E_CVG      | E_CVG        | E_CVG      | E_CVG       |
| granite     | granite    | granite      | granite    | granite     |
| 68.85       | 68.99      | 69.05        | 69.09      | 69.15       |
| 0.41        | 0.39       | 0.43         | 0.41       | 0.39        |
| 16.28       | 15.82      | 15.98        | 15.53      | 16.08       |
| 1.8         | 1.96       | 2.06         | 2.17       | 1.91        |
| 0.03        | 0.04       | 0.04         | 0.04       | 0.02        |
| 0.97        | 1.13       | 0.95         | 1.15       | 0.87        |
| 0.76        | 0.98       | 0.61         | 1.27       | 0.56        |
| 3.35        | 3.63       | 3.98         | 3.73       | 3.14        |
| 5.51        | 5.28       | 5.01         | 5.11       | 5.74        |
| 0.19        | 0.22       | 0.2          | 0.19       | 0.19        |
| 1.5         | 1.1        | 1.3          | 0.9        | 1.6         |
| 99.65       | 99.54      | 99.61        | 99.59      | 99.65       |
| 1.64        | 1.45       | 1.26         | 1.37       | 1.83        |
| 1.27        | 1.17       | 1.22         | 1.11       | 1.3         |
| 49          | 50.66      | 45.11        | 48.59      | 44.84       |

| <b>GG3</b> | <b>BR 4</b> | <b>LV3</b> | <b>TF7</b> | <b>BR 10</b> |
|------------|-------------|------------|------------|--------------|
| E_CVG      | E_CVG       | E_CVG      | E_CVG      | E_CVG        |
| granite    | granite     | granite    | granite    | granite      |
| 69.64      | 69.9        | 70         | 70.25      | 70.26        |
| 0.31       | 0.39        | 0.37       | 0.37       | 0.27         |
| 15.57      | 15.6        | 15.69      | 15.2       | 15.72        |
| 1.38       | 1.87        | 1.68       | 1.83       | 1.51         |
| 0.03       | 0.03        | 0.04       | 0.04       | 0.04         |
| 0.88       | 0.98        | 0.85       | 1.09       | 0.73         |
| 0.74       | 1.15        | 0.98       | 1.07       | 1.1          |
| 3.28       | 3.8         | 3.79       | 3.9        | 4.09         |
| 6.71       | 4.86        | 4.99       | 4.95       | 4.82         |
| 0.22       | 0.19        | 0.18       | 0.17       | 0.17         |
| 0.9        | 0.9         | 1.1        | 0.8        | 1            |
| 99.66      | 99.67       | 99.67      | 99.67      | 99.71        |
| 2.05       | 1.28        | 1.32       | 1.27       | 1.18         |
| 1.11       | 1.15        | 1.17       | 1.11       | 1.13         |
| 53.26      | 48.28       | 47.38      | 51.54      | 46.26        |

| <b>WI 5</b> | <b>HO 7</b> | <b>GG9</b> | <b>LV7</b> | <b>G1 3</b> |
|-------------|-------------|------------|------------|-------------|
| W_CVG       | W_CVG       | W_CVG      | W_CVG      | W_CVG       |
| granite     | granite     | granite    | granite    | granite     |
| 65.73       | 66.34       | 66.39      | 67.54      | 68.05       |
| 0.6         | 0.59        | 0.68       | 0.44       | 0.37        |
| 15.49       | 15.9        | 15.01      | 16.58      | 16.3        |
| 2.74        | 2.83        | 2.8        | 2.19       | 1.77        |
| 0.06        | 0.06        | 0.04       | 0.04       | 0.03        |
| 2.06        | 1.99        | 2.1        | 1.17       | 1.03        |
| 0.69        | 0.74        | 1.05       | 0.94       | 0.7         |
| 3.61        | 3.05        | 2.26       | 3.83       | 3.41        |
| 5.77        | 6.07        | 7.23       | 5.16       | 6.68        |
| 0.37        | 0.37        | 0.49       | 0.27       | 0.27        |
| 2.4         | 1.5         | 1.3        | 1.4        | 1           |
| 99.52       | 99.44       | 99.35      | 99.56      | 99.61       |
| 1.6         | 1.99        | 3.2        | 1.35       | 1.96        |
| 1.15        | 1.23        | 1.12       | 1.22       | 1.15        |
| 57.31       | 55.66       | 57.22      | 48.82      | 50.88       |



| <b>FU 1</b> | <b>G1 2</b> | <b>PA4</b> | <b>G1 6</b> | <b>RE 12</b> |
|-------------|-------------|------------|-------------|--------------|
| W_CVG       | W_CVG       | W_CVG      | W_CVG       | W_CVG        |
| granite     | granite     | granite    | granite     | granite      |
| 69.58       | 69.66       | 69.73      | 69.88       | 69.93        |
| 0.37        | 0.33        | 0.43       | 0.3         | 0.27         |
| 16.34       | 15.46       | 14.85      | 15.37       | 16.19        |
| 1.61        | 1.83        | 2.73       | 1.57        | 1.38         |
| 0.02        | 0.02        | 0.03       | 0.03        | 0.02         |
| 0.77        | 0.85        | 0.81       | 0.9         | 0.64         |
| 0.79        | 0.41        | 0.39       | 0.48        | 0.49         |
| 3.61        | 3.11        | 2.98       | 3.03        | 3.82         |
| 5.01        | 6.37        | 5.34       | 6.61        | 5.53         |
| 0.18        | 0.26        | 0.19       | 0.26        | 0.2          |
| 1.4         | 1.3         | 2.1        | 1.2         | 1.3          |
| 99.68       | 99.6        | 99.58      | 99.63       | 99.77        |
| 1.39        | 2.05        | 1.79       | 2.18        | 1.45         |
| 1.28        | 1.21        | 1.3        | 1.18        | 1.23         |
| 46.01       | 45.34       | 34.62      | 50.61       | 45.32        |

| <b>GG8</b> | <b>G1 7</b> | <b>RE 6</b> | <b>RE 9</b> | <b>RE 7</b> |
|------------|-------------|-------------|-------------|-------------|
| W_CVG      | W_CVG       | W_CVG       | W_CVG       | W_CVG       |
| granite    | granite     | granite     | granite     | granite     |
| 70.87      | 71.25       | 71.39       | 71.39       | 71.52       |
| 0.15       | 0.32        | 0.18        | 0.22        | 0.22        |
| 16.2       | 14.83       | 15.34       | 15.71       | 15.68       |
| 1.05       | 1.59        | 1.17        | 1.36        | 1.12        |
| 0.02       | 0.03        | 0.02        | 0.02        | 0.02        |
| 0.35       | 0.78        | 0.39        | 0.49        | 0.41        |
| 0.85       | 0.52        | 0.31        | 0.56        | 0.32        |
| 3.87       | 3.09        | 2.89        | 3.8         | 3.14        |
| 5.52       | 6.12        | 6.41        | 4.96        | 5.52        |
| 0.19       | 0.24        | 0.16        | 0.17        | 0.16        |
| 0.7        | 0.9         | 1.5         | 1.1         | 1.7         |
| 99.77      | 99.67       | 99.76       | 99.78       | 99.81       |
| 1.43       | 1.98        | 2.22        | 1.31        | 1.76        |
| 1.17       | 1.17        | 1.25        | 1.24        | 1.34        |
| 37.21      | 46.61       | 37.28       | 39.13       | 39.58       |

| <b>WI 1</b> | <b>RE 8</b> | <b>L6</b> | <b>GG1</b> | <b>L4</b> |
|-------------|-------------|-----------|------------|-----------|
| W_CVG       | W_CVG       | W_CVG     | W_CVG      | W_CVG     |
| granite     | granite     | granite   | granite    | granite   |
| 72.62       | 72.83       | 73.13     | 73.35      | 73.58     |
| 0.27        | 0.17        | 0.15      | 0.11       | 0.15      |
| 14.39       | 15.02       | 14.11     | 14.65      | 14.26     |
| 1.37        | 1.17        | 1.5       | 0.74       | 1.21      |
| 0.01        | 0.02        | 0.02      | 0.02       | 0.02      |
| 0.47        | 0.4         | 0.39      | 0.27       | 0.28      |
| 0.28        | 0.55        | 0.17      | 0.63       | 0.39      |
| 3.44        | 3.62        | 3.03      | 3.35       | 3.18      |
| 5.33        | 4.91        | 5.55      | 5.47       | 5.08      |
| 0.18        | 0.19        | 0.1       | 0.18       | 0.31      |
| 1.4         | 0.9         | 1.6       | 1.2        | 1.4       |
| 99.76       | 99.78       | 99.75     | 99.97      | 99.86     |
| 1.55        | 1.36        | 1.83      | 1.63       | 1.6       |
| 1.21        | 1.22        | 1.25      | 1.16       | 1.25      |
| 37.99       | 37.87       | 31.63     | 39.48      | 29.28     |

**Tab. 4:** Representative whole-rock trace-element analyses from CVMg–K, SVMg–K and CVG samples (ppm).

|                                  | EV 381N     | EV 382O     | EV 382N     | EV 382M     | EV 381M     | EV 380M     |
|----------------------------------|-------------|-------------|-------------|-------------|-------------|-------------|
| Groups                           | CVMg_K      | CVMg_K      | CVMg_K      | CVMg_K      | CVMg_K      | CVMg_K      |
| Type                             | Basic rocks |
| Rb                               | 196.1       | 299.9       | 294.5       | 279.1       | 330.1       | 137.3       |
| Cs                               | 3.9         | 11.6        | 9.4         | 9.4         | 10.6        | 4.3         |
| Ba                               | 2268        | 2878        | 2673        | 2897        | 3033        | 1676        |
| Sr                               | 529.5       | 529.9       | 488.2       | 524.8       | 764.6       | 418.7       |
| Th                               | 5.7         | 5.7         | 6.2         | 3.7         | 5.9         | 64.2        |
| U                                | 6.4         | 6.8         | 6.5         | 4.5         | 5.7         | 6           |
| Zr                               | 490.5       | 446.2       | 503.8       | 468.9       | 506.2       | 465.5       |
| Hf                               | 14.5        | 12.8        | 14.3        | 13.3        | 14.3        | 13.9        |
| Nb                               | 30.3        | 28.4        | 26.7        | 27.6        | 32          | 21.1        |
| Ta                               | 1.3         | 1.3         | 1           | 1.1         | 1.2         | 1           |
| Ga                               | 21          | 22.3        | 20          | 21.6        | 20.1        | 20.5        |
| Sc                               | 28          | 31          | 29          | 28          | 26          | 14          |
| Cr                               | 554.2       | 533.68      | 622.62      | 581.57      | 403.68      | 157.37      |
| Ni                               | 73.8        | 61.1        | 110.1       | 93.8        | 66.7        | 38.5        |
| Co                               | 30.8        | 31.6        | 34.1        | 33.5        | 28.2        | 14.6        |
| V                                | 156         | 176         | 169         | 171         | 153         | 79          |
| Pb                               | 2.8         | 6.3         | 71.8        | 8.5         | 4.8         | 5.6         |
| Zn                               | 74          | 80          | 88          | 87          | 75          | 63          |
| Cu                               | 5.6         | 27.6        | 37          | 38.2        | 28.7        | 27          |
| Sn                               | 1           | 1           | 1           | NA          | NA          | 1           |
| W                                | 0.9         | 0.6         | NA          | NA          | NA          | NA          |
| Be                               | 2           | NA          | 2           | NA          | 2           | 2           |
| Bi                               | NA          | NA          | NA          | NA          | NA          | NA          |
| As                               | 1.8         | 1.4         | 9.3         | 0.9         | 1.2         | 8.4         |
| Mo                               | NA          | 0.1         | 0.6         | 0.2         | NA          | NA          |
| Sb                               | NA          | NA          | NA          | NA          | NA          | NA          |
| Y                                | 33.4        | 34.5        | 36.9        | 34.1        | 30.1        | 42.9        |
| La                               | 51.1        | 51.3        | 56.6        | 48          | 46.6        | 90          |
| Ce                               | 132         | 136.4       | 140.7       | 124.3       | 118.3       | 198.4       |
| Pr                               | 17.42       | 18.16       | 18.66       | 17.24       | 15.64       | 22.45       |
| Nd                               | 78.6        | 79.9        | 86.2        | 78.3        | 70.8        | 86.6        |
| Sm                               | 17.21       | 18.44       | 18.89       | 16.99       | 15.03       | 16.45       |
| Eu                               | 3.16        | 2.8         | 2.85        | 2.78        | 3.06        | 2.1         |
| Gd                               | 10.57       | 12.11       | 11.54       | 11.56       | 9.51        | 11.23       |
| Tb                               | 1.37        | 1.52        | 1.5         | 1.49        | 1.25        | 1.69        |
| Dy                               | 6.64        | 7.3         | 6.82        | 7.08        | 5.79        | 8.63        |
| Ho                               | 1.14        | 1.21        | 1.19        | 1.23        | 1.09        | 1.55        |
| Er                               | 3.08        | 3.16        | 3.18        | 3.3         | 2.71        | 3.85        |
| Tm                               | 0.42        | 0.44        | 0.44        | 0.45        | 0.4         | 0.49        |
| Yb                               | 2.41        | 2.66        | 2.71        | 2.57        | 2.35        | 2.67        |
| Lu                               | 0.35        | 0.38        | 0.39        | 0.38        | 0.34        | 0.39        |
| ΣREE                             | 325.47      | 335.78      | 351.67      | 315.67      | 292.87      | 446.5       |
| La <sub>N</sub> /Yb <sub>N</sub> | 14.3        | 13          | 14.08       | 12.59       | 13.37       | 22.73       |
| Eu/Eu*                           | 0.72        | 0.57        | 0.59        | 0.61        | 0.78        | 0.47        |
| Rb/Sr                            | 0.37        | 0.57        | 0.6         | 0.53        | 0.43        | 0.33        |
| Rb/Ba                            | 0.09        | 0.1         | 0.11        | 0.1         | 0.11        | 0.08        |

NA: not analyzed

|        | CN1         | CN5         | CN7         | BR 14        | CS-36A       | CS-3B        |
|--------|-------------|-------------|-------------|--------------|--------------|--------------|
| Groups | CVMg_K      | CVMg_K      | CVMg_K      | CVMg_K       | CVMg_K       | CVMg_K       |
| Type   | Dark facies | Dark facies | Dark facies | Light facies | Light facies | Light facies |
| Rb     | 326.4       | 436         | 341.1       | 299.6        | 355          | 360          |
| Cs     | 11.8        | 52.6        | 16.6        | 21.1         | 11           | 28           |
| Ba     | 1306        | 1334        | 1805        | 1850         | 1142         | 1420         |
| Sr     | 347.1       | 357.6       | 352.7       | 413          | 195          | 310          |

|                                  |        |        |        |        |        |       |
|----------------------------------|--------|--------|--------|--------|--------|-------|
| Th                               | 63.7   | 54.8   | 46.3   | 47.8   | 39.39  | 44.13 |
| U                                | 20.2   | 15.4   | 12.8   | 13.8   | 15.99  | 19.43 |
| Zr                               | 358.8  | 368.8  | 332.4  | 351.3  | 274.2  | 358.8 |
| Hf                               | 10.8   | 10.8   | 9.6    | 10.3   | 8.04   | 10.26 |
| Nb                               | 26.5   | 24.1   | 21.9   | 22.6   | 23.61  | 24.3  |
| Ta                               | 2.9    | 1.8    | 1.9    | 1.7    | 2.25   | 2.3   |
| Ga                               | 20.2   | 20.3   | 19.7   | 18.4   | NA     | NA    |
| Sc                               | 13     | 13     | 11     | 14     | NA     | NA    |
| Cr                               | 239.47 | 266.84 | 253.15 | 191.58 | 300    | 280   |
| Ni                               | 45.5   | 53.8   | 53.6   | 33.8   | 75     | 95    |
| Co                               | 14.6   | 15.5   | 16.3   | 15.7   | 13.73  | 15.03 |
| V                                | 79     | 83     | 75     | 78     | 74     | 79    |
| Pb                               | 10.5   | 8.5    | 8.2    | 33     | 248    | 35.27 |
| Zn                               | 35     | 63     | 45     | 59     | 180    | 80    |
| Cu                               | 9.3    | 24.8   | 14.2   | 18.2   | 20     | NA    |
| Sn                               | 21     | 20     | 16     | 6      | NA     | NA    |
| W                                | 4.1    | 5.4    | 8.6    | 1.2    | 8.4    | 4.9   |
| Be                               | 10     | 7      | 8      | 5      | NA     | NA    |
| Bi                               | 0.4    | 0.1    | 0.4    | 0.1    | NA     | NA    |
| As                               | 17.8   | 6.1    | 12.8   | 3.7    | 20.9   | 19    |
| Mo                               | 0.4    | 0.3    | 0.4    | NA     | 0.6    | NA    |
| Sb                               | 0.2    | 0.3    | 0.2    | 0.3    | 0.6    | 0.11  |
| Y                                | 26.1   | 25.4   | 22.1   | 26.1   | 25     | 24    |
| La                               | 67.9   | 50.9   | 47.2   | 31.8   | 40.81  | 47.19 |
| Ce                               | 155.7  | 122    | 112.3  | 88.4   | 94.99  | 104   |
| Pr                               | 17.11  | 13.88  | 12.55  | 12.34  | 12.68  | 13.71 |
| Nd                               | 70.4   | 57     | 52.6   | 61.1   | 52.74  | 56.48 |
| Sm                               | 13.21  | 11.62  | 10.17  | 13.86  | 11.22  | 11.98 |
| Eu                               | 1.83   | 1.67   | 1.8    | 2.15   | 1.53   | 1.95  |
| Gd                               | 7.58   | 7.08   | 6.34   | 9.08   | 6.7    | 7.1   |
| Tb                               | 0.97   | 0.91   | 0.83   | 1.16   | 0.8    | 0.9   |
| Dy                               | 4.79   | 4.54   | 3.88   | 5.77   | 4.47   | 4.64  |
| Ho                               | 0.82   | 0.78   | 0.68   | 0.96   | 0.74   | 0.82  |
| Er                               | 2.26   | 2.09   | 1.96   | 2.6    | 2.13   | 2.26  |
| Tm                               | 0.35   | 0.34   | 0.28   | 0.38   | 0.24   | 0.32  |
| Yb                               | 2.31   | 2.08   | 1.83   | 2.19   | 2.07   | 2.07  |
| Lu                               | 0.33   | 0.32   | 0.28   | 0.31   | 0.22   | 0.28  |
| ΣREE                             | 345.56 | 275.21 | 252.7  | 232.1  | 231.34 | 253.7 |
| La <sub>N</sub> /Yb <sub>N</sub> | 19.82  | 16.5   | 17.39  | 9.79   | 13.29  | 15.37 |
| Eu/Eu*                           | 0.56   | 0.56   | 0.69   | 0.59   | 0.54   | 0.65  |
| Rb/Sr                            | 0.94   | 1.22   | 0.97   | 0.73   | 1.82   | 1.16  |
| Rb/Ba                            | 0.25   | 0.33   | 0.19   | 0.16   | 0.31   | 0.25  |

|        | <b>CS-20A</b> | <b>ME5</b>   | <b>CS-19B</b> | <b>BR 15</b> | <b>ME1</b>   | <b>CN3</b>   |
|--------|---------------|--------------|---------------|--------------|--------------|--------------|
| Groups | CVMg_K        | CVMg_K       | CVMg_K        | CVMg_K       | CVMg_K       | CVMg_K       |
| Type   | Light facies  | Light facies | Light facies  | Light facies | Light facies | Light facies |
| Rb     | 384           | 323.8        | 401           | 314.6        | 359.8        | 367.8        |
| Cs     | 33            | 26.9         | 24            | 23.6         | 28           | 86.1         |
| Ba     | 1249          | 1323         | 1247          | 1026         | 1361         | 1084         |
| Sr     | 273           | 304.5        | 265           | 260.3        | 326.4        | 255.2        |
| Th     | 45.96         | 44.9         | 49.54         | 42.2         | 42.6         | 58.3         |
| U      | 10.65         | 11.9         | 13.86         | 11.8         | 11.2         | 7.1          |
| Zr     | 294.1         | 254.4        | 347.2         | 232.5        | 274          | 313.5        |
| Hf     | 8.64          | 8.1          | 10.23         | 8.3          | 8.9          | 9.3          |
| Nb     | 24.27         | 16.4         | 23.76         | 17.1         | 18.3         | 21.6         |
| Ta     | 2.56          | 1.5          | 2.04          | 1.8          | 1.9          | 1.7          |
| Ga     | NA            | 19.1         | NA            | 20           | 19.3         | 18.6         |
| Sc     | NA            | 10           | NA            | 8            | 9            | 12           |
| Cr     | 240           | 171.05       | 260           | 95.79        | 164.21       | 218.94       |

|                                  |        |        |       |        |        |        |
|----------------------------------|--------|--------|-------|--------|--------|--------|
| Ni                               | 99     | 27.5   | 95    | 19.2   | 40.6   | 55.7   |
| Co                               | 13.45  | 9.9    | 11.94 | 7.8    | 9.6    | 16.8   |
| V                                | 67     | 61     | 66    | 45     | 53     | 72     |
| Pb                               | 45.67  | 18.8   | 38.16 | 2.1    | 5.1    | 8.2    |
| Zn                               | 90     | 73     | 130   | 51     | 56     | 69     |
| Cu                               | 20     | 11.1   | 20    | 9.5    | 25.3   | 18.4   |
| Sn                               | NA     | 9      | NA    | 7      | 10     | 11     |
| W                                | 2.4    | 1.6    | 1.4   | 14.8   | 1.8    | 17.5   |
| Be                               | NA     | 7      | NA    | 8      | 7      | 4      |
| Bi                               | NA     | 0.1    | NA    | 3.3    | 0.3    | 0.6    |
| As                               | 4.6    | 8      | 4.8   | 17.1   | 5.7    | 20.4   |
| Mo                               | NA     | 0.5    | NA    | NA     | 0.3    | 0.6    |
| Sb                               | 0.18   | 0.6    | 0.22  | 0.2    | 0.4    | 1.2    |
| Y                                | 23     | 20     | 27    | 20.6   | 22.4   | 19.9   |
| La                               | 53.36  | 39.5   | 51.44 | 26.4   | 40.9   | 45.7   |
| Ce                               | 113    | 96.5   | 106   | 67.8   | 98.9   | 116.7  |
| Pr                               | 14.39  | 11.76  | 14.23 | 9.02   | 12.16  | 12.46  |
| Nd                               | 57.59  | 52.2   | 57.4  | 41.7   | 51.2   | 50.6   |
| Sm                               | 11.87  | 10.17  | 12.2  | 8.68   | 10.27  | 9.58   |
| Eu                               | 1.7    | 1.59   | 1.79  | 1.38   | 1.67   | 1.5    |
| Gd                               | 6.9    | 5.93   | 7.4   | 5.52   | 6.19   | 5.81   |
| Tb                               | 0.8    | 0.77   | 0.9   | 0.73   | 0.8    | 0.78   |
| Dy                               | 4.3    | 3.7    | 4.85  | 3.71   | 4.14   | 3.81   |
| Ho                               | 0.71   | 0.65   | 0.83  | 0.71   | 0.73   | 0.68   |
| Er                               | 2.04   | 1.79   | 2.31  | 1.85   | 2.11   | 1.85   |
| Tm                               | 0.25   | 0.29   | 0.28  | 0.3    | 0.31   | 0.3    |
| Yb                               | 1.89   | 1.71   | 2.13  | 1.96   | 1.97   | 1.93   |
| Lu                               | 0.21   | 0.27   | 0.24  | 0.29   | 0.29   | 0.28   |
| ΣREE                             | 269.01 | 226.83 | 262   | 170.05 | 231.64 | 251.98 |
| La <sub>N</sub> /Yb <sub>N</sub> | 19.03  | 15.57  | 16.28 | 9.08   | 14     | 15.96  |
| Eu/Eu*                           | 0.57   | 0.63   | 0.58  | 0.61   | 0.64   | 0.61   |
| Rb/Sr                            | 1.41   | 1.06   | 1.51  | 1.21   | 1.1    | 1.44   |
| Rb/Ba                            | 0.31   | 0.24   | 0.32  | 0.31   | 0.26   | 0.34   |

|        | GO2          | GO3          | BAB4        | BA11        | BAB3        | BAB5        |
|--------|--------------|--------------|-------------|-------------|-------------|-------------|
| Groups | CVMg_K       | CVMg_K       | SVMg_K      | SVMg_K      | SVMg_K      | SVMg_K      |
| Type   | Light facies | Light facies | Basic rocks | Basic rocks | Basic rocks | Basic rocks |
| Rb     | 317.8        | 346.3        | 96          | 216         | 184.8       | 287.1       |
| Cs     | 27.1         | 30.1         | 24.5        | 20.8        | 29.2        | 23.2        |
| Ba     | 1100         | 1092         | 521         | 2191        | 2221        | 1283        |
| Sr     | 286.2        | 297.6        | 497.5       | 710         | 464.8       | 374.3       |
| Th     | 28.7         | 32.6         | 10.9        | 51.3        | 24.8        | 54.2        |
| U      | 7.7          | 6.3          | 3.1         | 13.9        | 7.8         | 13.8        |
| Zr     | 206.3        | 210.6        | 104.3       | 304.1       | 406.4       | 175.2       |
| Hf     | 6.4          | 6.6          | 3           | 8.2         | 9.4         | 5.9         |
| Nb     | 13.6         | 12.5         | 3.3         | 15          | 10.6        | 12.4        |
| Ta     | 1.4          | 1.3          | 0.2         | 1.1         | 0.6         | 1.4         |
| Ga     | 20.2         | 20.1         | 14          | 16.9        | 17.1        | 14.2        |
| Sc     | 7            | 6            | 45          | 17          | 12          | 12          |
| Cr     | 75.26        | 75.26        | 123.16      | 54.74       | 13.68       | 136.84      |
| Ni     | 16.6         | 13           | 17          | 13.8        | 3.1         | 19.6        |
| Co     | 7.1          | 5.9          | 32.3        | 20.3        | 15.6        | 14.1        |
| V      | 40           | 40           | 197         | 156         | 151         | 108         |
| Pb     | 8.7          | 2.9          | 5.2         | 39.5        | 15.7        | 19          |
| Zn     | 54           | 33           | 26          | 45          | 106         | 33          |
| Cu     | 9.7          | 2.7          | 16.1        | 51.3        | 29.7        | 14          |
| Sn     | 10           | 6            | 3           | 4           | 3           | 4           |
| W      | 2.3          | 0.7          | 1.8         | 6.8         | 1.9         | 4.3         |
| Be     | 5            | 6            | 1           | 4           | 3           | 5           |

|                                  |        |        |        |        |        |        |
|----------------------------------|--------|--------|--------|--------|--------|--------|
| Bi                               | 0.3    | NA     | 0.3    | 0.3    | 0.2    | 0.2    |
| As                               | 8.3    | 2.6    | 12     | 44.6   | 10     | 16.1   |
| Mo                               | 0.5    | 0.3    | 0.3    | 1.1    | 0.4    | 0.5    |
| Sb                               | 0.2    | NA     | NA     | 0.4    | 0.2    | 0.5    |
| Y                                | 19.3   | 16.1   | 23.4   | 26.8   | 28.9   | 17.3   |
| La                               | 32.8   | 38     | 16.5   | 49.3   | 46.4   | 38.1   |
| Ce                               | 76.9   | 90.2   | 40.6   | 102.9  | 96.3   | 77.1   |
| Pr                               | 9.04   | 9.95   | 5.16   | 11.56  | 11.19  | 8.29   |
| Nd                               | 36.7   | 38.9   | 22.3   | 43.6   | 43.4   | 31     |
| Sm                               | 6.91   | 6.86   | 4.78   | 7.46   | 7.64   | 5.21   |
| Eu                               | 1.3    | 1.2    | 1.23   | 1.51   | 1.97   | 1.03   |
| Gd                               | 4.73   | 4.5    | 4.66   | 6.04   | 6.45   | 3.96   |
| Tb                               | 0.7    | 0.63   | 0.77   | 0.92   | 1.01   | 0.55   |
| Dy                               | 3.46   | 3.01   | 4.18   | 4.66   | 5.36   | 2.84   |
| Ho                               | 0.66   | 0.54   | 0.87   | 0.91   | 1.07   | 0.56   |
| Er                               | 1.83   | 1.45   | 2.28   | 2.49   | 2.99   | 1.54   |
| Tm                               | 0.27   | 0.23   | 0.36   | 0.39   | 0.45   | 0.24   |
| Yb                               | 1.71   | 1.41   | 2.1    | 2.42   | 3.01   | 1.57   |
| Lu                               | 0.27   | 0.21   | 0.36   | 0.39   | 0.48   | 0.25   |
| ΣREE                             | 177.28 | 197.09 | 106.15 | 234.55 | 227.72 | 172.24 |
| La <sub>N</sub> /Yb <sub>N</sub> | 12.93  | 18.17  | 5.3    | 13.73  | 10.39  | 16.36  |
| Eu/Eu*                           | 0.7    | 0.66   | 0.8    | 0.69   | 0.86   | 0.69   |
| Rb/Sr                            | 1.11   | 1.16   | 0.19   | 0.3    | 0.4    | 0.77   |
| Rb/Ba                            | 0.29   | 0.32   | 0.18   | 0.1    | 0.08   | 0.22   |

|        | VOS5           | VOS8           | VOS3           | BA5             | BA13            | BA14            |
|--------|----------------|----------------|----------------|-----------------|-----------------|-----------------|
| Groups | SVMg_K         | SVMg_K         | SVMg_K         | SVMg_K          | SVMg_K          | SVMg_K          |
| Type   | Volcanic rocks | Volcanic rocks | Volcanic rocks | Porphy. granite | Porphy. granite | Porphy. granite |
| Rb     | 265.9          | 292.9          | 283.4          | 295.2           | 352.8           | 414.3           |
| Cs     | 8.1            | 23.3           | 5.4            | 12.1            | 13.5            | 19.8            |
| Ba     | 2357           | 1518           | 1355           | 1457            | 1182            | 1399            |
| Sr     | 183.7          | 479.3          | 153.5          | 476.2           | 350.9           | 422.4           |
| Th     | 79.4           | 38.5           | 97             | 58.9            | 55.8            | 55.7            |
| U      | 20.2           | 14.4           | 27.4           | 16              | 6.2             | 19              |
| Zr     | 436.3          | 180.1          | 444.1          | 177.1           | 186.7           | 184.2           |
| Hf     | 11.6           | 5.3            | 12.4           | 5.8             | 5.8             | 5.6             |
| Nb     | 21.6           | 11.5           | 24.2           | 15.6            | 13.2            | 15.3            |
| Ta     | 1.6            | 1.2            | 1.8            | 1.9             | 1.7             | 1.9             |
| Ga     | 15.5           | 17.3           | 15.1           | 16.9            | 14.8            | 17              |
| Sc     | 7              | 10             | 7              | 11              | 8               | 10              |
| Cr     | NA             | 61.58          | NA             | 109.47          | 82.1            | 88.95           |
| Ni     | 0.6            | 12.4           | 1              | 25.9            | 19.5            | 27              |
| Co     | 2.6            | 8.3            | 2.8            | 13.9            | 10.2            | 11.5            |
| V      | 21             | 69             | 17             | 85              | 66              | 86              |
| Pb     | 21.2           | 19.7           | 11.2           | 8.5             | 5.5             | 13.4            |
| Zn     | 44             | 101            | 42             | 55              | 33              | 32              |
| Cu     | 2.3            | 2.5            | 3.2            | 4.3             | 0.5             | 969.7           |
| Sn     | 4              | 5              | 7              | 6               | 5               | 7               |
| W      | 2.8            | 3.5            | 5.7            | 2.3             | 7.6             | 34.1            |
| Be     | 4              | 4              | 4              | 5               | 4               | 5               |
| Bi     | NA             | 0.2            | 0.7            | 0.3             | NA              | 2.3             |
| As     | 6              | 19.1           | 6.5            | 6.4             | 3               | 19              |
| Mo     | 0.4            | 0.3            | 0.5            | 0.4             | 0.3             | 14.3            |
| Sb     | 0.7            | 0.5            | 1.2            | 0.2             | NA              | 0.7             |
| Y      | 30.3           | 18.4           | 34.7           | 17.9            | 14.7            | 15.6            |
| La     | 50.9           | 38.6           | 66.4           | 38.1            | 35.1            | 35              |
| Ce     | 140.4          | 78.7           | 145.8          | 80.5            | 67.1            | 70.8            |
| Pr     | 11.31          | 8.34           | 14.29          | 8.64            | 7.29            | 7.81            |
| Nd     | 40.5           | 30.6           | 52.4           | 31.8            | 26.5            | 28.7            |

|                                  |        |        |        |        |        |        |
|----------------------------------|--------|--------|--------|--------|--------|--------|
| Sm                               | 7.04   | 5.14   | 8.45   | 5.82   | 4.63   | 5.25   |
| Eu                               | 1.35   | 1.07   | 1.14   | 1.02   | 0.93   | 1      |
| Gd                               | 5.39   | 3.69   | 6.62   | 4.23   | 3.3    | 3.62   |
| Tb                               | 0.89   | 0.57   | 1.06   | 0.62   | 0.47   | 0.54   |
| Dy                               | 4.95   | 3.12   | 5.73   | 3.2    | 2.33   | 2.63   |
| Ho                               | 1.04   | 0.59   | 1.16   | 0.6    | 0.48   | 0.52   |
| Er                               | 3.12   | 1.72   | 3.6    | 1.64   | 1.26   | 1.39   |
| Tm                               | 0.52   | 0.26   | 0.58   | 0.27   | 0.2    | 0.23   |
| Yb                               | 3.33   | 1.86   | 3.64   | 1.7    | 1.3    | 1.48   |
| Lu                               | 0.55   | 0.28   | 0.61   | 0.27   | 0.23   | 0.24   |
| ΣREE                             | 271.29 | 174.54 | 311.48 | 178.41 | 151.12 | 159.21 |
| La <sub>N</sub> /Yb <sub>N</sub> | 10.31  | 13.99  | 12.3   | 15.11  | 18.2   | 15.94  |
| Eu/Eu*                           | 0.67   | 0.75   | 0.47   | 0.63   | 0.73   | 0.7    |
| Rb/Sr                            | 1.45   | 0.61   | 1.85   | 0.62   | 1.01   | 0.98   |
| Rb/Ba                            | 0.11   | 0.19   | 0.21   | 0.2    | 0.3    | 0.3    |

|        | BA17            | BA6             | BA15            | BA9             | BA12            | BA16            |
|--------|-----------------|-----------------|-----------------|-----------------|-----------------|-----------------|
| Groups | SVMg_K          | SVMg_K          | SVMg_K          | SVMg_K          | SVMg_K          | SVMg_K          |
| Type   | Porphy. granite |
| Rb     | 348.7           | 354.1           | 353.1           | 361.2           | 371.4           | 360.7           |
| Cs     | 19.8            | 15.2            | 16.9            | 14.2            | 19.3            | 13.1            |
| Ba     | 1193            | 1127            | 1224            | 1024            | 1101            | 845             |
| Sr     | 402.2           | 360.3           | 358.2           | 348.1           | 369.6           | 335.5           |
| Th     | 62.5            | 52.4            | 50.1            | 56.6            | 56.2            | 57.2            |
| U      | 18.5            | 16.5            | 22.2            | 13.8            | 20.7            | 27.9            |
| Zr     | 208.5           | 173.3           | 172.6           | 181.8           | 155             | 163.2           |
| Hf     | 6.9             | 5.8             | 5.8             | 5.9             | 5               | 5.8             |
| Nb     | 16.5            | 13              | 12.5            | 15.4            | 13.6            | 15.8            |
| Ta     | 2.1             | 1.7             | 1.6             | 1.9             | 1.7             | 2.3             |
| Ga     | 15.5            | 15.4            | 15.4            | 16.2            | 17              | 15.6            |
| Sc     | 10              | 8               | 8               | 9               | 9               | 8               |
| Cr     | 95.79           | 61.58           | 82.1            | 88.95           | 68.42           | 61.58           |
| Ni     | 13.2            | 17.9            | 18.3            | 20.7            | 18.9            | 11.2            |
| Co     | 11.9            | 9.4             | 8.8             | 10.8            | 9.5             | 9.8             |
| V      | 81              | 68              | 61              | 77              | 73              | 66              |
| Pb     | 17.9            | 6.5             | 10.2            | 7.5             | 35.5            | 7               |
| Zn     | 69              | 33              | 54              | 39              | 44              | 31              |
| Cu     | 2.8             | 5.2             | 2.1             | 0.9             | 8.2             | 2.6             |
| Sn     | 5               | 6               | 5               | 5               | 11              | 9               |
| W      | 20.9            | 21.5            | 8               | 6.9             | 8.9             | 28.6            |
| Be     | 7               | 5               | 5               | 6               | 6               | 6               |
| Bi     | NA              | 0.4             | 0.1             | 0.1             | 8.8             | 0.1             |
| As     | 40.4            | 3.3             | 8               | 9.6             | 9.8             | 4.2             |
| Mo     | 1.2             | 3.1             | 0.5             | 0.4             | 0.8             | 1.5             |
| Sb     | 0.2             | 0.2             | 0.2             | 0.2             | 0.2             | NA              |
| Y      | 17.3            | 13.4            | 14              | 12.8            | 11.4            | 14.8            |
| La     | 36.4            | 32.2            | 28              | 30.1            | 31.7            | 32.6            |
| Ce     | 75.9            | 65              | 61.2            | 65.5            | 67.9            | 67.9            |
| Pr     | 8.27            | 6.86            | 6.44            | 6.45            | 6.17            | 7.11            |
| Nd     | 30.7            | 24.9            | 23.8            | 22.9            | 21.7            | 26.6            |
| Sm     | 5.58            | 4.38            | 4.34            | 4.09            | 3.88            | 4.71            |
| Eu     | 1.02            | 0.83            | 0.81            | 0.76            | 0.77            | 0.81            |
| Gd     | 4.02            | 3.12            | 3.09            | 2.9             | 2.76            | 3.45            |
| Tb     | 0.58            | 0.46            | 0.47            | 0.43            | 0.41            | 0.49            |
| Dy     | 2.94            | 2.3             | 2.44            | 2.27            | 2.17            | 2.55            |
| Ho     | 0.6             | 0.45            | 0.46            | 0.46            | 0.41            | 0.48            |
| Er     | 1.62            | 1.28            | 1.28            | 1.29            | 1.17            | 1.39            |
| Tm     | 0.26            | 0.21            | 0.22            | 0.21            | 0.19            | 0.22            |
| Yb     | 1.76            | 1.38            | 1.38            | 1.43            | 1.27            | 1.51            |

|                                  |        |        |        |        |        |        |
|----------------------------------|--------|--------|--------|--------|--------|--------|
| Lu                               | 0.28   | 0.22   | 0.22   | 0.24   | 0.21   | 0.25   |
| ΣREE                             | 169.93 | 143.59 | 134.15 | 139.03 | 140.71 | 150.07 |
| La <sub>N</sub> /Yb <sub>N</sub> | 13.94  | 15.73  | 13.68  | 14.19  | 16.83  | 14.56  |
| Eu/Eu*                           | 0.66   | 0.69   | 0.68   | 0.67   | 0.72   | 0.61   |
| Rb/Sr                            | 0.87   | 0.98   | 0.99   | 1.04   | 1      | 1.08   |
| Rb/Ba                            | 0.29   | 0.31   | 0.29   | 0.35   | 0.34   | 0.43   |

|                                  | TF5     | OR 8    | TF4     | BR 1    | PA2     | LV8     |
|----------------------------------|---------|---------|---------|---------|---------|---------|
| Groups                           | E_CVG   | E_CVG   | E_CVG   | E_CVG   | E_CVG   | E_CVG   |
| Type                             | granite | granite | granite | granite | granite | granite |
| Rb                               | 225.4   | 224.4   | 267.1   | 275.6   | 256.8   | 269.8   |
| Cs                               | 31.4    | 19.9    | 23.8    | 16.2    | 20.5    | 30.7    |
| Ba                               | 1184    | 1228    | 1089    | 969     | 1050    | 938     |
| Sr                               | 341.2   | 333.8   | 277.7   | 244.1   | 399.4   | 249.2   |
| Th                               | 26.2    | 29.7    | 32.3    | 27.4    | 32.1    | 27.6    |
| U                                | 4.6     | 5.9     | 5.7     | 3.9     | 9.1     | 5.8     |
| Zr                               | 182.4   | 214.3   | 218.9   | 196.2   | 232     | 167.6   |
| Hf                               | 6       | 7       | 6.5     | 6.6     | 7.6     | 5.2     |
| Nb                               | 10.7    | 10.3    | 13.2    | 14      | 14.5    | 11.3    |
| Ta                               | 0.8     | 0.9     | 1.4     | 1.7     | 1.5     | 1.3     |
| Ga                               | 20.7    | 20.3    | 23.5    | 22.7    | 20.8    | 21.2    |
| Sc                               | 6       | 7       | 6       | 6       | 5       | 5       |
| Cr                               | 27.37   | 27.37   | 27.37   | 27.37   | NA      | 20.53   |
| Ni                               | 6.5     | 6.3     | 6.8     | 11.2    | 7       | 4.2     |
| Co                               | 4.2     | 4.6     | 4.6     | 4.7     | 4.9     | 3.6     |
| V                                | 39      | 45      | 48      | 31      | 37      | 39      |
| Pb                               | 3.6     | 5.4     | 4.1     | 2.2     | 10.3    | 3.5     |
| Zn                               | 46      | 57      | 52      | 46      | 56      | 38      |
| Cu                               | 2.1     | 6.2     | 0.7     | 2.4     | 10.2    | 1.1     |
| Sn                               | 6       | 7       | 7       | 11      | 5       | 8       |
| W                                | 0.8     | 0.9     | 0.7     | 0.7     | 1.1     | 1       |
| Be                               | 6       | 5       | 7       | 10      | 4       | 6       |
| Bi                               | 0.3     | NA      | 0.6     | 0.3     | 0.2     | 0.2     |
| As                               | 5.9     | 10      | 8.3     | 1.5     | 2.5     | 2.8     |
| Mo                               | NA      | 0.2     | NA      | NA      | 0.5     | NA      |
| Sb                               | NA      | NA      | 0.1     | 0.1     | NA      | 0.2     |
| Y                                | 12.9    | 12.5    | 21.3    | 16.4    | 13.6    | 13.6    |
| La                               | 34      | 41.4    | 43      | 45      | 48.4    | 35      |
| Ce                               | 76.2    | 84.5    | 95.3    | 90.4    | 106.4   | 71.2    |
| Pr                               | 8.24    | 9.48    | 10.22   | 10.99   | 10.59   | 7.97    |
| Nd                               | 31.1    | 32.8    | 35.2    | 41.6    | 37.7    | 27.2    |
| Sm                               | 5.85    | 5.96    | 7.1     | 7.36    | 6.05    | 5.12    |
| Eu                               | 1.13    | 1.16    | 1.17    | 1.23    | 0.97    | 0.92    |
| Gd                               | 3.91    | 4.01    | 5.47    | 4.85    | 4.06    | 3.81    |
| Tb                               | 0.53    | 0.54    | 0.76    | 0.64    | 0.56    | 0.56    |
| Dy                               | 2.37    | 2.29    | 3.91    | 3.36    | 2.63    | 2.79    |
| Ho                               | 0.44    | 0.42    | 0.69    | 0.55    | 0.44    | 0.53    |
| Er                               | 1.25    | 1.16    | 1.94    | 1.53    | 1.19    | 1.48    |
| Tm                               | 0.18    | 0.17    | 0.32    | 0.22    | 0.17    | 0.22    |
| Yb                               | 1.06    | 0.96    | 1.45    | 1.51    | 0.98    | 1.21    |
| Lu                               | 0.16    | 0.15    | 0.24    | 0.22    | 0.15    | 0.19    |
| ΣREE                             | 166.42  | 185     | 206.77  | 209.46  | 220.29  | 158.2   |
| La <sub>N</sub> /Yb <sub>N</sub> | 21.63   | 29.07   | 19.99   | 20.09   | 33.3    | 19.5    |
| Eu/Eu*                           | 0.72    | 0.73    | 0.57    | 0.63    | 0.6     | 0.64    |
| Rb/Sr                            | 0.66    | 0.67    | 0.96    | 1.13    | 0.64    | 1.08    |
| Rb/Ba                            | 0.19    | 0.18    | 0.25    | 0.28    | 0.24    | 0.29    |

|        | BR 8  | OR 6  | WI 10 | TF10  | LV2   | PA3   |
|--------|-------|-------|-------|-------|-------|-------|
| Groups | E_CVG | E_CVG | E_CVG | E_CVG | E_CVG | E_CVG |

| Type                             | granite | granite | granite | granite | granite | granite |
|----------------------------------|---------|---------|---------|---------|---------|---------|
| Rb                               | 179.2   | 234.8   | 253.4   | 257.1   | 230.4   | 305.9   |
| Cs                               | 24.9    | 31.9    | 15.3    | 26.3    | 13.5    | 41.9    |
| Ba                               | 682     | 1389    | 723     | 799     | 656     | 818     |
| Sr                               | 247.6   | 387.2   | 250.8   | 230.2   | 184.7   | 240.7   |
| Th                               | 13.4    | 8.1     | 21.5    | 26.5    | 21.8    | 24.1    |
| U                                | 4.9     | 3       | 4.5     | 4.3     | 4       | 3.5     |
| Zr                               | 111.9   | 113.7   | 121.6   | 169     | 136.8   | 174.8   |
| Hf                               | 3.7     | 3.4     | 4.3     | 5.2     | 4.4     | 5.6     |
| Nb                               | 8.5     | 7.2     | 8.3     | 11.2    | 10.1    | 12.5    |
| Ta                               | 0.9     | 0.9     | 1.1     | 1.5     | 1.6     | 1.3     |
| Ga                               | 18.5    | 17.5    | 22.7    | 20.2    | 20.8    | 23.1    |
| Sc                               | 7       | 7       | 5       | 5       | 5       | 5       |
| Cr                               | 20.53   | 20.53   | NA      | NA      | NA      | 54.74   |
| Ni                               | 8.3     | 4.3     | 2.7     | 4.2     | 3.8     | 17      |
| Co                               | 3.2     | 2.9     | 2.4     | 3.1     | 2.6     | 5.2     |
| V                                | 37      | 40      | 23      | 33      | 22      | 26      |
| Pb                               | 3.4     | 2.6     | 10.4    | 3.4     | 2.8     | 4.7     |
| Zn                               | 56      | 26      | 58      | 46      | 40      | 31      |
| Cu                               | 3.4     | 2.7     | 3.5     | 1.9     | 0.8     | 10.8    |
| Sn                               | 6       | 8       | 9       | 7       | 12      | 12      |
| W                                | 0.9     | 1.9     | 0.9     | 4.6     | 11.5    | 7.4     |
| Be                               | 3       | 4       | 6       | 6       | 5       | 4       |
| Bi                               | 0.2     | 0.1     | 0.8     | 0.2     | 0.3     | 0.9     |
| As                               | 2.5     | 3.1     | 2.9     | 5.9     | 2.4     | 9.1     |
| Mo                               | NA      | NA      | NA      | 0.1     | NA      | 0.5     |
| Sb                               | NA      | 0.1     | NA      | 0.2     | 0.3     | 0.6     |
| Y                                | 20.3    | 23.7    | 10.4    | 12.4    | 10.6    | 14.1    |
| La                               | 22.9    | 25.4    | 27.7    | 17.4    | 21.9    | 22.3    |
| Ce                               | 51.1    | 60      | 59.8    | 38.7    | 50.8    | 52.7    |
| Pr                               | 5.59    | 6.36    | 6.47    | 4.53    | 5.49    | 5.54    |
| Nd                               | 22.4    | 23.9    | 23.9    | 15.4    | 20.2    | 20.1    |
| Sm                               | 4.36    | 4.96    | 4.54    | 4       | 4.12    | 3.99    |
| Eu                               | 0.83    | 1.18    | 0.76    | 0.77    | 0.73    | 0.84    |
| Gd                               | 3.96    | 4.27    | 2.97    | 3.04    | 2.92    | 3.1     |
| Tb                               | 0.63    | 0.71    | 0.42    | 0.45    | 0.41    | 0.5     |
| Dy                               | 3.51    | 3.87    | 2.13    | 2.48    | 2.12    | 2.57    |
| Ho                               | 0.69    | 0.78    | 0.36    | 0.44    | 0.37    | 0.48    |
| Er                               | 1.95    | 2.37    | 0.99    | 1.25    | 1.12    | 1.34    |
| Tm                               | 0.3     | 0.34    | 0.16    | 0.17    | 0.16    | 0.2     |
| Yb                               | 1.95    | 2.07    | 0.95    | 1.27    | 1.07    | 1.3     |
| Lu                               | 0.28    | 0.32    | 0.14    | 0.19    | 0.14    | 0.18    |
| ΣREE                             | 120.45  | 136.53  | 131.29  | 90.09   | 111.55  | 115.14  |
| La <sub>N</sub> /Yb <sub>N</sub> | 7.92    | 8.27    | 19.66   | 9.24    | 13.8    | 11.57   |
| Eu/Eu*                           | 0.61    | 0.78    | 0.63    | 0.68    | 0.64    | 0.73    |
| Rb/Sr                            | 0.72    | 0.61    | 1.01    | 1.12    | 1.25    | 1.27    |
| Rb/Ba                            | 0.26    | 0.17    | 0.35    | 0.32    | 0.35    | 0.37    |

|        | <b>LV10</b> | <b>BR 5</b> | <b>GG10A</b> | <b>GG10C</b> | <b>OR 4</b> | <b>HO 2</b> |
|--------|-------------|-------------|--------------|--------------|-------------|-------------|
| Groups | E_CVG       | E_CVG       | W_CVG        | W_CVG        | W_CVG       | W_CVG       |
| Type   | granite     | granite     | granite      | granite      | granite     | granite     |
| Rb     | 250         | 250.3       | 396.9        | 301.4        | 248.2       | 336         |
| Cs     | 21.8        | 19.5        | 29.2         | 18           | 15.5        | 31.8        |
| Ba     | 859         | 792         | 2175         | 2089         | 1486        | 1434        |
| Sr     | 267.2       | 242.1       | 464.2        | 439.9        | 232.9       | 287.4       |
| Th     | 29.4        | 22.3        | 110.9        | 42.2         | 9           | 33.8        |
| U      | 4.6         | 3.9         | 27.7         | 6.2          | 9.3         | 6.8         |
| Zr     | 159.6       | 144         | 472.7        | 336          | 193.1       | 253.4       |
| Hf     | 4.9         | 4.4         | 14.9         | 10.5         | 5.6         | 8.5         |



|                                  |        |        |        |        |        |        |
|----------------------------------|--------|--------|--------|--------|--------|--------|
| Nb                               | 9.9    | 10.8   | 29.9   | 22.7   | 18.7   | 19.5   |
| Ta                               | 1.1    | 1.4    | 2.8    | 2.5    | 1.5    | 1.8    |
| Ga                               | 20.3   | 21.7   | 20.4   | 20.7   | 21.5   | 20.4   |
| Sc                               | 5      | 5      | 13     | 6      | 11     | 9      |
| Cr                               | 20.53  | 20.53  | 191.58 | 68.42  | 143.68 | 123.16 |
| Ni                               | 4.6    | 4.7    | 70.3   | 29.3   | 27.6   | 27.9   |
| Co                               | 3.2    | 3.1    | 19.2   | 7.5    | 10.3   | 8.5    |
| V                                | 33     | 26     | 75     | 42     | 60     | 46     |
| Pb                               | 6      | 3.3    | 7.9    | 5.2    | 2.6    | 6.5    |
| Zn                               | 48     | 38     | 55     | 48     | 73     | 46     |
| Cu                               | 1.7    | 1.2    | 9.3    | 12.4   | 7.7    | 4.4    |
| Sn                               | 7      | 7      | 12     | 13     | 6      | 12     |
| W                                | 0.8    | 2.4    | 1.3    | 6.2    | 1.6    | 0.7    |
| Be                               | 5      | 5      | 6      | 6      | 3      | 10     |
| Bi                               | 0.2    | 0.1    | 2      | 0.7    | 0.2    | 0.3    |
| As                               | 2.2    | 1.7    | 9.8    | 4.2    | 5.6    | 7.7    |
| Mo                               | NA     | NA     | NA     | NA     | NA     | NA     |
| Sb                               | NA     | 0.2    | 0.8    | 0.8    | NA     | 0.5    |
| Y                                | 12.4   | 11.2   | 41.6   | 15.7   | 25.3   | 17.5   |
| La                               | 32.8   | 20.6   | 62.3   | 51.9   | 15.3   | 32.9   |
| Ce                               | 70.8   | 54.1   | 166.9  | 122.6  | 42.7   | 77.8   |
| Pr                               | 7.68   | 5.12   | 22.01  | 13.93  | 6.24   | 10.01  |
| Nd                               | 28     | 19.2   | 92.7   | 52.1   | 29.5   | 42.1   |
| Sm                               | 4.85   | 3.57   | 19.86  | 9.88   | 7.25   | 8.02   |
| Eu                               | 0.86   | 0.69   | 2.37   | 1.82   | 1.44   | 1.48   |
| Gd                               | 3.26   | 2.65   | 12.85  | 6.28   | 5.16   | 5.14   |
| Tb                               | 0.48   | 0.4    | 1.75   | 0.78   | 0.83   | 0.64   |
| Dy                               | 2.32   | 2.03   | 8.18   | 3.19   | 4.42   | 3.07   |
| Ho                               | 0.4    | 0.38   | 1.39   | 0.54   | 0.8    | 0.57   |
| Er                               | 1.08   | 1.06   | 3.36   | 1.42   | 2.28   | 1.61   |
| Tm                               | 0.18   | 0.17   | 0.41   | 0.21   | 0.37   | 0.24   |
| Yb                               | 1.24   | 1.04   | 2.45   | 1.29   | 2.14   | 1.64   |
| Lu                               | 0.17   | 0.14   | 0.36   | 0.21   | 0.29   | 0.25   |
| ΣREE                             | 154.12 | 111.15 | 396.89 | 266.15 | 118.72 | 185.47 |
| La <sub>N</sub> /Yb <sub>N</sub> | 17.83  | 13.35  | 17.14  | 27.12  | 4.82   | 13.52  |
| Eu/Eu*                           | 0.66   | 0.69   | 0.45   | 0.71   | 0.72   | 0.7    |
| Rb/Sr                            | 0.94   | 1.03   | 0.86   | 0.69   | 1.07   | 1.17   |
| Rb/Ba                            | 0.29   | 0.32   | 0.18   | 0.14   | 0.17   | 0.23   |

|        | GG6     | PA1     | FU 4    | FU 6    | LV5     | G1 5    |
|--------|---------|---------|---------|---------|---------|---------|
| Groups | W_CVG   | W_CVG   | W_CVG   | W_CVG   | W_CVG   | W_CVG   |
| Type   | granite | granite | granite | granite | granite | granite |
| Rb     | 332.7   | 447     | 267.6   | 238     | 267.9   | 355.2   |
| Cs     | 19.1    | 59.1    | 34.7    | 18.7    | 21.6    | 27.1    |
| Ba     | 891     | 711     | 639     | 874     | 685     | 757     |
| Sr     | 192.7   | 217.7   | 163     | 183.6   | 143.5   | 171.7   |
| Th     | 44.1    | 29.5    | 16      | 19.9    | 18.3    | 32.7    |
| U      | 7.8     | 6.2     | 5.5     | 5       | 6.6     | 4.9     |
| Zr     | 306.2   | 278.4   | 154.6   | 161.4   | 152.7   | 223.9   |
| Hf     | 9.5     | 8.5     | 5.1     | 5       | 5.2     | 7.3     |
| Nb     | 18.7    | 19.3    | 9.6     | 8.2     | 11.4    | 17.8    |
| Ta     | 1.8     | 1.9     | 1.1     | 1       | 1.2     | 2.3     |
| Ga     | 22.2    | 22.5    | 22.9    | 21.7    | 23.2    | 24.1    |
| Sc     | 6       | 7       | 6       | 4       | 6       | 5       |
| Cr     | 34.21   | 82.1    | 20.53   | NA      | 20.53   | 34.21   |
| Ni     | 11.6    | 27.4    | 5.2     | 2.8     | 5.7     | 7.7     |
| Co     | 4.4     | 8.1     | 3.2     | 2.8     | 3.5     | 2.9     |
| V      | 28      | 43      | 30      | 13      | 36      | 23      |
| Pb     | 2.9     | 9.3     | 1.8     | 1.8     | 2.6     | 3.6     |

|                                  |        |        |        |        |        |        |
|----------------------------------|--------|--------|--------|--------|--------|--------|
| Zn                               | 34     | 59     | 48     | 33     | 49     | 50     |
| Cu                               | 1.7    | 4.7    | 0.8    | 0.9    | 1.5    | 2.9    |
| Sn                               | 6      | 10     | 6      | 6      | 8      | 13     |
| W                                | 3.3    | 10     | 1.6    | 0.7    | 1.5    | 6.1    |
| Be                               | 4      | 4      | 5      | 5      | 5      | 6      |
| Bi                               | 0.2    | 0.5    | 0.3    | 0.3    | 0.3    | 0.4    |
| As                               | 13.8   | 14.4   | 2.7    | 3.6    | 1.1    | 2.7    |
| Mo                               | NA     | 0.5    | NA     | NA     | NA     | NA     |
| Sb                               | 0.2    | 1      | 0.2    | 0.1    | 0.1    | 0.2    |
| Y                                | 16     | 21.8   | 14.9   | 13.7   | 13.5   | 16.3   |
| La                               | 43.4   | 32.1   | 24.9   | 34.2   | 31.9   | 28.6   |
| Ce                               | 116.8  | 78     | 53.1   | 69.7   | 69.8   | 72.3   |
| Pr                               | 11.88  | 8.62   | 6.28   | 8.16   | 8      | 7.42   |
| Nd                               | 45.8   | 31.3   | 23.2   | 29.9   | 28.9   | 29.3   |
| Sm                               | 8.07   | 6.29   | 4.94   | 5.97   | 5.73   | 5.23   |
| Eu                               | 0.76   | 0.74   | 0.8    | 0.91   | 0.77   | 0.74   |
| Gd                               | 5      | 5.15   | 3.91   | 4.51   | 4.14   | 3.94   |
| Tb                               | 0.71   | 0.81   | 0.59   | 0.61   | 0.59   | 0.58   |
| Dy                               | 3.31   | 4.08   | 2.98   | 2.97   | 2.74   | 3.04   |
| Ho                               | 0.56   | 0.73   | 0.49   | 0.44   | 0.44   | 0.53   |
| Er                               | 1.53   | 1.88   | 1.31   | 1.15   | 1.16   | 1.51   |
| Tm                               | 0.2    | 0.29   | 0.19   | 0.14   | 0.18   | 0.21   |
| Yb                               | 1.29   | 1.7    | 1.29   | 0.92   | 1.15   | 1.35   |
| Lu                               | 0.17   | 0.24   | 0.17   | 0.11   | 0.17   | 0.19   |
| ΣREE                             | 239.48 | 171.93 | 124.15 | 159.69 | 155.67 | 154.94 |
| La <sub>N</sub> /Yb <sub>N</sub> | 22.68  | 12.73  | 13.01  | 25.06  | 18.7   | 14.28  |
| Eu/Eu*                           | 0.37   | 0.4    | 0.56   | 0.54   | 0.48   | 0.5    |
| Rb/Sr                            | 1.73   | 2.05   | 1.64   | 1.3    | 1.87   | 2.07   |
| Rb/Ba                            | 0.37   | 0.63   | 0.42   | 0.27   | 0.39   | 0.47   |

|        | PA5     | HO 4    | HO 3    | RE 2    | BR 11   | RE 5    |
|--------|---------|---------|---------|---------|---------|---------|
| Groups | W_CVG   | W_CVG   | W_CVG   | W_CVG   | W_CVG   | W_CVG   |
| Type   | granite | granite | granite | granite | granite | granite |
| Rb     | 288.4   | 237     | 283.9   | 253.5   | 268.8   | 375.8   |
| Cs     | 25.7    | 39.3    | 28.3    | 22.9    | 22.3    | 29.8    |
| Ba     | 523     | 500     | 375     | 583     | 634     | 659     |
| Sr     | 107.6   | 102.5   | 108.3   | 148.7   | 167.7   | 162.9   |
| Th     | 24.5    | 10.1    | 10.7    | 13.7    | 18.4    | 26.1    |
| U      | 4.7     | 4.7     | 2.5     | 4.5     | 4.6     | 4.5     |
| Zr     | 215.5   | 100.1   | 77.4    | 112.1   | 120.2   | 161.4   |
| Hf     | 6.8     | 3.2     | 3.1     | 3.6     | 4.1     | 5.1     |
| Nb     | 11.3    | 7.8     | 11.8    | 9       | 10.6    | 13.1    |
| Ta     | 1.3     | 0.8     | 1.7     | 1.5     | 1.6     | 1.8     |
| Ga     | 19.1    | 21.1    | 22.8    | 23.4    | 22      | 20.2    |
| Sc     | 7       | 4       | 3       | 4       | 4       | 4       |
| Cr     | 27.37   | NA      | 13.68   | NA      | 13.68   | 13.68   |
| Ni     | 3.2     | 1.2     | 1.6     | 2.2     | 3.6     | 1.4     |
| Co     | 5       | 1.6     | 1.3     | 1.2     | 2.4     | 1.2     |
| V      | 24      | 11      | NA      | NA      | 22      | 18      |
| Pb     | 2.8     | 1.5     | 2.8     | 3.4     | 3.3     | 7.7     |
| Zn     | 43      | 31      | 20      | 39      | 38      | 3       |
| Cu     | 4.3     | NA      | 0.7     | 1.3     | 1.8     | 1.1     |
| Sn     | 11      | 8       | 8       | 11      | 10      | 14      |
| W      | 1.4     | 1.5     | 2.4     | 3.5     | 3.5     | 15      |
| Be     | 4       | 5       | 5       | 10      | 4       | 41      |
| Bi     | 0.7     | 0.1     | 0.1     | 0.6     | 1.3     | 0.5     |
| As     | 4.6     | 8.1     | 5.2     | 2.1     | 1.7     | 16.5    |
| Mo     | 0.4     | NA      | 0.1     | NA      | NA      | NA      |
| Sb     | NA      | 0.2     | 0.6     | 0.2     | NA      | 2.6     |

|                                  |        |        |       |        |       |        |
|----------------------------------|--------|--------|-------|--------|-------|--------|
| Y                                | 31     | 13.3   | 17.4  | 13.2   | 14.9  | 12.9   |
| La                               | 34.8   | 21.4   | 15.6  | 22.2   | 25    | 28.3   |
| Ce                               | 83     | 48.9   | 33.5  | 49.1   | 53.1  | 62.6   |
| Pr                               | 9.29   | 5.55   | 3.89  | 5.51   | 6.04  | 6.62   |
| Nd                               | 33.8   | 20.9   | 14.8  | 20.8   | 22.5  | 23.3   |
| Sm                               | 6.71   | 4.56   | 3.41  | 4.08   | 4.1   | 4.21   |
| Eu                               | 0.81   | 0.69   | 0.59  | 0.68   | 0.69  | 0.64   |
| Gd                               | 5.76   | 3.63   | 3.22  | 3.49   | 3.3   | 3.18   |
| Tb                               | 0.98   | 0.55   | 0.57  | 0.52   | 0.5   | 0.49   |
| Dy                               | 5.49   | 2.76   | 2.83  | 2.6    | 2.52  | 2.3    |
| Ho                               | 1.09   | 0.46   | 0.55  | 0.4    | 0.49  | 0.44   |
| Er                               | 2.94   | 1.31   | 1.49  | 1.07   | 1.36  | 1.21   |
| Tm                               | 0.45   | 0.19   | 0.2   | 0.17   | 0.2   | 0.19   |
| Yb                               | 3      | 1.19   | 1.42  | 1.1    | 1.31  | 1.11   |
| Lu                               | 0.43   | 0.16   | 0.17  | 0.14   | 0.19  | 0.16   |
| ΣREE                             | 188.55 | 112.25 | 82.24 | 111.86 | 121.3 | 134.75 |
| La <sub>N</sub> /Yb <sub>N</sub> | 7.82   | 12.12  | 7.41  | 13.61  | 12.87 | 17.19  |
| Eu/Eu*                           | 0.4    | 0.52   | 0.54  | 0.55   | 0.57  | 0.53   |
| Rb/Sr                            | 2.68   | 2.31   | 2.62  | 1.7    | 1.6   | 2.31   |
| Rb/Ba                            | 0.55   | 0.47   | 0.76  | 0.43   | 0.42  | 0.57   |

|        | GG2     | RE 11   | L3      | RE 4    | GG4     | GG5     |
|--------|---------|---------|---------|---------|---------|---------|
| Groups | W_CVG   | W_CVG   | W_CVG   | W_CVG   | W_CVG   | W_CVG   |
| Type   | granite | granite | granite | granite | granite | granite |
| Rb     | 300.4   | 243.3   | 329     | 264     | 192.5   | 226.7   |
| Cs     | 34.9    | 20.6    | 26.8    | 19.7    | 29.1    | 21      |
| Ba     | 583     | 562     | 604     | 557     | 506     | 545     |
| Sr     | 123.4   | 111.8   | 74.2    | 125.4   | 98.8    | 120     |
| Th     | 21.3    | 13.2    | 17.1    | 14.8    | 12.1    | 8.6     |
| U      | 5       | 4.1     | 4.7     | 7.6     | 3.3     | 3.5     |
| Zr     | 138.7   | 101.3   | 148     | 111.1   | 101.4   | 65.8    |
| Hf     | 4.5     | 3.3     | 4.9     | 3.6     | 3.4     | 2.6     |
| Nb     | 11.2    | 9.1     | 11      | 10.2    | 11.2    | 8.8     |
| Ta     | 1.6     | 1.2     | 1.5     | 1.3     | 1.6     | 1.4     |
| Ga     | 21.1    | 22.6    | 20.5    | 22.9    | 16.9    | 17.9    |
| Sc     | 4       | 4       | 5       | 4       | 5       | 4       |
| Cr     | 13.68   | NA      | 20.53   | NA      | 20.53   | NA      |
| Ni     | 3.2     | 1.6     | 1.9     | 1.9     | 5.4     | 0.8     |
| Co     | 1.9     | 1.5     | 1.9     | 1.3     | 3       | 0.8     |
| V      | 12      | NA      | 8       | 15      | 18      | NA      |
| Pb     | 2.8     | 3.5     | 4.5     | 3.1     | 2.4     | 3.6     |
| Zn     | 34      | 37      | 37      | 41      | 29      | 21      |
| Cu     | 1.2     | 1.1     | 2.1     | 13      | 3.8     | 1.4     |
| Sn     | 16      | 12      | 10      | 13      | 5       | 11      |
| W      | 5.9     | 2.2     | 2.6     | 2.7     | 3.9     | 1.8     |
| Be     | 6       | 3       | 5       | 5       | 3       | 6       |
| Bi     | 0.7     | 0.5     | 1.1     | 0.8     | 0.3     | 1.2     |
| As     | 5.9     | 4.8     | 3.2     | 6.7     | 5.1     | 5.8     |
| Mo     | NA      | NA      | 0.4     | NA      | 0.1     | NA      |
| Sb     | 0.1     | 0.6     | NA      | 0.2     | 0.4     | 0.2     |
| Y      | 11.6    | 12.6    | 22.2    | 11.4    | 28.3    | 15.8    |
| La     | 26.1    | 23.2    | 29.8    | 19.9    | 19.9    | 14.8    |
| Ce     | 56      | 49.5    | 68.7    | 44.4    | 45.9    | 32.3    |
| Pr     | 6.17    | 5.1     | 7.09    | 4.77    | 5.23    | 3.44    |
| Nd     | 22.3    | 19.3    | 25.3    | 17.4    | 20.1    | 12.5    |
| Sm     | 4.1     | 3.53    | 4.7     | 3.42    | 4.38    | 2.62    |
| Eu     | 0.58    | 0.56    | 0.52    | 0.51    | 0.55    | 0.51    |
| Gd     | 2.77    | 2.98    | 3.83    | 2.79    | 4.17    | 2.48    |
| Tb     | 0.45    | 0.44    | 0.66    | 0.46    | 0.78    | 0.47    |

|                                  |        |        |        |       |        |       |
|----------------------------------|--------|--------|--------|-------|--------|-------|
| Dy                               | 2.38   | 2.36   | 3.7    | 2.2   | 4.91   | 2.7   |
| Ho                               | 0.38   | 0.43   | 0.73   | 0.41  | 0.98   | 0.55  |
| Er                               | 1      | 1.18   | 2.01   | 1.02  | 2.92   | 1.56  |
| Tm                               | 0.16   | 0.18   | 0.33   | 0.15  | 0.44   | 0.22  |
| Yb                               | 1.02   | 1.06   | 1.99   | 0.93  | 2.74   | 1.38  |
| Lu                               | 0.13   | 0.16   | 0.3    | 0.14  | 0.37   | 0.2   |
| ΣREE                             | 123.54 | 109.98 | 149.66 | 98.5  | 113.37 | 75.73 |
| La <sub>N</sub> /Yb <sub>N</sub> | 17.25  | 14.76  | 10.1   | 14.43 | 4.9    | 7.23  |
| Eu/Eu*                           | 0.53   | 0.53   | 0.37   | 0.5   | 0.39   | 0.61  |
| Rb/Sr                            | 2.43   | 2.18   | 4.43   | 2.11  | 1.95   | 1.89  |
| Rb/Ba                            | 0.52   | 0.43   | 0.54   | 0.47  | 0.38   | 0.42  |

| <b>EV 380N</b> | <b>CN2</b>  | <b>CN8</b>  | <b>CN6</b>  | <b>CS-12A</b> |
|----------------|-------------|-------------|-------------|---------------|
| CVMg_K         | CVMg_K      | CVMg_K      | CVMg_K      | CVMg_K        |
| Basic rocks    | Dark facies | Dark facies | Dark facies | Dark facies   |
| 175            | 434.4       | 404.5       | 432.7       | 376           |
| 1.4            | 23.5        | 36.3        | 30.6        | 19            |
| 1824           | 1674        | 1417        | 1433        | 1416          |
| 348.3          | 413.4       | 415.3       | 382.7       | 326           |
| 52.4           | 73.3        | 47.9        | 57.7        | 44.6          |
| 4.2            | 18.5        | 20.8        | 19          | 16.49         |
| 392.9          | 385.8       | 343.3       | 430.2       | 385.4         |
| 13.6           | 10.7        | 10.8        | 12.6        | 11.19         |
| 19.6           | 26.2        | 23.4        | 25.7        | 24.11         |
| 0.8            | 1.9         | 2.1         | 1.9         | 2.24          |
| 17.5           | 19.3        | 19.1        | 19.8        | NA            |
| 11             | 18          | 13          | 14          | NA            |
| 143.68         | 376.31      | 239.47      | 266.84      | 260           |
| 39             | 63          | 54.2        | 54.8        | 105           |
| 13             | 21.1        | 14.9        | 16.7        | 15.89         |
| 80             | 116         | 81          | 87          | 74            |
| 5.4            | 17.8        | 14.5        | 11.7        | 54.69         |
| 53             | 65          | 50          | 55          | 100           |
| 24.6           | 22.8        | 8           | 22          | NA            |
| NA             | 13          | 16          | 20          | NA            |
| 0.6            | 7.4         | 3.9         | 1.3         | 2.5           |
| 6              | 5           | 6           | 7           | NA            |
| NA             | 0.3         | 0.3         | 0.3         | NA            |
| 8.4            | 12.8        | 15.8        | 14.9        | 7.1           |
| NA             | 0.3         | 0.5         | 0.8         | NA            |
| NA             | NA          | 0.8         | 0.2         | 0.32          |
| 36.6           | 28.4        | 25.2        | 25.1        | 24            |
| 58.9           | 48.9        | 49.3        | 61.1        | 51.23         |
| 144            | 128.2       | 120.7       | 144.3       | 109           |
| 15.34          | 14.81       | 13.59       | 15.8        | 14.08         |
| 58.1           | 62          | 57.8        | 62.1        | 57.07         |
| 10.91          | 13.88       | 11.95       | 12          | 11.64         |
| 1.85           | 2.11        | 2.02        | 1.87        | 1.89          |
| 8.35           | 8.74        | 7.43        | 7.38        | 7             |
| 1.33           | 1.09        | 0.95        | 0.94        | 0.8           |
| 6.68           | 5.49        | 4.52        | 4.7         | 4.48          |
| 1.24           | 0.94        | 0.8         | 0.8         | 0.78          |
| 3.35           | 2.43        | 2.1         | 2.24        | 2.15          |
| 0.41           | 0.38        | 0.32        | 0.33        | 0.29          |
| 2.29           | 2.38        | 2.12        | 2.15        | 2.08          |
| 0.34           | 0.35        | 0.31        | 0.32        | 0.26          |
| 313.09         | 291.7       | 273.91      | 316.03      | 262.75        |
| 17.34          | 13.85       | 15.68       | 19.16       | 16.61         |
| 0.59           | 0.59        | 0.66        | 0.61        | 0.64          |
| 0.5            | 1.05        | 0.97        | 1.13        | 1.15          |
| 0.1            | 0.26        | 0.29        | 0.3         | 0.27          |

| <b>CS-10B</b> | <b>CS-16A</b> | <b>CS-45A</b> | <b>BR 13</b> | <b>CS-21A</b> |
|---------------|---------------|---------------|--------------|---------------|
| CVMg_K        | CVMg_K        | CVMg_K        | CVMg_K       | CVMg_K        |
| Light facies  | Light facies  | Light facies  | Light facies | Light facies  |
| 371           | 324           | 353           | 523.6        | 340           |
| 40            | 22            | 34            | 125          | 29            |
| 1343          | 1125          | 1275          | 1453         | 1034          |
| 311           | 236           | 299           | 258.2        | 249           |

|       |        |        |        |        |
|-------|--------|--------|--------|--------|
| 54.24 | 46.93  | 63.16  | 46.6   | 42.03  |
| 16.88 | 17.3   | 24.7   | 8.9    | 14.65  |
| 373.4 | 311.3  | 287.3  | 302.6  | 280.4  |
| 10.68 | 9.15   | 8.11   | 9.2    | 8.12   |
| 22.74 | 21.17  | 21.72  | 19     | 25.38  |
| 2.05  | 1.92   | 1.7    | 1.9    | 2.91   |
| NA    | NA     | NA     | 20.4   | NA     |
| NA    | NA     | NA     | 10     | NA     |
| 230   | 250    | 250    | 143.68 | 300    |
| 94    | 91     | 49     | 33.1   | 102    |
| 12.77 | 13.56  | 13.53  | 10.8   | 14.67  |
| 66    | 69     | 71     | 66     | 76     |
| 51.26 | 22.61  | 42.19  | 5.9    | 38.09  |
| 70    | 90     | 80     | 65     | 90     |
| 20    | NA     | NA     | 8.1    | NA     |
| NA    | NA     | NA     | 6      | NA     |
| 3.2   | 2.6    | 4.4    | 14.8   | 18.7   |
| NA    | NA     | NA     | 8      | NA     |
| NA    | NA     | NA     | 0.2    | NA     |
| 4.9   | 4.1    | 6.3    | 17.4   | 5.4    |
| NA    | NA     | 0.5    | NA     | NA     |
| 0.14  | 0.2    | 0.1    | 0.8    | 0.15   |
| 23    | 23     | 24     | 19.4   | 25     |
| 69.16 | 53.64  | 54.74  | 30.5   | 51.42  |
| 139   | 113    | 114    | 87     | 110    |
| 16.65 | 14.01  | 14.21  | 10.18  | 14.2   |
| 63.93 | 55.78  | 57.01  | 46.6   | 57.93  |
| 12.22 | 11.23  | 11.61  | 8.99   | 12.02  |
| 1.87  | 1.7    | 1.75   | 1.63   | 1.51   |
| 7.2   | 6.5    | 6.8    | 5.82   | 7.1    |
| 0.9   | 0.8    | 0.8    | 0.76   | 0.8    |
| 4.46  | 4.1    | 4.29   | 3.65   | 4.55   |
| 0.76  | 0.71   | 0.71   | 0.69   | 0.74   |
| 2.12  | 2.01   | 1.97   | 1.84   | 2.09   |
| 0.3   | 0.27   | 0.23   | 0.29   | 0.26   |
| 1.97  | 1.93   | 1.86   | 1.87   | 1.96   |
| 0.26  | 0.23   | 0.2    | 0.26   | 0.21   |
| 320.8 | 265.91 | 270.18 | 200.08 | 264.79 |
| 23.67 | 18.74  | 19.84  | 11     | 17.69  |
| 0.61  | 0.61   | 0.6    | 0.69   | 0.5    |
| 1.19  | 1.37   | 1.18   | 2.03   | 1.37   |
| 0.28  | 0.29   | 0.28   | 0.36   | 0.33   |

| ME3          | CN11         | GO4          | CN10         | GO1          |
|--------------|--------------|--------------|--------------|--------------|
| CVMg_K       | CVMg_K       | CVMg_K       | CVMg_K       | CVMg_K       |
| Light facies |
| 382.6        | 373.3        | 284.4        | 334.1        | 284.4        |
| 27.5         | 6.9          | 6.5          | 9.7          | 6.5          |
| 1208         | 1267         | 1162         | 1288         | 1202         |
| 319.8        | 263.4        | 247          | 363.4        | 291.3        |
| 43.3         | 45.4         | 42.2         | 45           | 43.3         |
| 11.3         | 8            | 8.3          | 10.2         | 8.7          |
| 240.8        | 358          | 254.6        | 353.4        | 240.3        |
| 7.6          | 11.2         | 7.6          | 10.2         | 8            |
| 16.8         | 24.3         | 16.5         | 23.7         | 16.2         |
| 1.8          | 2.2          | 1.5          | 2            | 1.5          |
| 20           | 21.8         | 19.7         | 21.2         | 19.5         |
| 10           | 9            | 8            | 9            | 8            |
| 123.16       | 116.31       | 109.47       | 143.68       | 150.52       |

|        |        |        |        |        |
|--------|--------|--------|--------|--------|
| 27.9   | 38.5   | 30.7   | 38     | 23.7   |
| 9      | 13.1   | 9      | 11.6   | 7.6    |
| 55     | 52     | 50     | 52     | 52     |
| 27.8   | 10.7   | 35.7   | 7.8    | 5.2    |
| 60     | 60     | 52     | 33     | 34     |
| 8      | 60.1   | 4.2    | 19.5   | 4.5    |
| 8      | 15     | 9      | 24     | 9      |
| 0.6    | 5.3    | 1.5    | 3.1    | 4.1    |
| 8      | 9      | 7      | 7      | 5      |
| 0.3    | 1.1    | 0.2    | 9.8    | 0.2    |
| 7.8    | 15.2   | 10     | 9.2    | 8.6    |
| 0.7    | 0.3    | 0.5    | 1.3    | 0.4    |
| 0.1    | 0.4    | 0.4    | 0.4    | 0.1    |
| 20.5   | 17.3   | 19.1   | 15.8   | 18.2   |
| 37.6   | 66.1   | 35     | 48.7   | 29.7   |
| 93.9   | 155.1  | 88.4   | 143.1  | 87.4   |
| 11.34  | 14.63  | 10.33  | 11.86  | 9.81   |
| 48.9   | 54.7   | 44.2   | 44.1   | 42.1   |
| 9.64   | 8.33   | 8.94   | 7.66   | 8.63   |
| 1.56   | 1.29   | 1.52   | 1.39   | 1.36   |
| 5.88   | 4.64   | 5.39   | 4.51   | 5.38   |
| 0.76   | 0.63   | 0.72   | 0.6    | 0.72   |
| 3.61   | 3.05   | 3.53   | 3.1    | 3.64   |
| 0.67   | 0.57   | 0.66   | 0.55   | 0.65   |
| 2      | 1.6    | 1.83   | 1.53   | 1.74   |
| 0.3    | 0.25   | 0.27   | 0.23   | 0.27   |
| 1.92   | 1.51   | 1.72   | 1.61   | 1.73   |
| 0.3    | 0.23   | 0.27   | 0.23   | 0.26   |
| 218.38 | 312.63 | 202.78 | 269.17 | 193.39 |
| 13.2   | 29.51  | 13.72  | 20.39  | 11.57  |
| 0.63   | 0.63   | 0.67   | 0.72   | 0.61   |
| 1.2    | 1.42   | 1.15   | 0.92   | 0.98   |
| 0.32   | 0.29   | 0.24   | 0.26   | 0.24   |

| VOS4           | VOS6           | VOS2           | VOS7           | VOS1           |
|----------------|----------------|----------------|----------------|----------------|
| SVMg_K         | SVMg_K         | SVMg_K         | SVMg_K         | SVMg_K         |
| Volcanic rocks |
| 84.1           | 231.4          | 246.7          | 248.1          | 153.6          |
| 20.7           | 19.6           | 14             | 10.7           | 8.3            |
| 3433           | 2020           | 1666           | 1633           | 1176           |
| 971.2          | 726.5          | 394            | 356.5          | 344.7          |
| 13             | 53.7           | 41.8           | 38.2           | 18.3           |
| 4.2            | 14.5           | 15.7           | 12.5           | 6.2            |
| 97.5           | 276.5          | 192.9          | 185.8          | 171.5          |
| 2.5            | 7.5            | 5.7            | 5.9            | 5.3            |
| 4.4            | 15.8           | 13             | 12.1           | 10.1           |
| 0.3            | 1.2            | 1.3            | 1.1            | 0.9            |
| 18.2           | 15.1           | 17.1           | 17.1           | 17.5           |
| 24             | 19             | 13             | 12             | 14             |
| 27.37          | 88.95          | 82.1           | 68.42          | 34.21          |
| 15.5           | 25             | 18.5           | 18.4           | 9.8            |
| 25.3           | 21.9           | 11.8           | 11.8           | 10             |
| 277            | 154            | 92             | 84             | 86             |
| 22.7           | 23.9           | 17.9           | 10.4           | 28.4           |
| 74             | 46             | 54             | 88             | 70             |
| 60.2           | 42.5           | 20.7           | 6.6            | 13.7           |
| 2              | 3              | 6              | 5              | 3              |
| 1.7            | 3              | 2              | 2.9            | 2.2            |
| 1              | 4              | 6              | 5              | 2              |

|        |        |        |        |        |
|--------|--------|--------|--------|--------|
| 0.1    | NA     | 0.2    | 0.2    | 0.2    |
| 25.7   | 12.2   | 30.1   | 32.5   | 11.8   |
| 0.8    | 0.9    | 0.4    | 0.5    | 0.6    |
| 0.5    | 0.4    | 0.8    | 0.6    | 0.7    |
| 26.9   | 24.1   | 26.1   | 20.9   | 23.5   |
| 31.3   | 48.4   | 44.1   | 35.8   | 33.3   |
| 68.6   | 104    | 84.3   | 75.6   | 70.8   |
| 7.66   | 11.33  | 10.15  | 8.3    | 7.43   |
| 29.9   | 42.8   | 40.3   | 32     | 27.3   |
| 6.22   | 7.34   | 7.01   | 5.84   | 4.91   |
| 1.71   | 1.5    | 1.37   | 1.2    | 1.04   |
| 5.77   | 5.69   | 5.49   | 4.41   | 4.18   |
| 0.89   | 0.81   | 0.81   | 0.7    | 0.7    |
| 4.81   | 4.37   | 4.18   | 3.54   | 3.97   |
| 0.94   | 0.8    | 0.81   | 0.71   | 0.8    |
| 2.56   | 2.24   | 2.4    | 2.14   | 2.28   |
| 0.37   | 0.34   | 0.35   | 0.31   | 0.35   |
| 2.29   | 2.22   | 2.13   | 1.93   | 2.27   |
| 0.36   | 0.33   | 0.34   | 0.31   | 0.36   |
| 163.38 | 232.17 | 203.74 | 172.79 | 159.69 |
| 9.21   | 14.7   | 13.96  | 12.51  | 9.89   |
| 0.87   | 0.71   | 0.68   | 0.72   | 0.7    |
| 0.09   | 0.32   | 0.63   | 0.7    | 0.45   |
| 0.02   | 0.11   | 0.15   | 0.15   | 0.13   |

| <b>BA11</b>     | <b>BA7</b>      | <b>BA2</b>      | <b>BA1</b>      | <b>BA8</b>      |
|-----------------|-----------------|-----------------|-----------------|-----------------|
| SVMg_K          | SVMg_K          | SVMg_K          | SVMg_K          | SVMg_K          |
| Porphy. granite |
| 302.8           | 395.1           | 418             | 461.7           | 336.1           |
| 12.6            | 24.6            | 16.6            | 23.9            | 15.2            |
| 1000            | 1497            | 1409            | 1431            | 1115            |
| 328.6           | 445.5           | 376.6           | 381.7           | 413             |
| 56.7            | 59.1            | 55.4            | 59.7            | 59.8            |
| 24              | 22.2            | 9.2             | 18.9            | 16.5            |
| 175.5           | 164.8           | 203.9           | 207.7           | 208.4           |
| 6               | 5.2             | 6.4             | 6.9             | 6.4             |
| 13.5            | 15.6            | 16              | 16.6            | 16.2            |
| 1.5             | 1.9             | 1.9             | 2.1             | 2               |
| 14.6            | 15.8            | 16.8            | 16.8            | 16.9            |
| 10              | 10              | 10              | 11              | 9               |
| 102.63          | 102.63          | 75.26           | 102.63          | 61.58           |
| 21.3            | 17              | 23.5            | 22.9            | 19.1            |
| 11.6            | 11              | 11.8            | 11              | 10.3            |
| 77              | 88              | 82              | 87              | 75              |
| 5.3             | 8               | 9.9             | 8.8             | 8.1             |
| 42              | 52              | 37              | 36              | 101             |
| 2               | 70.6            | 7.3             | 1.3             | 2               |
| 5               | 7               | 6               | 7               | 5               |
| 2.9             | 1.5             | 3.8             | 5.1             | 6.3             |
| 5               | 5               | 5               | 6               | 6               |
| 0.2             | 0.2             | 0.3             | 0.2             | 0.2             |
| 8.4             | 19.2            | 13.6            | 8.3             | 4.8             |
| 0.5             | 1.7             | 0.5             | 1               | 0.8             |
| 0.1             | 0.6             | 0.3             | 0.7             | 0.3             |
| 15.1            | 19.8            | 16.1            | 22.7            | 18.4            |
| 25.2            | 35.8            | 35.9            | 46.1            | 37.1            |
| 50.1            | 78              | 70.3            | 82.1            | 77.4            |
| 5.88            | 8.93            | 7.61            | 10.76           | 8.28            |
| 22.7            | 33.8            | 28.3            | 39.9            | 30.9            |



|       |        |        |        |        |
|-------|--------|--------|--------|--------|
| 4.46  | 6.25   | 4.91   | 7.07   | 5.63   |
| 0.9   | 1.13   | 0.94   | 1.32   | 1      |
| 3.42  | 4.49   | 3.47   | 5.32   | 4      |
| 0.51  | 0.67   | 0.54   | 0.77   | 0.58   |
| 2.58  | 3.29   | 2.73   | 3.59   | 2.96   |
| 0.52  | 0.65   | 0.51   | 0.72   | 0.58   |
| 1.4   | 1.75   | 1.44   | 2.05   | 1.57   |
| 0.23  | 0.28   | 0.25   | 0.32   | 0.26   |
| 1.55  | 1.84   | 1.58   | 2.02   | 1.63   |
| 0.25  | 0.28   | 0.26   | 0.32   | 0.27   |
| 119.7 | 177.16 | 158.74 | 202.36 | 172.16 |
| 10.96 | 13.12  | 15.32  | 15.39  | 15.35  |
| 0.7   | 0.65   | 0.7    | 0.66   | 0.64   |
| 0.92  | 0.89   | 1.11   | 1.21   | 0.81   |
| 0.3   | 0.26   | 0.3    | 0.32   | 0.3    |

| BA10            | CO4        | CO2A       | CO1        | CO3        |
|-----------------|------------|------------|------------|------------|
| SVMg_K          | SVMg_K     | SVMg_K     | SVMg_K     | SVMg_K     |
| Porphy. granite | FG granite | FG granite | FG granite | FG granite |
| 427.8           | 337.2      | 283.4      | 214.1      | 479.8      |
| 15.1            | 12.3       | 19.5       | 22.9       | 61.6       |
| 1060            | 1459       | 1145       | 1013       | 1597       |
| 278.8           | 350.8      | 330.8      | 355.7      | 332.2      |
| 62.6            | 50         | 27.9       | 19.1       | 52.4       |
| 22.1            | 12.4       | 4          | 9.6        | 14.4       |
| 201             | 286.8      | 157.8      | 159.5      | 281.4      |
| 6.6             | 9          | 5.2        | 5          | 8.9        |
| 15.4            | 18.3       | 13.2       | 12         | 19.7       |
| 2               | 1.5        | 1.6        | 1.2        | 1.6        |
| 15.3            | 20.5       | 18.4       | 18.1       | 19.4       |
| 9               | 10         | 9          | 9          | 11         |
| 61.58           | 130        | 68.42      | 47.89      | 164.21     |
| 18.3            | 29.9       | 16         | 14.9       | 35.5       |
| 9.8             | 12.1       | 8.9        | 8.6        | 13         |
| 69              | 67         | 69         | 63         | 64         |
| 11.3            | 3.9        | 3.1        | 106.3      | 6.1        |
| 49              | 68         | 68         | 71         | 61         |
| 4.1             | 4.3        | 6.9        | 11.8       | 8.6        |
| 6               | 5          | 14         | 7          | 10         |
| 40.9            | 5          | 5          | 2          | 15         |
| 5               | 7          | 3          | 3          | 6          |
| 0.1             | 0.3        | 0.1        | 0.2        | 1.1        |
| 3.2             | 32.6       | 34.3       | 6          | 22.2       |
| 0.9             | 0.2        | 0.3        | 0.7        | 0.4        |
| NA              | 0.1        | 0.2        | 0.1        | 0.6        |
| 17.1            | 19         | 20.1       | 20.6       | 18.7       |
| 40.7            | 31.8       | 32.9       | 38.2       | 33.1       |
| 74.4            | 97.8       | 73.5       | 77.4       | 80.4       |
| 8.71            | 10.61      | 8.09       | 8.83       | 10.67      |
| 30.5            | 46.8       | 28.7       | 32.1       | 49.4       |
| 5.44            | 9.59       | 5.11       | 5.73       | 10.56      |
| 1.02            | 1.49       | 0.82       | 0.97       | 1.93       |
| 3.97            | 5.79       | 4.24       | 4.42       | 6.32       |
| 0.57            | 0.76       | 0.69       | 0.67       | 0.79       |
| 2.8             | 3.51       | 3.66       | 3.57       | 3.59       |
| 0.56            | 0.66       | 0.72       | 0.68       | 0.63       |
| 1.54            | 1.78       | 1.97       | 1.87       | 1.65       |
| 0.25            | 0.28       | 0.31       | 0.31       | 0.25       |
| 1.68            | 1.69       | 1.89       | 1.94       | 1.57       |

|        |        |        |        |        |
|--------|--------|--------|--------|--------|
| 0.27   | 0.26   | 0.29   | 0.29   | 0.25   |
| 172.41 | 212.82 | 162.89 | 176.98 | 201.11 |
| 16.33  | 12.69  | 11.74  | 13.28  | 14.21  |
| 0.67   | 0.61   | 0.54   | 0.59   | 0.72   |
| 1.53   | 0.96   | 0.86   | 0.6    | 1.44   |
| 0.4    | 0.23   | 0.25   | 0.21   | 0.3    |

| <b>WI 4</b> | <b>TF1</b> | <b>BR 12</b> | <b>TF9</b> | <b>HO 5</b> |
|-------------|------------|--------------|------------|-------------|
| E_CVG       | E_CVG      | E_CVG        | E_CVG      | E_CVG       |
| granite     | granite    | granite      | granite    | granite     |
| 281.8       | 240.3      | 260.8        | 255.9      | 251.3       |
| 28.4        | 12.6       | 24.9         | 23.4       | 35.4        |
| 832         | 1022       | 817          | 886        | 845         |
| 199         | 303.8      | 361.1        | 268.4      | 188.8       |
| 20.6        | 27.1       | 31.5         | 27.4       | 26.8        |
| 4.4         | 6.3        | 5.3          | 5.7        | 4           |
| 152.2       | 157        | 171.7        | 166.8      | 164.1       |
| 4.8         | 5.2        | 5.6          | 5.8        | 5.5         |
| 10.7        | 9.9        | 11.7         | 11.2       | 9.8         |
| 1.1         | 0.9        | 1.4          | 1.2        | 1.1         |
| 23.4        | 21.7       | 21.2         | 22.3       | 20.9        |
| 6           | 6          | 6            | 6          | 6           |
| 20.53       | 20.53      | 20.53        | 20.53      | 20.53       |
| 5.6         | 5.8        | 5.1          | 6.2        | 4.5         |
| 4.1         | 3.8        | 3.3          | 3.7        | 3.2         |
| 23          | 35         | 35           | 37         | 26          |
| 2           | 4.7        | 3.2          | 5          | 2.3         |
| 48          | 51         | 31           | 50         | 39          |
| 1.2         | 6          | 2.4          | 3.7        | 3.4         |
| 8           | 7          | 9            | 8          | 8           |
| 4.1         | 0.8        | 2.3          | 0.9        | 2.5         |
| 4           | 4          | 7            | 6          | 2           |
| 0.3         | 0.3        | 0.5          | 0.1        | 0.2         |
| 6.1         | 8.4        | 39.1         | 7.2        | 5.1         |
| NA          | NA         | 0.3          | NA         | 0.1         |
| 0.2         | 0.1        | 1.5          | 0.1        | 0.7         |
| 14          | 12.8       | 14.8         | 14.5       | 12.8        |
| 20.5        | 28.9       | 36.9         | 33.6       | 26.8        |
| 44.5        | 75.4       | 77.4         | 67.9       | 57          |
| 4.7         | 7.2        | 8.6          | 7.92       | 6.5         |
| 16.1        | 25.8       | 32.5         | 28.5       | 23.6        |
| 3.52        | 4.74       | 5.5          | 5.44       | 4.49        |
| 0.82        | 0.92       | 0.96         | 0.92       | 0.71        |
| 3.45        | 3.38       | 3.87         | 3.75       | 3.27        |
| 0.54        | 0.49       | 0.53         | 0.54       | 0.47        |
| 2.62        | 2.42       | 2.66         | 2.68       | 2.43        |
| 0.43        | 0.42       | 0.45         | 0.46       | 0.44        |
| 1.36        | 1.19       | 1.41         | 1.28       | 1.12        |
| 0.19        | 0.19       | 0.19         | 0.2        | 0.18        |
| 1.32        | 1.25       | 1.28         | 1.39       | 1.11        |
| 0.2         | 0.18       | 0.19         | 0.19       | 0.16        |
| 100.25      | 152.48     | 172.44       | 154.77     | 128.28      |
| 10.47       | 15.59      | 19.44        | 16.3       | 16.28       |
| 0.72        | 0.7        | 0.64         | 0.62       | 0.57        |
| 1.42        | 0.79       | 0.72         | 0.95       | 1.33        |
| 0.34        | 0.24       | 0.32         | 0.29       | 0.3         |

| <b>GG3</b> | <b>BR 4</b> | <b>LV3</b> | <b>TF7</b> | <b>BR 10</b> |
|------------|-------------|------------|------------|--------------|
| E_CVG      | E_CVG       | E_CVG      | E_CVG      | E_CVG        |

| granite | granite | granite | granite | granite |
|---------|---------|---------|---------|---------|
| 317.4   | 237.9   | 253.8   | 257.5   | 246.6   |
| 19.2    | 25.1    | 16.4    | 15.2    | 25.1    |
| 952     | 924     | 785     | 757     | 584     |
| 274.6   | 294.5   | 256     | 296.8   | 187.9   |
| 29.4    | 27.9    | 21.2    | 27.7    | 15.1    |
| 6.5     | 5.4     | 5.7     | 12.7    | 8.5     |
| 265.1   | 173.3   | 150.9   | 138.6   | 112.2   |
| 9.1     | 5.4     | 5       | 4.4     | 3.9     |
| 14.8    | 10      | 11.1    | 10.2    | 10.8    |
| 1.4     | 0.9     | 1.3     | 1.5     | 1.6     |
| 21.7    | 21      | 21.9    | 20.6    | 20.1    |
| 4       | 5       | 5       | 5       | 5       |
| 34.21   | 20.53   | 20.53   | 20.53   | NA      |
| 12.3    | 5.5     | 4.2     | 5.2     | 3.4     |
| 3.2     | 4       | 3.1     | 3.1     | 2.2     |
| 16      | 34      | 35      | 29      | 19      |
| 4.6     | 2.7     | 15.2    | 9.1     | 5.5     |
| 42      | 45      | 46      | 62      | 39      |
| 1.3     | 1.5     | 6.6     | 2.2     | 4.2     |
| 13      | 5       | 9       | 9       | 13      |
| 2.7     | 1.8     | 2.2     | 0.8     | 2.3     |
| 8       | 6       | 5       | 8       | 7       |
| 0.3     | 0.1     | 0.5     | 0.5     | 1.2     |
| 2.2     | 8.9     | 4.6     | 9.8     | 9.2     |
| NA      | NA      | NA      | NA      | NA      |
| 0.1     | 0.1     | NA      | NA      | 0.1     |
| 10.9    | 14.9    | 12.8    | 12.7    | 13.2    |
| 40.7    | 34.7    | 28.3    | 32.1    | 22.9    |
| 88.7    | 74.1    | 62.6    | 68.9    | 49.2    |
| 9.08    | 8.15    | 6.66    | 7.57    | 5.47    |
| 31.7    | 29.8    | 23.4    | 27.1    | 20.5    |
| 5.03    | 5.44    | 4.66    | 5.06    | 3.89    |
| 0.88    | 0.99    | 0.81    | 0.85    | 0.69    |
| 3.11    | 3.7     | 3.34    | 3.49    | 3.19    |
| 0.45    | 0.55    | 0.5     | 0.49    | 0.47    |
| 2.1     | 2.82    | 2.36    | 2.37    | 2.36    |
| 0.36    | 0.5     | 0.42    | 0.39    | 0.44    |
| 0.97    | 1.33    | 1.2     | 1.15    | 1.21    |
| 0.15    | 0.19    | 0.19    | 0.18    | 0.19    |
| 0.94    | 1.17    | 1.17    | 1.14    | 1.16    |
| 0.13    | 0.17    | 0.18    | 0.16    | 0.16    |
| 184.3   | 163.61  | 135.79  | 150.95  | 111.83  |
| 29.19   | 20      | 16.31   | 18.98   | 13.31   |
| 0.68    | 0.67    | 0.63    | 0.62    | 0.6     |
| 1.16    | 0.81    | 0.99    | 0.87    | 1.31    |
| 0.33    | 0.26    | 0.32    | 0.34    | 0.42    |

| <b>WI 5</b> | <b>HO 7</b> | <b>GG9</b> | <b>LV7</b> | <b>G1 3</b> |
|-------------|-------------|------------|------------|-------------|
| W_CVG       | W_CVG       | W_CVG      | W_CVG      | W_CVG       |
| granite     | granite     | granite    | granite    | granite     |
| 266         | 307.9       | 259.6      | 221.8      | 376.1       |
| 14.9        | 12.5        | 25.2       | 16.8       | 36          |
| 936         | 1092        | 1196       | 878        | 769         |
| 251.3       | 250.2       | 287.9      | 225.8      | 216.6       |
| 32.1        | 39.3        | 93         | 21.3       | 41          |
| 12.7        | 8.2         | 13.8       | 5.1        | 9.6         |
| 264.5       | 234.3       | 504.2      | 168.4      | 245.2       |
| 8.8         | 7.9         | 15.2       | 5.6        | 8.3         |

|        |        |       |        |        |
|--------|--------|-------|--------|--------|
| 14.5   | 17     | 18    | 10.1   | 17.8   |
| 1.7    | 1.6    | 2.2   | 1      | 2.2    |
| 18.5   | 21.9   | 19.2  | 23.1   | 24.1   |
| 8      | 8      | 8     | 6      | 5      |
| 82.1   | 82.1   | 82.1  | 20.53  | 34.21  |
| 20.4   | 22.1   | 14.7  | 4.8    | 6.7    |
| 8      | 7.2    | 8.5   | 3.3    | 3.2    |
| 45     | 39     | 32    | 39     | 22     |
| 2.8    | 1.9    | 4.5   | 3.3    | 4.4    |
| 35     | 38     | 46    | 41     | 51     |
| 2      | 1.9    | 7.4   | 1.4    | 3.4    |
| 8      | 10     | 7     | 6      | 17     |
| 2.8    | 2.2    | 0.8   | 0.9    | 4.2    |
| 5      | 9      | 6     | 6      | 12     |
| 0.7    | 0.3    | 0.6   | NA     | 0.6    |
| 12     | 6      | 5.3   | 1      | 5.1    |
| NA     | NA     | NA    | NA     | NA     |
| 0.2    | 0.2    | 0.2   | 0.2    | 0.2    |
| 19.1   | 19.4   | 18.6  | 14.1   | 15.8   |
| 43.9   | 42.5   | 133   | 32     | 36.3   |
| 100.9  | 121.7  | 284.1 | 75.3   | 79.5   |
| 11.56  | 11.32  | 29.28 | 7.48   | 9.11   |
| 46.3   | 45.9   | 97    | 26.5   | 34.6   |
| 8.42   | 8.4    | 12.69 | 5.23   | 5.8    |
| 1.3    | 1.28   | 1.47  | 0.91   | 0.79   |
| 5.08   | 5.69   | 7.57  | 3.63   | 4.01   |
| 0.69   | 0.77   | 0.87  | 0.55   | 0.59   |
| 3.34   | 4.04   | 3.69  | 2.66   | 2.82   |
| 0.63   | 0.65   | 0.67  | 0.49   | 0.53   |
| 1.68   | 1.83   | 1.89  | 1.34   | 1.41   |
| 0.27   | 0.27   | 0.25  | 0.2    | 0.21   |
| 1.72   | 1.74   | 1.78  | 1.23   | 1.34   |
| 0.26   | 0.25   | 0.24  | 0.17   | 0.18   |
| 226.05 | 246.34 | 574.5 | 157.69 | 177.19 |
| 17.21  | 16.47  | 50.38 | 17.54  | 18.26  |
| 0.61   | 0.57   | 0.46  | 0.64   | 0.5    |
| 1.06   | 1.23   | 0.9   | 0.98   | 1.74   |
| 0.28   | 0.28   | 0.22  | 0.25   | 0.49   |

| <b>FU 1</b> | <b>G1 2</b> | <b>PA4</b> | <b>G1 6</b> | <b>RE 12</b> |
|-------------|-------------|------------|-------------|--------------|
| W_CVG       | W_CVG       | W_CVG      | W_CVG       | W_CVG        |
| granite     | granite     | granite    | granite     | granite      |
| 247.1       | 333.9       | 254.4      | 391.2       | 272.5        |
| 16.5        | 20.9        | 17.6       | 31.4        | 32.5         |
| 591         | 716         | 540        | 782         | 584          |
| 138.1       | 178.9       | 87.7       | 198.3       | 122.4        |
| 11.5        | 36.8        | 21.6       | 32.4        | 16.9         |
| 4.8         | 4.9         | 3.9        | 4.9         | 4.8          |
| 110.3       | 213         | 172.8      | 244.2       | 121.2        |
| 3.8         | 7.2         | 5.6        | 7.9         | 4.6          |
| 7.6         | 18.6        | 11.1       | 11.2        | 11.6         |
| 0.8         | 2.6         | 1.5        | 0.9         | 1.5          |
| 23.5        | 21.7        | 19.2       | 23.5        | 22.2         |
| 5           | 5           | 7          | 4           | 4            |
| NA          | 34.21       | NA         | 27.37       | NA           |
| 3           | 7.8         | 3.6        | 7           | 1.9          |
| 2.1         | 4           | 7.6        | 3.3         | 1.6          |
| 25          | 19          | 26         | 19          | 13           |
| 2.5         | 2.6         | 3.3        | 3.9         | 3.4          |

|       |        |        |        |       |
|-------|--------|--------|--------|-------|
| 24    | 37     | 40     | 43     | 46    |
| 17.6  | 1      | 1.7    | 1.4    | 1.3   |
| 9     | 13     | 11     | 15     | 15    |
| 2.9   | 4.1    | 1.9    | 4.3    | 5.9   |
| 5     | 4      | 3      | 12     | 5     |
| 0.7   | 0.2    | 0.5    | 0.5    | 1.3   |
| 6.7   | 8.6    | 6      | 4.7    | 13.2  |
| 0.1   | NA     | 0.3    | NA     | NA    |
| 0.4   | 0.3    | NA     | 0.2    | 0.2   |
| 12.2  | 15     | 25.1   | 13.7   | 11.3  |
| 22.3  | 23.2   | 31.5   | 24.4   | 21.3  |
| 47.6  | 50.8   | 76.8   | 61.1   | 44.1  |
| 5.63  | 5.22   | 7.74   | 5.6    | 4.92  |
| 22    | 19.4   | 29.5   | 21.6   | 17.8  |
| 4.59  | 3.28   | 5.79   | 3.69   | 3.1   |
| 0.78  | 0.62   | 0.57   | 0.63   | 0.56  |
| 3.57  | 2.81   | 4.81   | 2.86   | 2.41  |
| 0.49  | 0.48   | 0.79   | 0.47   | 0.39  |
| 2.38  | 2.56   | 4.3    | 2.58   | 2.08  |
| 0.38  | 0.51   | 0.89   | 0.44   | 0.37  |
| 1.06  | 1.41   | 2.45   | 1.21   | 1.04  |
| 0.15  | 0.22   | 0.41   | 0.2    | 0.17  |
| 0.94  | 1.38   | 2.44   | 1.24   | 1.06  |
| 0.13  | 0.19   | 0.38   | 0.16   | 0.14  |
| 112   | 112.08 | 168.37 | 126.18 | 99.44 |
| 15.99 | 11.33  | 8.7    | 13.27  | 13.55 |
| 0.59  | 0.62   | 0.33   | 0.59   | 0.63  |
| 1.79  | 1.87   | 2.9    | 1.97   | 2.23  |
| 0.42  | 0.47   | 0.47   | 0.5    | 0.47  |

| <b>GG8</b> | <b>G1 7</b> | <b>RE 6</b> | <b>RE 9</b> | <b>RE 7</b> |
|------------|-------------|-------------|-------------|-------------|
| W_CVG      | W_CVG       | W_CVG       | W_CVG       | W_CVG       |
| granite    | granite     | granite     | granite     | granite     |
| 197.1      | 340.3       | 366         | 246.1       | 306.2       |
| 17         | 21.5        | 60          | 23.6        | 49.4        |
| 647        | 640         | 599         | 608         | 613         |
| 134.8      | 161.3       | 87.8        | 108.9       | 113.6       |
| 7.7        | 37.1        | 8.8         | 8.4         | 12.4        |
| 5.3        | 6.8         | 3.8         | 4.2         | 4.7         |
| 61.7       | 208.2       | 82.2        | 87.7        | 98.8        |
| 2.3        | 6.8         | 3           | 3.3         | 3.5         |
| 7.2        | 16          | 8.3         | 8.2         | 9.4         |
| 1.1        | 2.4         | 1.3         | 1.2         | 1.5         |
| 16.9       | 23.7        | 21.9        | 23.3        | 22.9        |
| 3          | 4           | 4           | 4           | 4           |
| NA         | 27.37       | NA          | NA          | NA          |
| 1.5        | 5           | 1.2         | 1.5         | 1.5         |
| 1.1        | 2.9         | 0.9         | 1.4         | 2.5         |
| NA         | 18          | 11          | 14          | 16          |
| 10.5       | 6.8         | 4.6         | 5.2         | 3.2         |
| 29         | 31          | 39          | 45          | 21          |
| 1.8        | 14.1        | 1.8         | 0.8         | 1.5         |
| 10         | 13          | 13          | 12          | 16          |
| 2.3        | 5.9         | 5.6         | 1.9         | 8           |
| 10         | 7           | 3           | 5           | 4           |
| 1          | 0.8         | 0.7         | 0.6         | 1.6         |
| 22.4       | 16.9        | 6.3         | 2.8         | 31.4        |
| 0.1        | NA          | NA          | NA          | 0.1         |
| 0.2        | 0.3         | 0.3         | 0.3         | 0.4         |

|      |        |      |       |        |
|------|--------|------|-------|--------|
| 15.6 | 14.2   | 13.2 | 10.6  | 14.8   |
| 12.8 | 32.3   | 15.8 | 14.7  | 20.9   |
| 28.6 | 72.2   | 33.8 | 31.9  | 44     |
| 3.06 | 7.83   | 3.79 | 3.5   | 5.03   |
| 10.7 | 28.2   | 13.3 | 12.9  | 18     |
| 2.4  | 5.13   | 3.07 | 2.65  | 3.65   |
| 0.67 | 0.62   | 0.54 | 0.44  | 0.62   |
| 2.51 | 3.49   | 2.75 | 2.13  | 3.29   |
| 0.43 | 0.54   | 0.47 | 0.35  | 0.55   |
| 2.67 | 2.64   | 2.23 | 1.74  | 2.66   |
| 0.55 | 0.46   | 0.43 | 0.35  | 0.47   |
| 1.44 | 1.3    | 1.21 | 0.94  | 1.33   |
| 0.22 | 0.19   | 0.19 | 0.16  | 0.19   |
| 1.75 | 1.16   | 1.16 | 0.91  | 1.13   |
| 0.2  | 0.17   | 0.16 | 0.13  | 0.17   |
| 68   | 156.23 | 78.9 | 72.8  | 101.99 |
| 4.93 | 18.77  | 9.18 | 10.89 | 12.47  |
| 0.83 | 0.45   | 0.57 | 0.57  | 0.55   |
| 1.46 | 2.11   | 4.17 | 2.26  | 2.7    |
| 0.3  | 0.53   | 0.61 | 0.4   | 0.5    |

| WI 1    | RE 8    | L6      | GG1     | L4      |
|---------|---------|---------|---------|---------|
| W_CVG   | W_CVG   | W_CVG   | W_CVG   | W_CVG   |
| granite | granite | granite | granite | granite |
| 242.2   | 267     | 354.3   | 198.8   | 409.2   |
| 43.8    | 21.7    | 24.8    | 9.2     | 25.4    |
| 609     | 481     | 299     | 175     | 181     |
| 144.3   | 90.6    | 78.5    | 64.6    | 47.2    |
| 20.1    | 8.8     | 14.8    | 4.6     | 9.8     |
| 3.2     | 5.2     | 4.9     | 3.6     | 4.1     |
| 122.8   | 90      | 84.4    | 52      | 63.8    |
| 4.2     | 3.1     | 3.5     | 1.9     | 2.3     |
| 9.4     | 8.5     | 9.8     | 5.1     | 17.8    |
| 1.2     | 1.2     | 1.7     | 0.8     | 3.1     |
| 17.9    | 21.5    | 18.6    | 14.2    | 23      |
| 5       | 3       | 4       | 3       | 3       |
| 20.53   | NA      | 13.68   | 20.53   | NA      |
| 5.5     | 2       | 1       | 6.9     | 1.3     |
| 2.2     | 1.1     | 2.2     | 1.4     | 1.3     |
| 18      | 10      | 9       | NA      | NA      |
| 5.8     | 3.8     | 5.2     | 3.7     | 10.7    |
| 29      | 39      | 28      | 11      | 34      |
| 1.5     | 1.1     | 1.2     | 3       | 1.5     |
| 7       | 12      | 17      | 7       | 22      |
| 5.1     | 2.4     | 8       | 0.7     | 6.7     |
| 3       | 6       | 5       | 4       | 2       |
| 0.5     | 0.9     | 0.6     | NA      | 0.9     |
| 5.1     | 8.5     | 4       | 3.2     | 3       |
| NA      | NA      | 0.5     | NA      | 0.4     |
| 2.2     | 0.2     | 2.1     | 0.1     | NA      |
| 12.1    | 12.2    | 18.5    | 12.1    | 9.2     |
| 21.1    | 15.9    | 22.7    | 7.9     | 12.7    |
| 45.6    | 34.8    | 51.3    | 17.6    | 31.9    |
| 5.06    | 3.87    | 5.72    | 1.92    | 3.52    |
| 19.2    | 14.5    | 21.5    | 7       | 13.6    |
| 3.37    | 2.89    | 4       | 1.55    | 3.16    |
| 0.59    | 0.47    | 0.36    | 0.28    | 0.32    |
| 2.49    | 2.69    | 3.23    | 1.49    | 2.73    |
| 0.4     | 0.43    | 0.54    | 0.31    | 0.44    |

|       |       |        |       |       |
|-------|-------|--------|-------|-------|
| 2.23  | 2.21  | 3.08   | 1.94  | 1.95  |
| 0.41  | 0.4   | 0.62   | 0.4   | 0.27  |
| 1.19  | 1.07  | 1.83   | 1.19  | 0.63  |
| 0.19  | 0.16  | 0.3    | 0.2   | 0.09  |
| 1.2   | 1     | 1.88   | 1.33  | 0.52  |
| 0.17  | 0.15  | 0.28   | 0.18  | 0.08  |
| 103.2 | 80.54 | 117.34 | 43.29 | 71.91 |
| 11.85 | 10.72 | 8.14   | 4     | 16.47 |
| 0.62  | 0.52  | 0.31   | 0.56  | 0.33  |
| 1.68  | 2.95  | 4.51   | 3.08  | 8.67  |
| 0.4   | 0.56  | 1.18   | 1.14  | 2.26  |

Tab. 5: Sr–Nd isotopic data for Mg–K rocks of the Central and Southern Vosges Mts.

| Sample               | Rb<br>(ppm) | Sr<br>(ppm) | <sup>87</sup> Rb/ <sup>86</sup> Sr | <sup>87</sup> Sr/ <sup>86</sup> Sr | 2σ(m)    | ( <sup>87</sup> Sr/ <sup>86</sup> Sr) <sub>340</sub> | Sm<br>(ppm) | Nd<br>(ppm) |      |
|----------------------|-------------|-------------|------------------------------------|------------------------------------|----------|------------------------------------------------------|-------------|-------------|------|
| CVMg-K               |             |             |                                    |                                    |          |                                                      |             |             |      |
| Basic rocks          | EV 382N     | 295         | 488                                | 1.74486                            | 0.722133 | 0.000008                                             | 0.713671    | 18.89       | 86.2 |
| Dark facies          | CN 7        | 341         | 353                                | 2.79737                            | 0.725322 | 0.000006                                             | 0.711752    | 10.17       | 52.6 |
| Light facies         | CS 3        | 360         | 310                                | 3.35903                            | 0.727326 | 0.000008                                             | 0.711028    | 11.98       | 56.5 |
|                      | CS 21       | 340         | 249                                | 3.94960                            | 0.7295   | 0.000007                                             | 0.710332    | 12.02       | 57.9 |
|                      | ME 1        | 360         | 326                                | 3.18848                            | 0.726829 | 0.000006                                             | 0.711359    | 10.27       | 51.2 |
|                      | BR 14       | 300         | 413                                | 2.09829                            | 0.719834 | 0.000006                                             | 0.70966     | 13.86       | 61.1 |
| SVMg-K               |             |             |                                    |                                    |          |                                                      |             |             |      |
| Basic rocks          | BAB 5       | 287         | 374                                | 2.21864                            | 0.715875 | 0.000006                                             | 0.705122    | 5.21        | 31.0 |
|                      | BAB 3       | 185         | 465                                | 1.15003                            | 0.710428 | 0.000007                                             | 0.704857    | 7.64        | 43.4 |
| Porphyritic granite  | BA 8        | 336         | 413                                | 2.35392                            | 0.717469 | 0.000006                                             | 0.706059    | 5.63        | 30.9 |
|                      | BA 16       | 361         | 336                                | 3.10976                            | 0.723490 | 0.000006                                             | 0.708407    | 4.71        | 26.6 |
| Fine-grained granite | CO 3        | 480         | 332                                | 4.17767                            | 0.727601 | 0.000009                                             | 0.707330    | 10.56       | 49.4 |
|                      | CO 4        | 337         | 351                                | 2.78036                            | 0.723063 | 0.000006                                             | 0.709578    | 9.59        | 46.8 |
| Volcanics            | VOS 4       | 84          | 971                                | 0.25047                            | 0.707656 | 0.000006                                             | 0.706443    | 6.22        | 29.9 |
|                      | VOS 8       | 293         | 479                                | 1.76797                            | 0.715035 | 0.000007                                             | 0.706469    | 5.14        | 30.6 |

Tab. 6: Sr–Nd isotopic data for CVG samples.

| Sample       | Rb<br>(ppm) | Sr<br>(ppm) | $^{87}\text{Rb}/^{86}\text{Sr}$ | $^{87}\text{Sr}/^{86}\text{Sr}$ | $2\sigma(\text{m})$ | $(^{87}\text{Sr}/^{86}\text{Sr})_{320}$ | Sm<br>(ppm) | Nd<br>(ppm) | $^{147}\text{Sm}/^{144}\text{Nd}$ |
|--------------|-------------|-------------|---------------------------------|---------------------------------|---------------------|-----------------------------------------|-------------|-------------|-----------------------------------|
| <i>E-CVG</i> |             |             |                                 |                                 |                     |                                         |             |             |                                   |
| LV 8         | 270         | 249         | 3.13161                         | 0.723577                        | 0.000006            | 0.709283                                | 5.12        | 27.2        | 0.1138                            |
| TF 1         | 240         | 304         | 2.28791                         | 0.719805                        | 0.000006            | 0.709366                                | 4.74        | 25.8        | 0.1111                            |
| WI 10        | 253         | 251         | 2.92249                         | 0.724993                        | 0.000008            | 0.711652                                | 4.54        | 23.9        | 0.1148                            |
| BR 4         | 238         | 295         | 2.33659                         | 0.719567                        | 0.000008            | 0.708906                                | 5.44        | 29.8        | 0.1104                            |
| <i>W-CVG</i> |             |             |                                 |                                 |                     |                                         |             |             |                                   |
| GG 4         | 193         | 99          | 5.63569                         | 0.745478                        | 0.000007            | 0.719700                                | 4.38        | 20.1        | 0.1317                            |
| GG 9         | 260         | 288         | 2.60817                         | 0.727093                        | 0.000007            | 0.715184                                | 12.69       | 97.0        | 0.0791                            |
| RE 11        | 243         | 112         | 6.29468                         | 0.746988                        | 0.000010            | 0.718191                                | 3.53        | 19.3        | 0.1106                            |
| G1 3         | 376         | 217         | 5.02248                         | 0.738888                        | 0.000008            | 0.715929                                | 5.80        | 34.6        | 0.1013                            |



| $^{147}\text{Sm}/^{144}\text{Nd}$ | $^{143}\text{Nd}/^{144}\text{Nd}$ | $2\sigma(\text{m})$ | $(^{143}\text{Nd}/^{144}\text{Nd})_{340}$ | $\epsilon_{\text{Nd}}^{340}$ | $T_{\text{DM}}^{\text{Nd}}$<br>(Ga) |
|-----------------------------------|-----------------------------------|---------------------|-------------------------------------------|------------------------------|-------------------------------------|
| 0.1325                            | 0.512189                          | 0.000006            | 0.511894                                  | -5.97                        | 1.52                                |
| 0.1169                            | 0.51215                           | 0.000004            | 0.51189                                   | -6.06                        | 1.53                                |
| 0.1282                            | 0.512177                          | 0.000006            | 0.511892                                  | -6.03                        | 1.53                                |
| 0.1254                            | 0.512141                          | 0.000009            | 0.511861                                  | -6.62                        | 1.57                                |
| 0.1213                            | 0.512202                          | 0.000004            | 0.511932                                  | -5.23                        | 1.46                                |
| 0.1371                            | 0.512162                          | 0.000005            | 0.511857                                  | -6.71                        | 1.58                                |
|                                   |                                   |                     |                                           |                              |                                     |
| 0.1016                            | 0.512307                          | 0.000004            | 0.512081                                  | -2.33                        | 1.24                                |
| 0.1064                            | 0.512511                          | 0.000004            | 0.512274                                  | 1.44                         | 0.94                                |
| 0.1102                            | 0.512307                          | 0.000006            | 0.512062                                  | -2.7                         | 1.26                                |
| 0.1071                            | 0.512300                          | 0.000007            | 0.512062                                  | -2.7                         | 1.27                                |
| 0.1292                            | 0.512245                          | 0.000003            | 0.511957                                  | -4.74                        | 1.42                                |
| 0.1239                            | 0.512219                          | 0.000005            | 0.511943                                  | -5.02                        | 1.45                                |
| 0.1258                            | 0.512532                          | 0.000007            | 0.512252                                  | 1.01                         | 0.97                                |
| 0.1016                            | 0.512210                          | 0.000004            | 0.511984                                  | -4.22                        | 1.38                                |

| $^{143}\text{Nd}/^{144}\text{Nd}$ | $2\sigma(\text{m})$ | $(^{143}\text{Nd}/^{144}\text{Nd})_{320}$ | $\epsilon_{\text{Nd}}^{320}$ | $T_{\text{DM}}^{\text{Nd}}$<br>(Ga) |
|-----------------------------------|---------------------|-------------------------------------------|------------------------------|-------------------------------------|
| 0.512241                          | 0.000005            | 0.512002                                  | -4.36                        | 1.38                                |
| 0.512250                          | 0.000004            | 0.512018                                  | -4.07                        | 1.36                                |
| 0.512217                          | 0.000005            | 0.511976                                  | -4.87                        | 1.42                                |
| 0.512239                          | 0.000006            | 0.512008                                  | -4.26                        | 1.37                                |
|                                   |                     |                                           |                              |                                     |
| 0.512158                          | 0.000005            | 0.511882                                  | -6.72                        | 1.56                                |
| 0.512053                          | 0.000006            | 0.511888                                  | -6.6                         | 1.56                                |
| 0.512145                          | 0.000006            | 0.511913                                  | -6.1                         | 1.52                                |
| 0.512113                          | 0.000006            | 0.511901                                  | -6.35                        | 1.54                                |
